# Supplementary material for: Infected juvenile salmon can experience increased predation during freshwater migration
Source: PubMed Central journal article supplement (PMC8074935; doi:10.1098/rsos.201522), 2021-03-24
Supplement: rsos201522_review_history.pdf [file rsos201522_review_history.pdf]

## **Infected juvenile salmon can experience increased predation during freshwater migration**

Nathan B. Furey, Arthur L. Bass, Kristi M. Miller, Shaorong Li, Andrew G. Lotto, Stephen J. Healy, S. Matthew Drenner and Scott G. Hinch

### **Article citation details**

*R. Soc. open sci.* **8**: 201522.  
<http://dx.doi.org/10.1098/rsos.201522>

### **Review timeline**

Original submission: 2 September 2020  
1st revised submission: 10 November 2020  
2nd revised submission: 26 January 2021  
3rd revised submission: 2 March 2021  
Final acceptance: 3 March 2021

Note: Reports are unedited and appear as submitted by the referee. The review history appears in chronological order.

Note: This manuscript was transferred from another Royal Society journal with peer review.

## Review History

### RSOS-201522.R0 (Original submission)

#### Review form: Reviewer 1

**Is the manuscript scientifically sound in its present form?**

Yes

**Are the interpretations and conclusions justified by the results?**

Yes

**Is the language acceptable?**

Yes

**Do you have any ethical concerns with this paper?**

Yes

**Have you any concerns about statistical analyses in this paper?**

No

**Recommendation?**

Major revision is needed (please make suggestions in comments)

**Comments to the Author(s)**

I reviewed this paper in an earlier stage, I still think it's excellent and very interesting and the authors responded to most of my initial comments. I suggest some minor revisions on this version.

## Minor Comments

L47- rather than saying "few studies", it might be better to quickly summarise what the three studies that have studied this have concluded

L64- given that this virus is a focal point of the analysis, it would be ideal to expand, here or elsewhere, on the ecology of this virus so far as it is known

L67- a bit of a throw in to the introduction given that this has not been brought up at all yet- how does it relate? I suggest not to simply delete this, but work in earlier in the introduction how host gene expression can be affected by various biotic and abiotic factors that can affect survival

L75- in what way was it randomized? There is always selection bias with capture gears that should be acknowledged

L80- clarify what information loss is anticipated for smolts frozen at minus twenty

L82- again could slower or shallower swimming individuals be more vulnerable to dipnet capture? Is there any way to know? Just curious.

L158- what is prevalence here? Abundance or LOD value?

L199- have read this paragraph four times and find it quite difficult to decipher what is being communicated.. consider revising for clarity

L222- should be i.e. (in other words) not e.g. (for example)

L253- discuss whether this is additive or compensatory mortality

L257- alt+248 will give you the symbol for degrees

L261- detectability of the smolt?

L268- any other of the work from the Miller lab that has revealed the spatial or species distribution of this virus?

L274- is this related to relative infection burden, defined in several papers by Teffer and Bass?

L372- this discussion is lacking a discussion on the fundamentals of predation, especially the role of compensatory compared to additive mortality and what the implications are for salmon ecology. There are several other papers about salmon predation and the role of predators.. for Atlantic salmon there are some papers on cormorant predation as well as trout and cod, and striped bass predation. There is a Wood et al. paper re- merganser predation on Pacific salmon. There is a lot of anti-predator narratives that are clearly informed by the findings here that should be addressed more explicitly in the discussion.

L379- Lennox et al. Biol Conserv provides a comprehensive discussion of this

**Review form: Reviewer 2****Is the manuscript scientifically sound in its present form?**

No

**Are the interpretations and conclusions justified by the results?**

No

**Is the language acceptable?**

Yes

**Do you have any ethical concerns with this paper?**

No

**Have you any concerns about statistical analyses in this paper?**

Yes

**Recommendation?**

Major revision is needed (please make suggestions in comments)

**Comments to the Author(s)**

Furey et al examine the differential consumption of infected salmon smolt by bull trout in British Columbia, Canada by screening consumed smolts for the presence of 17 infectious agents. As I mentioned in my last review, I think this is an interesting study that has some very interesting implications. However, I think the reviewers raised a number of valid concerns in the last review that were not adequately addressed by the authors. In a few cases, I learned more about the study, and information relevant to the study, from the responses to the reviewers rather than from the manuscript. In this review, I tried to point out where that information would be useful to have in the text. As a result, I still think this paper has a number of weaknesses that need to be addressed.

My one major concern is that the statistical analysis needs to be changed from multiple Fishers exact tests to a mixed effects glm approach with model selection (e.g. information criterion) to account for the lack of independence. My more specific comments related to the manuscript are below.

**Introduction**

Lines 64-65 – There is only one sentence for IHNV in the introduction, whereas it seems like IHNV is the major focal disease of this paper based on later descriptions in the results and discussion. I suggest setting up this disease as a major focus by providing a broader description of this disease, its life history, and its impacts on salmonids.

**Methods**

Lines 82-83 – I appreciate that this was an opportunistic study and there was insufficient funding to collect adequate samples in 2015. However, this should be acknowledged in the text. It would be valuable to make a comment here about how the sample sizes were decided upon and, in the discussion, make a comment that it would be valuable to have more samples of the non-predated fish to have a better sample of the prevalence of the disease throughout the population. I realize that you couldn't sample more of the non-predated smolts due to funding issues, which is no fault of your own, but is still a weakness of your study. I think we should all acknowledge the weaknesses of our studies in our papers so that the next studies that build on our research can use our experiences to improve their designs.

Lines 91-92 – I previously made the suggestion to add some indication of what the prevalence of the diseases throughout Chilko Lake to Table one. The authors ignored this suggestion, but I still think this would be extremely important to have since your sample sizes of the non-predated fish were so small. I noticed in response #10 to referee 2 that interannual variability is being assessed using monitoring programs. In that same response, you also cite some of your own groups work

in the system that provides some estimates of disease prevalence rates, so it appears these data exist.

Lines 97-98 – I had no idea that the VDD panel was not an ‘accepted or standard approach to classifying fish as diseased or not’ until I read the comments of reviewer four. Since that is what you are using to assess the disease state of your fish, and the entire conclusions of your paper depend on the diseased state of consumed and non-consumed fish, that seems like a key piece of information that should better described in the paper. I recommend the authors spend a few sentences in the methods briefly summarizing the important conclusions from Miller et al. 2017 (rather than chastising reviewer #4 that they need to read Miller et al. 2017). Much of the information that I think would be important for readers to have appears in response #19 to reviewer 4. In my opinion, a well written paper is one where there is sufficient information to justify the work without having to go and read another paper.

Lines 147-148 - How did you select these genes? Was this based on previous research that indicated these genes would not be degraded across samples? If not, was it based on the analysis of the genes from this study? If so, how can you be positive that this isn't some other artifact of the five samples that you ended up removing?

Lines 158-160 – Running a single Fisher’s exact test for each pathogen for each tissue and year is statistically inappropriate. First of all, you have tissues which are collected from the same fish. Because they are collected from the same fish they are not independent from each other. This could potentially help to address some of the concerns of reviewer #4 comment 10 – where you have different responses of the same tissue within the same fish. Then you have pathogens that are collected from the same river in the same year. I suspect that different pathogens may be correlated with environmental conditions (i.e. temperature, flow, etc); therefore, it is likely that different pathogens likely have a higher occurrence in one year than in another year. This needs to be analyzed in a mixed effects logistic regression model with individual fish as a random effect and year, pathogen, and tissue as fixed effects. The authors should also include fish length as a covariate, since the authors also run a posthoc test comparing the fork length of IHN+ and IHN- fish. This would also make sense since fish size is certainly related to fish predation and may also be related to susceptibility to disease. A glm framework would be necessary to tease out these idiosyncrasies. As the authors suggested, you can also look at interactions between year and pathogen, but based on your small sample size, I’m almost positive you will not have a sufficient sample size to detect those interactions. The wonderful thing about using AIC to select the most parsimonious model is that it will only let you fit as complex a model as your data will allow. As the authors state, the output from a logistic regression can be expressed as odds ratios, which is the same as what they express here.

Line 164 – I agree with reviewer #4 that species richness has a specific definition in ecology. The count of the number of infectious agents per sample may not be the most appropriate response to assess if species richness had an effect. I think Shannon’s diversity index, which takes into account both the count and the abundance (which in your case would probably be cycle threshold) would probably be more appropriate.

Line 175 – This is the first place in the text where I got the impression that IHNv is a focal disease of this paper. I had to go back to the introduction to realize that there was one sentence where you specifically mention this disease. As someone who isn’t specifically familiar with this disease, I suggest spending a little more time in the introduction to describe the importance of this disease and the possible population level implications it may have for salmon.

Line 228-229 – As I previously suggest, fork length should be included as a covariate in the mixed effects logistic regression.

Discussion

Lines 254-268 – Some of this paragraph should be moved to the introduction

Tables

Table 1 – a percent without a sample size is not very valuable. Furthermore, please calculate the standard errors for these percentages. There is a simple equation to calculate the standard error of a proportion.

Supplemental material

.csv files – my comment regarding the metadata for the supplemental material was primarily regarding the .csv files. I would like you to provide an excel or text file (.doc or .txt) that describes the content of all the columns in each of your .csv files in relatively easy to understand language.

## Decision letter (RSOS-201522.R0)

We hope you are keeping well at this difficult and unusual time. We continue to value your support of the journal in these challenging circumstances. If Royal Society Open Science can assist you at all, please don't hesitate to let us know at the email address below.

Dear Dr Furey,

The Editors assigned to your paper RSOS-201522 "Infected juvenile salmon can experience increased predation during freshwater migration" have now received comments from reviewers and would like you to revise the paper in accordance with the reviewer comments and any comments from the Editors. Please note this decision does not guarantee eventual acceptance.

We invite you to respond to the comments supplied below and revise your manuscript. Below the referees' and Editors' comments (where applicable) we provide additional requirements. Final acceptance of your manuscript is dependent on these requirements being met. We provide guidance below to help you prepare your revision.

We do not generally allow multiple rounds of revision so we urge you to make every effort to fully address all of the comments at this stage. If deemed necessary by the Editors, your manuscript will be sent back to one or more of the original reviewers for assessment. If the original reviewers are not available, we may invite new reviewers.

Please submit your revised manuscript and required files (see below) no later than 21 days from today's (ie 21-Sep-2020) date. Note: the ScholarOne system will 'lock' if submission of the revision is attempted 21 or more days after the deadline. If you do not think you will be able to meet this deadline please contact the editorial office immediately.

Please note article processing charges apply to papers accepted for publication in Royal Society Open Science (<https://royalsocietypublishing.org/rsos/charges>). Charges will also apply to papers transferred to the journal from other Royal Society Publishing journals, as well as papers submitted as part of our collaboration with the Royal Society of Chemistry (<https://royalsocietypublishing.org/rsos/chemistry>). Fee waivers are available but must be requested when you submit your revision (<https://royalsocietypublishing.org/rsos/waivers>).

Thank you for submitting your manuscript to Royal Society Open Science and we look forward to receiving your revision. If you have any questions at all, please do not hesitate to get in touch.

Kind regards,  
Lianne Parkhouse  
Editorial Coordinator  
Royal Society Open Science  
openscience@royalsociety.org

on behalf of the Associate Editor, and Professor Kevin Padian (Subject Editor)  
openscience@royalsociety.org

Associate Editor Comments to Author:

Thank you for the transfer of this paper. Two of the original reviewers have assessed the submission and the changes you have made. One is broadly of the view the paper is on the right track; however, the second strongly feels that you have not engaged satisfactorily with the queries raised in the earlier round of review. We would like you to take their concerns seriously and would highlight that, unless there are exceptional reasons for doing so, we do not routinely permit multiple rounds of major revision: indeed, if the reviewers are not persuaded that you are taking steps to address their concerns in the revision, it is possible your paper will be rejected. With this in mind, please do your best to respond to their concerns both in a tracked-changes version of your revision and also a clear point-by-point response, so the editors and reviewers can see how you tackled the critiques. Good luck and we look forward to reading your revised paper in due course.

Reviewer comments to Author:

Reviewer: 1  
Comments to the Author(s)

I reviewed this paper in an earlier stage, I still think it's excellent and very interesting and the authors responded to most of my initial comments. I suggest some minor revisions on this version.

Minor Comments

L47- rather than saying "few studies", it might be better to quickly summarise what the three studies that have studied this have concluded

L64- given that this virus is a focal point of the analysis, it would be ideal to expand, here or elsewhere, on the ecology of this virus so far as it is known

L67- a bit of a throw in to the introduction given that this has not been brought up at all yet- how does it relate? I suggest not to simply delete this, but work in earlier in the introduction how host gene expression can be affected by various biotic and abiotic factors that can affect survival

L75- in what way was it randomized? There is always selection bias with capture gears that should be acknowledged

L80- clarify what information loss is anticipated for smolts frozen at minus twenty

L82- again could slower or shallower swimming individuals be more vulnerable to dipnet capture? Is there any way to know? Just curious.

L158- what is prevalence here? Abundance or LOD value?

L199- have read this paragraph four times and find it quite difficult to decipher what is being communicated.. consider revising for clarity

L222- should be i.e. (in other words) not e.g. (for example)

L253- discuss whether this is additive or compensatory mortality

L257- alt+248 will give you the symbol for degrees

L261- detectability of the smolt?

L268- any other of the work from the Miller lab that has revealed the spatial or species distribution of this virus?

L274- is this related to relative infection burden, defined in several papers by Teffer and Bass?

L372- this discussion is lacking a discussion on the fundamentals of predation, especially the role of compensatory compared to additive mortality and what the implications are for salmon ecology. There are several other papers about salmon predation and the role of predators.. for Atlantic salmon there are some papers on cormorant predation as well as trout and cod, and striped bass predation. There is a Wood et al. paper re- merganser predation on Pacific salmon. There is a lot of anti-predator narratives that are clearly informed by the findings here that should be addressed more explicitly in the discussion.

L379- Lennox et al. Biol Conserv provides a comprehensive discussion of this

Reviewer: 2

Comments to the Author(s)

Furey et al examine the differential consumption of infected salmon smolt by bull trout in British Columbia, Canada by screening consumed smolts for the presence of 17 infectious agents. As I mentioned in my last review, I think this is an interesting study that has some very interesting implications. However, I think the reviewers raised a number of valid concerns in the last review that were not adequately addressed by the authors. In a few cases, I learned more about the study, and information relevant to the study, from the responses to the reviewers rather than from the manuscript. In this review, I tried to point out where that information would be useful to have in the text. As a result, I still think this paper has a number of weaknesses that need to be addressed.

My one major concern is that the statistical analysis needs to be changed from multiple Fishers exact tests to a mixed effects glm approach with model selection (e.g. information criterion) to account for the lack of independence. My more specific comments related to the manuscript are below.

#### Introduction

Lines 64-65 – There is only one sentence for IHNV in the introduction, whereas it seems like IHNV is the major focal disease of this paper based on later descriptions in the results and discussion. I suggestion setting up this disease as a major focus by providing a broader description of this disease, its life history, and its impacts on salmonids.

#### Methods

Lines 82-83 – I appreciate that this was an opportunistic study and there was insufficient funding to collect adequate samples in 2015. However, this should be acknowledged in the text. It would be valuable to make a comment here about how the sample sizes were decided upon and, in the discussion, make a comment that it would be valuable to have more samples of the non-predated fish to have a better sample of the prevalence of the disease throughout the population. I realize that you couldn't sample more of the non-predated smolts due to funding issues, which is no fault of your own, but is still a weakness of your study. I think we should all acknowledge the

weaknesses of our studies in our papers so that the next studies that build on our research can use our experiences to improve their designs.

Lines 91-92 – I previously made the suggestion to add some indication of what the prevalence of the diseases throughout Chilko Lake to Table one. The authors ignored this suggestion, but I still think this would be extremely important to have since your sample sizes of the non-predated fish were so small. I noticed in response #10 to referee 2 that interannual variability is being assessed using monitoring programs. In that same response, you also cite some of your own groups work in the system that provides some estimates of disease prevalence rates, so it appears these data exist.

Lines 97-98 – I had no idea that the VDD panel was not an ‘accepted or standard approach to classifying fish as diseased or not’ until I read the comments of reviewer four. Since that is what you are using to assess the disease state of your fish, and the entire conclusions of your paper depend on the diseased state of consumed and non-consumed fish, that seems like a key piece of information that should better described in the paper. I recommend the authors spend a few sentences in the methods briefly summarizing the important conclusions from Miller et al. 2017 (rather than chastising reviewer #4 that they need to read Miller et al. 2017). Much of the information that I think would be important for readers to have appears in response #19 to reviewer 4. In my opinion, a well written paper is one where there is sufficient information to justify the work without having to go and read another paper.

Lines 147-148 - How did you select these genes? Was this based on previous research that indicated these genes would not be degraded across samples? If not, was it based on the analysis of the genes from this study? If so, how can you be positive that this isn't some other artifact of the five samples that you ended up removing?

Lines 158-160 – Running a single Fisher’s exact test for each pathogen for each tissue and year is statistically inappropriate. First of all, you have tissues which are collected from the same fish. Because they are collected from the same fish they are not independent from each other. This could potentially help to address some of the concerns of reviewer #4 comment 10 – where you have different responses of the same tissue within the same fish. Then you have pathogens that are collected from the same river in the same year. I suspect that different pathogens may be correlated with environmental conditions (i.e. temperature, flow, etc); therefore, it is likely that different pathogens likely have a higher occurrence in one year than in another year. This needs to be analyzed in a mixed effects logistic regression model with individual fish as a random effect and year, pathogen, and tissue as fixed effects. The authors should also include fish length as a covariate, since the authors also run a posthoc test comparing the fork length of IHN+ and IHN- fish. This would also make sense since fish size is certainly related to fish predation and may also be related to susceptibility to disease. A glm framework would be necessary to tease out these idiosyncrasies. As the authors suggested, you can also look at interactions between year and pathogen, but based on your small sample size, I’m almost positive you will not have a sufficient sample size to detect those interactions. The wonderful thing about using AIC to select the most parsimonious model is that it will only let you fit as complex a model as your data will allow. As the authors state, the output from a logistic regression can be expressed as odds ratios, which is the same as what they express here.

Line 164 – I agree with reviewer #4 that species richness has a specific definition in ecology. The count of the number of infectious agents per sample may not be the most appropriate response to assess if species richness had an effect. I think Shannon’s diversity index, which takes into account both the count and the abundance (which in your case would probably be cycle threshold) would probably be more appropriate.



Line 175 – This is the first place in the text where I got the impression that IHNv is a focal disease of this paper. I had to go back to the introduction to realize that there was one sentence where you specifically mention this disease. As someone who isn't specifically familiar with this disease, I suggest spending a little more time in the introduction to describe the importance of this disease and the possible population level implications it may have for salmon.

Line 228-229 – As I previously suggest, fork length should be included as a covariate in the mixed effects logistic regression.

Discussion

Lines 254-268 – Some of this paragraph should be moved to the introduction

Tables

Table 1 – a percent without a sample size is not very valuable. Furthermore, please calculate the standard errors for these percentages. There is a simple equation to calculate the standard error of a proportion.

Supplemental material

.csv files – my comment regarding the metadata for the supplemental material was primarily regarding the .csv files. I would like you to provide a excel or text file (.doc or .txt) that describes the content of all the columns in each of your .csv files in relatively easy to understand language.

===PREPARING YOUR MANUSCRIPT===

Your revised paper should include the changes requested by the referees and Editors of your manuscript. You should provide two versions of this manuscript and both versions must be provided in an editable format:

one version identifying all the changes that have been made (for instance, in coloured highlight, in bold text, or tracked changes);

a 'clean' version of the new manuscript that incorporates the changes made, but does not highlight them. This version will be used for typesetting if your manuscript is accepted.

Please ensure that any equations included in the paper are editable text and not embedded images.

Please ensure that you include an acknowledgements' section before your reference list/bibliography. This should acknowledge anyone who assisted with your work, but does not qualify as an author per the guidelines at <https://royalsociety.org/journals/ethics-policies/openness/>.

While not essential, it will speed up the preparation of your manuscript proof if accepted if you format your references/bibliography in Vancouver style (please see <https://royalsociety.org/journals/authors/author-guidelines/#formatting>). You should include DOIs for as many of the references as possible.

If you have been asked to revise the written English in your submission as a condition of publication, you must do so, and you are expected to provide evidence that you have received language editing support. The journal would prefer that you use a professional language editing service and provide a certificate of editing, but a signed letter from a colleague who is a native speaker of English is acceptable. Note the journal has arranged a number of discounts for authors

using professional language editing services  
(<https://royalsociety.org/journals/authors/benefits/language-editing/>).

#### ===PREPARING YOUR REVISION IN SCHOLARONE===

To revise your manuscript, log into <https://mc.manuscriptcentral.com/rsos> and enter your Author Centre - this may be accessed by clicking on "Author" in the dark toolbar at the top of the page (just below the journal name). You will find your manuscript listed under "Manuscripts with Decisions". Under "Actions", click on "Create a Revision".

Attach your point-by-point response to referees and Editors at Step 1 'View and respond to decision letter'. This document should be uploaded in an editable file type (.doc or .docx are preferred). This is essential.

Please ensure that you include a summary of your paper at Step 2 'Type, Title, & Abstract'. This should be no more than 100 words to explain to a non-scientific audience the key findings of your research. This will be included in a weekly highlights email circulated by the Royal Society press office to national UK, international, and scientific news outlets to promote your work.

At Step 3 'File upload' you should include the following files:

-- Your revised manuscript in editable file format (.doc, .docx, or .tex preferred). You should upload two versions:

- 1) One version identifying all the changes that have been made (for instance, in coloured highlight, in bold text, or tracked changes);
- 2) A 'clean' version of the new manuscript that incorporates the changes made, but does not highlight them.

-- An individual file of each figure (EPS or print-quality PDF preferred [either format should be produced directly from original creation package], or original software format).

-- An editable file of each table (.doc, .docx, .xls, .xlsx, or .csv).

-- An editable file of all figure and table captions.

Note: you may upload the figure, table, and caption files in a single Zip folder.

-- Any electronic supplementary material (ESM).

-- If you are requesting a discretionary waiver for the article processing charge, the waiver form must be included at this step.

-- If you are providing image files for potential cover images, please upload these at this step, and inform the editorial office you have done so. You must hold the copyright to any image provided.

-- A copy of your point-by-point response to referees and Editors. This will expedite the preparation of your proof.

At Step 6 'Details & comments', you should review and respond to the queries on the electronic submission form. In particular, we would ask that you do the following:

-- Ensure that your data access statement meets the requirements at

<https://royalsociety.org/journals/authors/author-guidelines/#data>. You should ensure that you cite the dataset in your reference list. If you have deposited data etc in the Dryad repository, please include both the 'For publication' link and 'For review' link at this stage.

-- If you are requesting an article processing charge waiver, you must select the relevant waiver option (if requesting a discretionary waiver, the form should have been uploaded at Step 3 'File upload' above).

-- If you have uploaded ESM files, please ensure you follow the guidance at

<https://royalsociety.org/journals/authors/author-guidelines/#supplementary-material> to include a suitable title and informative caption. An example of appropriate titling and captioning may be found at [https://figshare.com/articles/Table\\_S2\\_from\\_Is\\_there\\_a\\_trade-](https://figshare.com/articles/Table_S2_from_Is_there_a_trade-)

off\_between\_peak\_performance\_and\_performance\_breadth\_across\_temperatures\_for\_aerobic\_sc  
ope\_in\_teleost\_fishes\_/3843624.

At Step 7 'Review & submit', you must view the PDF proof of the manuscript before you will be able to submit the revision. Note: if any parts of the electronic submission form have not been completed, these will be noted by red message boxes.

## Author's Response to Decision Letter for (RSOS-201522.R0)

See Appendix A.

## RSOS-201522.R1 (Revision)

### Review form: Reviewer 1

**Is the manuscript scientifically sound in its present form?**

Yes

**Are the interpretations and conclusions justified by the results?**

Yes

**Is the language acceptable?**

Yes

**Do you have any ethical concerns with this paper?**

No

**Have you any concerns about statistical analyses in this paper?**

No

**Recommendation?**

Accept as is

**Comments to the Author(s)**

Well done- really enjoy this paper

### Review form: Reviewer 2

**Is the manuscript scientifically sound in its present form?**

Yes

**Are the interpretations and conclusions justified by the results?**

Yes

**Is the language acceptable?**

Yes

**Do you have any ethical concerns with this paper?**

No

**Have you any concerns about statistical analyses in this paper?**

Yes

**Recommendation?**

Major revision is needed (please make suggestions in comments)

**Comments to the Author(s)**

In general, Furey et al. did a good job addressing my comments, especially in the introduction. I still have some large concerns with the analysis, that I believe the authors can address relatively quickly, if given the opportunity. I also have some concerns that the authors tend to oversell their results in the discussion. Specifically, the results show that the only disease that appeared to increase the susceptibility to predation was IHNV, which was only present in one year. In contrast, other diseases that appeared to be much more prevalent, did not increase predation rates. However, the authors did not mention this dichotomy in the discussion at all. I think this is a major oversight that can have some major implications. I recommend the authors temper their conclusions in the discussion to better represent that they only found that one disease increased predation rates, while other diseases appeared to have minimal effect.

Perhaps there are differences in these diseases and the way that they influence fish behavior that influence the fish's susceptibility to predation.

**Specific comments:**

Line 124 – Was using fish in the best digestion condition necessary to prevent degradation of the disease DNA? Could this have influenced your analysis later where you compared condition of the consumed and non-consumed fish?

Line 195-198 – Based on the discussion that we've been having; it is apparent that this is a complex dataset that requires some careful consideration in how it is analyzed. I appreciate that the authors put the effort into attempting the mixed effects model, unfortunately without success. However, I still don't believe that individual Fisher's exact test for each tissue and year is the correct way to analyze these data. The main problem with the GLM that I suggested appeared to be the year effect, due to the singularity issue. I will list what I think is required at a minimum and then make some additional recommendations for some added complexity that I think would improve the analysis:

1) At a minimum the authors should fit a logistic regression where the response is whether or not a fish was predated and the covariates are: a) whether or not that fish was infected with the single disease (e.g. IHNV) the authors want to test, b) fish length, c) the tissue (gill or liver) tested, d) a year effect for the diseases that occur over multiple years. Fish length needs to be included in this GLM, rather than using a second t-test later as the authors currently do. Fitting one model to test whether disease increases predation risk and a second to test if there is an effect of length on predation is inappropriate, because any results from these tests will give you false precision since you are doing two separate tests and assuming independence between them. However, it is the same fish getting eaten, so they cannot be independent. If the authors have further difficulty getting the models to converge, I highly encourage them to consult with a statistician or quantitative ecologist that can help them through the analysis.

2) It might also be interesting to try to fit a model that includes multiple diseases, but I recommend that the authors only include the most prevalent diseases (e.g. Candidatus

Branchiomonas cisticola, Flavobacterium psychrophilum, ichthyophthirius multifiliis, Infectious hematopoietic necrosis virus, Pacific salmon parvovirus). That will greatly reduce the number of parameters in your model, since it appears fairly obvious without using statistics that none of the other diseases will come out as significant.

3) Another option, if you did want to show the effect of all disease on predation risk, would be to fit a multivariate GLM. But that would be considerably more complex and not necessary for your purposes.

Lines 220-224: See my recommendation above about testing the effects of length on IHN infection. If the authors want to disentangle the effect of fish length and disease on predation rates, these need to be included in the same model. Currently, the authors are testing the hypothesis that there is no difference in length between IHN infected fish. But, it is still possible that the consumed IHN fish were smaller than all other fish.

Line 275-280: It's unclear to me how these tests differs from the tests the authors describe on lines 220-224.

Lines 302-316: I think somewhere in here you should comment on the differences between IHNv and the other diseases. You observed an increased risk of predation with IHNv, but not with any of the other infections, based on what you know of these diseases, can you formulate some hypotheses about why you observed those results?

Lines 330-331: Specifically, you provide evidence that infection with one specific disease can increase risk to fish in the wild. In fact, two other diseases, that appear to have higher prevalence in your samples and in the system, didn't have any impact on predation. It seems like you are ignoring that result to focus on the single positive result that you had. I find it really interesting that there appear to be some diseases that don't increase the risk of predation. I think that dichotomy, that some diseases do increase the risk of predation while some may not, should be addressed in the discussion.

Lines 430: Again, you are overselling your results a little. You didn't find that 'specific infections can be associated with higher predation risks', but rather that a single infection was associated with a higher predation risk while multiple others were not.

Table 1: I appreciate that the authors added the extra information that was requested, but that generally requires adjusting the table to accommodate the additional information. This table is now a little difficult to comprehend with the way it is arranged. They should to play around with formatting to make it easier for the reader to digest.

Table 1: Do you have sample sizes for these other studies? Are there any confidence intervals for these prevalence rates?

## Decision letter (RSOS-201522.R1)

We hope you are keeping well at this difficult and unusual time. We continue to value your support of the journal in these challenging circumstances. If Royal Society Open Science can assist you at all, please don't hesitate to let us know at the email address below.

Dear Dr Furey

The Editors assigned to your paper RSOS-201522.R1 "Infected juvenile salmon can experience increased predation during freshwater migration" have now received comments from reviewers and would like you to revise the paper in accordance with the reviewer comments and any comments from the Editors. Please note this decision does not guarantee eventual acceptance.

We invite you to respond to the comments supplied below and revise your manuscript. Below the referees' and Editors' comments (where applicable) we provide additional requirements. Final acceptance of your manuscript is dependent on these requirements being met. We provide guidance below to help you prepare your revision.

We do not generally allow multiple rounds of revision so we urge you to make every effort to fully address all of the comments at this stage. If deemed necessary by the Editors, your manuscript will be sent back to one or more of the original reviewers for assessment. If the original reviewers are not available, we may invite new reviewers.

Please submit your revised manuscript and required files (see below) no later than 21 days from today's (ie 11-Dec-2020) date. Note: the ScholarOne system will 'lock' if submission of the revision is attempted 21 or more days after the deadline. If you do not think you will be able to meet this deadline please contact the editorial office immediately.

Please note article processing charges apply to papers accepted for publication in Royal Society Open Science (<https://royalsocietypublishing.org/rsos/charges>). Charges will also apply to papers transferred to the journal from other Royal Society Publishing journals, as well as papers submitted as part of our collaboration with the Royal Society of Chemistry (<https://royalsocietypublishing.org/rsos/chemistry>). Fee waivers are available but must be requested when you submit your revision (<https://royalsocietypublishing.org/rsos/waivers>).

Thank you for submitting your manuscript to Royal Society Open Science and we look forward to receiving your revision. If you have any questions at all, please do not hesitate to get in touch.

Best regards,

Lianne Parkhouse  
Editorial Coordinator  
Royal Society Open Science  
[openscience@royalsociety.org](mailto:openscience@royalsociety.org)

on behalf of the Associate Editor and Professor Kevin Padian (Subject Editor)  
[openscience@royalsociety.org](mailto:openscience@royalsociety.org)

Associate Editor Comments to Author:

Given that the authors seem to have tried hard to improve the paper but one of the reviewers still has some concerns, it is fair to offer the authors a final opportunity to revise, but they should be aware this is the final opportunity they will have.

Reviewer comments to Author:

Reviewer: 2

Comments to the Author(s)

In general, Furey et al. did a good job addressing my comments, especially in the introduction. I still have some large concerns with the analysis, that I believe the authors can address relatively quickly, if given the opportunity. I also have some concerns that the authors tend to oversell their

results in the discussion. Specifically, the results show that the only disease that appeared to increase the susceptibility to predation was IHNV, which was only present in one year. In contrast, other diseases that appeared to be much more prevalent, did not increase predation rates. However, the authors did not mention this dichotomy in the discussion at all. I think this is a major oversight that can have some major implications. I recommend the authors temper their conclusions in the discussion to better represent that they only found that one disease increased predation rates, while other diseases appeared to have minimal effect. Perhaps there are differences in these diseases and the way that they influence fish behavior that influence the fish's susceptibility to predation.

Specific comments:

Line 124 – Was using fish in the best digestion condition necessary to prevent degradation of the disease DNA? Could this have influenced your analysis later where you compared condition of the consumed and non-consumed fish?

Line 195-198 – Based on the discussion that we've been having; it is apparent that this is a complex dataset that requires some careful consideration in how it is analyzed. I appreciate that the authors put the effort into attempting the mixed effects model, unfortunately without success. However, I still don't believe that individual Fisher's exact test for each tissue and year is the correct way to analyze these data. The main problem with the GLM that I suggested appeared to be the year effect, due to the singularity issue. I will list what I think is required at a minimum and then make some additional recommendations for some added complexity that I think would improve the analysis:

- 1) At a minimum the authors should fit a logistic regression where the response is whether or not a fish was predated and the covariates are: a) whether or not that fish was infected with the single disease (e.g. IHNV) the authors want to test, b) fish length, c) the tissue (gill or liver) tested, d) a year effect for the diseases that occur over multiple years. Fish length needs to be included in this GLM, rather than using a second t-test later as the authors currently do. Fitting one model to test whether disease increases predation risk and a second to test if there is an effect of length on predation is inappropriate, because any results from these tests will give you false precision since you are doing two separate tests and assuming independence between them. However, it is the same fish getting eaten, so they cannot be independent. If the authors have further difficulty getting the models to converge, I highly encourage them to consult with a statistician or quantitative ecologist that can help them through the analysis.
- 2) It might also be interesting to try to fit a model that includes multiple diseases, but I recommend that the authors only include the most prevalent diseases (e.g. *Candidatus Branchiomonas cisticola*, *Flavobacterium psychrophilum*, *ichthyophthirius multifiliis*, Infectious hematopoietic necrosis virus, Pacific salmon parvovirus). That will greatly reduce the number of parameters in your model, since it appears fairly obvious without using statistics that none of the other diseases will come out as significant.
- 3) Another option, if you did want to show the effect of all disease on predation risk, would be to fit a multivariate GLM. But that would be considerably more complex and not necessary for your purposes.

Lines 220-224: See my recommendation above about testing the effects of length on IHN infection. If the authors want to disentangle the effect of fish length and disease on predation rates, these need to be included in the same model. Currently, the authors are testing the hypothesis that there is no difference in length between IHN infected fish. But, it is still possible that the consumed IHN fish were smaller than all other fish.

Line 275-280: It's unclear to me how these tests differs from the tests the authors describe on lines 220-224.

Lines 302-316: I think somewhere in here you should comment on the differences between IHNv and the other diseases. You observed an increased risk of predation with IHNv, but not with any of the other infections, based on what you know of these diseases, can you formulate some hypotheses about why you observed those results?

Lines 330-331: Specifically, you provide evidence that infection with one specific disease can increase risk to fish in the wild. In fact, two other diseases, that appear to have higher prevalence in your samples and in the system, didn't have any impact on predation. It seems like you are ignoring that result to focus on the single positive result that you had. I find it really interesting that there appear to be some diseases that don't increase the risk of predation. I think that dichotomy, that some diseases do increase the risk of predation while some may not, should be addressed in the discussion.

Lines 430: Again, you are overselling your results a little. You didn't find that 'specific infections can be associated with higher predation risks', but rather that a single infection was associated with a higher predation risk while multiple others were not.

Table 1: I appreciate that the authors added the extra information that was requested, but that generally requires adjusting the table to accommodate the additional information. This table is now a little difficult to comprehend with the way it is arranged. They should to play around with formatting to make it easier for the reader to digest.

Table 1: Do you have sample sizes for these other studies? Are there any confidence intervals for these prevalence rates?

Reviewer: 1

Comments to the Author(s)

well done- really enjoy this paper

===PREPARING YOUR MANUSCRIPT===

Your revised paper should include the changes requested by the referees and Editors of your manuscript. You should provide two versions of this manuscript and both versions must be provided in an editable format:

one version identifying all the changes that have been made (for instance, in coloured highlight, in bold text, or tracked changes);

a 'clean' version of the new manuscript that incorporates the changes made, but does not highlight them. This version will be used for typesetting if your manuscript is accepted.

Please ensure that any equations included in the paper are editable text and not embedded images.

Please ensure that you include an acknowledgements' section before your reference list/bibliography. This should acknowledge anyone who assisted with your work, but does not qualify as an author per the guidelines at <https://royalsociety.org/journals/ethics-policies/openness/>.

While not essential, it will speed up the preparation of your manuscript proof if accepted if you format your references/bibliography in Vancouver style (please see <https://royalsociety.org/journals/authors/author-guidelines/#formatting>). You should include DOIs for as many of the references as possible.



If you have been asked to revise the written English in your submission as a condition of publication, you must do so, and you are expected to provide evidence that you have received language editing support. The journal would prefer that you use a professional language editing service and provide a certificate of editing, but a signed letter from a colleague who is a native speaker of English is acceptable. Note the journal has arranged a number of discounts for authors using professional language editing services (<https://royalsociety.org/journals/authors/benefits/language-editing/>).

### ===PREPARING YOUR REVISION IN SCHOLARONE===

To revise your manuscript, log into <https://mc.manuscriptcentral.com/rsos> and enter your Author Centre - this may be accessed by clicking on "Author" in the dark toolbar at the top of the page (just below the journal name). You will find your manuscript listed under "Manuscripts with Decisions". Under "Actions", click on "Create a Revision".

Attach your point-by-point response to referees and Editors at Step 1 'View and respond to decision letter'. This document should be uploaded in an editable file type (.doc or .docx are preferred). This is essential.

Please ensure that you include a summary of your paper at Step 2 'Type, Title, & Abstract'. This should be no more than 100 words to explain to a non-scientific audience the key findings of your research. This will be included in a weekly highlights email circulated by the Royal Society press office to national UK, international, and scientific news outlets to promote your work.

At Step 3 'File upload' you should include the following files:

-- Your revised manuscript in editable file format (.doc, .docx, or .tex preferred). You should upload two versions:

- 1) One version identifying all the changes that have been made (for instance, in coloured highlight, in bold text, or tracked changes);
- 2) A 'clean' version of the new manuscript that incorporates the changes made, but does not highlight them.

-- An individual file of each figure (EPS or print-quality PDF preferred [either format should be produced directly from original creation package], or original software format).

-- An editable file of each table (.doc, .docx, .xls, .xlsx, or .csv).

-- An editable file of all figure and table captions.

Note: you may upload the figure, table, and caption files in a single Zip folder.

-- Any electronic supplementary material (ESM).

-- If you are requesting a discretionary waiver for the article processing charge, the waiver form must be included at this step.

-- If you are providing image files for potential cover images, please upload these at this step, and inform the editorial office you have done so. You must hold the copyright to any image provided.

-- A copy of your point-by-point response to referees and Editors. This will expedite the preparation of your proof.

At Step 6 'Details & comments', you should review and respond to the queries on the electronic submission form. In particular, we would ask that you do the following:

-- Ensure that your data access statement meets the requirements at

<https://royalsociety.org/journals/authors/author-guidelines/#data>. You should ensure that you cite the dataset in your reference list. If you have deposited data etc in the Dryad repository, please include both the 'For publication' link and 'For review' link at this stage.

-- If you are requesting an article processing charge waiver, you must select the relevant waiver option (if requesting a discretionary waiver, the form should have been uploaded at Step 3 'File upload' above).

-- If you have uploaded ESM files, please ensure you follow the guidance at <https://royalsociety.org/journals/authors/author-guidelines/#supplementary-material> to include a suitable title and informative caption. An example of appropriate titling and captioning may be found at [https://figshare.com/articles/Table\\_S2\\_from\\_Is\\_there\\_a\\_trade-off\\_between\\_peak\\_performance\\_and\\_performance\\_breadth\\_across\\_temperatures\\_for\\_aerobic\\_scope\\_in\\_teleost\\_fishes\\_/3843624](https://figshare.com/articles/Table_S2_from_Is_there_a_trade-off_between_peak_performance_and_performance_breadth_across_temperatures_for_aerobic_scope_in_teleost_fishes_/3843624).

At Step 7 'Review & submit', you must view the PDF proof of the manuscript before you will be able to submit the revision. Note: if any parts of the electronic submission form have not been completed, these will be noted by red message boxes.

## Author's Response to Decision Letter for (RSOS-201522.R1)

See Appendix B.

## RSOS-201522.R2 (Revision)

### Review form: Reviewer 2

**Is the manuscript scientifically sound in its present form?**

No

**Are the interpretations and conclusions justified by the results?**

No

**Is the language acceptable?**

Yes

**Do you have any ethical concerns with this paper?**

No

**Have you any concerns about statistical analyses in this paper?**

Yes

**Recommendation?**

Major revision is needed (please make suggestions in comments)

**Comments to the Author(s)**

I appreciate that the authors added the GLM analysis that was requested. I think this has greatly improved the quality of the statistics and our ability to interpret the results. However, I have some major concerns remaining, primarily with the way the logistic regression GLM was conducted:

1) Now that the GLM has been conducted, I don't think the individual Fisher exact tests are needed. I think the results from these tests are repetitive and simply serve to confuse the readers.

My guess is that the author's want to include these tests to highlight the odds ratios; however, as I mention in the attached file (Appendix C), odds ratios can be easily calculated by exponentiating the coefficients of a logistic regression.

2) There were some obvious problems with the coefficients of the top logistic regression models that were presented. Some of the covariates in these models have coefficients over 15, meaning they had odds ratios over 3 million!! This is obviously unrealistic. After doing a little investigating by looking at Table 1, I realized all these covariates with large coefficients either had 0% or 100% predated or not predated. That means there were either no values in the numerator or denominator of the odds ratio (just like you couldn't calculate the odds ratio for those diseases in those tissues in those years). Since the coefficient estimates in the logistic regression of the logs of the odds ratio, the coefficient estimates for these covariates aren't realistic. In other words, for your logistic regression model, you can't include any of the diseases for any of the tissues in any year that you couldn't calculate an odds ratio in table 1.

3) The best practice for model selection isn't to just interpret the top model, but to either use model averaging or to pick the most parsimonious model from your top model set. Things may change after you modify which diseases to include in your models, but, currently most of your top models are subsets of one of the top models (i.e., they include all the same covariate plus some some additional ones). If that continues to be the case, you should just use that most parsimonious model as your top model.

## Decision letter (RSOS-201522.R2)

We hope you are keeping well at this difficult and unusual time. We continue to value your support of the journal in these challenging circumstances. If Royal Society Open Science can assist you at all, please don't hesitate to let us know at the email address below.

Dear Dr Furey

On behalf of the Editors, we are pleased to inform you that your Manuscript RSOS-201522.R2 "Infected juvenile salmon can experience increased predation during freshwater migration" has been accepted for publication in Royal Society Open Science subject to minor revision in accordance with the referees' reports. Please find the referees' comments along with any feedback from the Editors below my signature.

We invite you to respond to the comments and revise your manuscript. Below the referees' and Editors' comments (where applicable) we provide additional requirements. Final acceptance of your manuscript is dependent on these requirements being met. We provide guidance below to help you prepare your revision.

Please submit your revised manuscript and required files (see below) no later than 7 days from today's (ie 23-Feb-2021) date. Note: the ScholarOne system will 'lock' if submission of the revision is attempted 7 or more days after the deadline. If you do not think you will be able to meet this deadline please contact the editorial office immediately.

Please note article processing charges apply to papers accepted for publication in Royal Society Open Science (<https://royalsocietypublishing.org/rsos/charges>). Charges will also apply to papers transferred to the journal from other Royal Society Publishing journals, as well as papers submitted as part of our collaboration with the Royal Society of Chemistry (<https://royalsocietypublishing.org/rsos/chemistry>). Fee waivers are available but must be requested when you submit your revision (<https://royalsocietypublishing.org/rsos/waivers>).

Thank you for submitting your manuscript to Royal Society Open Science and we look forward to receiving your revision. If you have any questions at all, please do not hesitate to get in touch.

Kind regards,  
 Royal Society Open Science Editorial Office  
 Royal Society Open Science  
 openscience@royalsociety.org

on behalf of Prof Kevin Padian (Subject Editor)  
 openscience@royalsociety.org

#### Associate Editor Comments to Author:

This paper represents something of a tricky call for the editors. On the one hand, it seems clear the authors are doing their best to meet the concerns raised by the referee, but the referee has a number of outstanding concerns regarding the statistical treatment of work. As the authors have had a number of opportunities to revise, and the referee has - likewise - had a number of opportunities to review, it is not clear how productive continued review-revise-review is going to be. Instead, we are going to make the call that the authors should do what they can to address the remaining concerns in a final revision, and this revision will be assessed by the editors alone - if the latter are satisfied that the paper is publishable, it will be accepted for publication: any remaining concerns that the reviewer and the wider community may have at this stage can then be discussed openly with the paper and data accessible to all. The editors thank the reviewers for their support and the authors for their engagement with the process.

#### Reviewer comments to Author:

Reviewer: 2

#### Comments to the Author(s)

I appreciate that the authors added the GLM analysis that was requested. I think this has greatly improved the quality of the statistics and our ability to interpret the results. However, I have some major concerns remaining, primarily with the way the logistic regression GLM was conducted:

- 1) Now that the GLM has been conducted, I don't think the individual Fisher exact tests are needed. I think the results from these tests are repetitive and simply serve to confuse the readers. My guess is that the author's want to include these tests to highlight the odds ratios; however, as I mention in the attached file, odds ratios can be easily calculated by exponentiating the coefficients of a logistic regression.
- 2) There were some obvious problems with the coefficients of the top logistic regression models that were presented. Some of the covariates in these models have coefficients over 15, meaning they had odds ratios over 3 million!! This is obviously unrealistic. After doing a little investigating by looking at Table 1, I realized all these covariates with large coefficients either had 0% or 100% predated or not predated. That means there were either no values in the numerator or denominator of the odds ratio (just like you couldn't calculate the odds ratio for those diseases in those tissues in those years). Since the coefficient estimates in the logistic regression of the logs of the odds ratio, the coefficient estimates for these covariates aren't realistic. In other words, for your logistic regression model, you can't include any of the diseases for any of the tissues in any year that you couldn't calculate an odds ratio in table 1.
- 3) The best practice for model selection isn't to just interpret the top model, but to either use model averaging or to pick the most parsimonious model from your top model set. Things may change after you modify which diseases to include in your models, but, currently most of your top models are subsets of one of the top models (i.e., they include all the same covariate plus

some some additional ones). If that continues to be the case, you should just use that most parsimonious model as your top model.

### ===PREPARING YOUR MANUSCRIPT===

Your revised paper should include the changes requested by the referees and Editors of your manuscript. You should provide two versions of this manuscript and both versions must be provided in an editable format:

one version identifying all the changes that have been made (for instance, in coloured highlight, in bold text, or tracked changes);

a 'clean' version of the new manuscript that incorporates the changes made, but does not highlight them. This version will be used for typesetting.

Please ensure that any equations included in the paper are editable text and not embedded images.

Please ensure that you include an acknowledgements' section before your reference list/bibliography. This should acknowledge anyone who assisted with your work, but does not qualify as an author per the guidelines at <https://royalsociety.org/journals/ethics-policies/openness/>.

While not essential, it will speed up the preparation of your manuscript proof if you format your references/bibliography in Vancouver style (please see <https://royalsociety.org/journals/authors/author-guidelines/#formatting>). You should include DOIs for as many of the references as possible.

If you have been asked to revise the written English in your submission as a condition of publication, you must do so, and you are expected to provide evidence that you have received language editing support. The journal would prefer that you use a professional language editing service and provide a certificate of editing, but a signed letter from a colleague who is a native speaker of English is acceptable. Note the journal has arranged a number of discounts for authors using professional language editing services (<https://royalsociety.org/journals/authors/benefits/language-editing/>).

### ===PREPARING YOUR REVISION IN SCHOLARONE===

To revise your manuscript, log into <https://mc.manuscriptcentral.com/rsos> and enter your Author Centre - this may be accessed by clicking on "Author" in the dark toolbar at the top of the page (just below the journal name). You will find your manuscript listed under "Manuscripts with Decisions". Under "Actions", click on "Create a Revision".

Attach your point-by-point response to referees and Editors at Step 1 'View and respond to decision letter'. This document should be uploaded in an editable file type (.doc or .docx are preferred). This is essential.

Please ensure that you include a summary of your paper at Step 2 'Type, Title, & Abstract'. This should be no more than 100 words to explain to a non-scientific audience the key findings of your research. This will be included in a weekly highlights email circulated by the Royal Society press office to national UK, international, and scientific news outlets to promote your work.

At Step 3 'File upload' you should include the following files:

-- Your revised manuscript in editable file format (.doc, .docx, or .tex preferred). You should upload two versions:

- 1) One version identifying all the changes that have been made (for instance, in coloured highlight, in bold text, or tracked changes);
  - 2) A 'clean' version of the new manuscript that incorporates the changes made, but does not highlight them.
    - An individual file of each figure (EPS or print-quality PDF preferred [either format should be produced directly from original creation package], or original software format).
    - An editable file of each table (.doc, .docx, .xls, .xlsx, or .csv).
    - An editable file of all figure and table captions.
- Note: you may upload the figure, table, and caption files in a single Zip folder.
- Any electronic supplementary material (ESM).
  - If you are requesting a discretionary waiver for the article processing charge, the waiver form must be included at this step.
  - If you are providing image files for potential cover images, please upload these at this step, and inform the editorial office you have done so. You must hold the copyright to any image provided.
  - A copy of your point-by-point response to referees and Editors. This will expedite the preparation of your proof.

At Step 6 'Details & comments', you should review and respond to the queries on the electronic submission form. In particular, we would ask that you do the following:

- Ensure that your data access statement meets the requirements at <https://royalsociety.org/journals/authors/author-guidelines/#data>. You should ensure that you cite the dataset in your reference list. If you have deposited data etc in the Dryad repository, please only include the 'For publication' link at this stage. You should remove the 'For review' link.
- If you are requesting an article processing charge waiver, you must select the relevant waiver option (if requesting a discretionary waiver, the form should have been uploaded at Step 3 'File upload' above).
- If you have uploaded ESM files, please ensure you follow the guidance at <https://royalsociety.org/journals/authors/author-guidelines/#supplementary-material> to include a suitable title and informative caption. An example of appropriate titling and captioning may be found at [https://figshare.com/articles/Table\\_S2\\_from\\_Is\\_there\\_a\\_trade-off\\_between\\_peak\\_performance\\_and\\_performance\\_breadth\\_across\\_temperatures\\_for\\_aerobic\\_sc ope\\_in\\_teleost\\_fishes\\_/3843624](https://figshare.com/articles/Table_S2_from_Is_there_a_trade-off_between_peak_performance_and_performance_breadth_across_temperatures_for_aerobic_scope_in_teleost_fishes_/3843624).

At Step 7 'Review & submit', you must view the PDF proof of the manuscript before you will be able to submit the revision. Note: if any parts of the electronic submission form have not been completed, these will be noted by red message boxes.

## Author's Response to Decision Letter for (RSOS-201522.R2)

See Appendix D.

## Decision letter (RSOS-201522.R3)

We hope you are keeping well at this difficult and unusual time. We continue to value your support of the journal in these challenging circumstances. If Royal Society Open Science can assist you at all, please don't hesitate to let us know at the email address below.

Dear Dr Furey,

It is a pleasure to accept your manuscript entitled "Infected juvenile salmon can experience increased predation during freshwater migration" in its current form for publication in Royal Society Open Science.

You can expect to receive a proof of your article in the near future. Please contact the editorial office ([openscience@royalsociety.org](mailto:openscience@royalsociety.org)) and the production office ([openscience\\_proofs@royalsociety.org](mailto:openscience_proofs@royalsociety.org)) to let us know if you are likely to be away from e-mail contact – if you are going to be away, please nominate a co-author (if available) to manage the proofing process, and ensure they are copied into your email to the journal.

Due to rapid publication and an extremely tight schedule, if comments are not received, your paper may experience a delay in publication. Royal Society Open Science operates under a continuous publication model. Your article will be published straight into the next open issue and this will be the final version of the paper. As such, it can be cited immediately by other researchers. As the issue version of your paper will be the only version to be published I would advise you to check your proofs thoroughly as changes cannot be made once the paper is published.

Please see the Royal Society Publishing guidance on how you may share your accepted author manuscript at <https://royalsociety.org/journals/ethics-policies/media-embargo/>. After publication, some additional ways to effectively promote your article can also be found here <https://royalsociety.org/blog/2020/07/promoting-your-latest-paper-and-tracking-your-results/>.

Thank you for your fine contribution. On behalf of the Editors of Royal Society Open Science, we look forward to your continued contributions to the Journal.

Kind regards,  
Royal Society Open Science Editorial Office  
Royal Society Open Science  
[openscience@royalsociety.org](mailto:openscience@royalsociety.org)

on behalf of Prof Kevin Padian (Subject Editor)  
[openscience@royalsociety.org](mailto:openscience@royalsociety.org)

Follow Royal Society Publishing on Twitter: @RSocPublishing  
Follow Royal Society Publishing on Facebook:  
<https://www.facebook.com/RoyalSocietyPublishing.FanPage/>  
Read Royal Society Publishing's blog:  
<https://royalsociety.org/blog/blogsearchpage/?category=Publishing>

## Appendix A

### Handling Editor comments:

Associate Editor Comments to Author:

Thank you for the transfer of this paper. Two of the original reviewers have assessed the submission and the changes you have made. One is broadly of the view the paper is on the right track; however, the second strongly feels that you have not engaged satisfactorily with the queries raised in the earlier round of review. We would like you to take their concerns seriously and would highlight that, unless there are exceptional reasons for doing so, we do not routinely permit multiple rounds of major revision: indeed, if the reviewers are not persuaded that you are taking steps to address their concerns in the revision, it is possible your paper will be rejected. With this in mind, please do your best to respond to their concerns both in a tracked-changes version of your revision and also a clear point-by-point response, so the editors and reviewers can see how you tackled the critiques. Good luck and we look forward to reading your revised paper in due course.

***Response: Thank you for providing the reviewer comments. We are happy to hear that both reviewers find value in the paper. We have taken careful care to respond to each comment made by each reviewer, documented below. We feel we have done everything possible to meet the reviewers' requests as closely as possible.***

***Please note that all line numbers mentioned in response to reviewer comments refer to line numbers in the "track-changes" document, not the "clean" version.***

Reviewer: 1

Comment #1: I reviewed this paper in an earlier stage, I still think it's excellent and very interesting and the authors responded to most of my initial comments. I suggest some minor revisions on this version.

***Response #1: We appreciate that the reviewer finds the paper to be excellent and interesting. We also appreciate that the reviewer acknowledges we took their suggestions to heart.***

Minor Comments

Comment #2: L47- rather than saying "few studies", it might be better to quickly summarise what the three studies that have studied this have concluded



**Response #2: We have modified the sentence to summarize that these studies found a link between infection and predation risk.**

Comment #3: L64- given that this virus is a focal point of the analysis, it would be ideal to expand, here or elsewhere, on the ecology of this virus so far as it is known

**Response #3: We have text in the Introduction that incorporates more background on IHNv (L82-87).**

Comment #4: L67- a bit of a throw in to the introduction given that this has not been brought up at all yet- how does it relate? I suggest not to simply delete this, but work in earlier in the introduction how host gene expression can be affected by various biotic and abiotic factors that can affect survival

**Response #4: We have added a paragraph in the Introduction that more fully the VDD panel, including its development, validation, and utility (L59-74).**

Comment #5: L75- in what way was it randomized? There is always selection bias with capture gears that should be acknowledged

**Response #5: In addition to stating that smolts were captured via dipnet (L113) we have added text to also state smolts were pulled at random from a wash bin (L114).**

Comment #6: L80- clarify what information loss is anticipated for smolts frozen at minus twenty

**Response #6: We have added text to state we do not expect information loss due to the short time (up to 72 hours) smolts were left at -20 before transferring to liquid nitrogen or -80 freezer for long term storage (L111-113).**

Comment #7: L82- again could slower or shallower swimming individuals be more vulnerable to dipnet capture? Is there any way to know? Just curious.

**Response #7: We don't think there would be any way to know for sure, but certainly using a dipnet could target slower individuals. If our samples of non-predated smolts is indeed biased towards slow-moving or otherwise compromised individuals, it is possible that these fish have higher impairments than seen in the population. This introduced bias would probably act to dampen the effect sizes we observed (rather than increase) when comparing predated and non-predated fish, which were quite strong, particularly with IHNv. We do also feel that these potential biases towards slow-moving and shallower swimming individuals are likely small. Waters are shallow (< 1 m) so the dipnet is generally sampling the upper half of the water column (rather than a small percentage). In addition, the smolt migrations can be very dense, with the river practically boiling with smolts (sometimes breaking the dipnet). Given the densities of**

*smolts in the river and in our dipnet, it certainly appears to be as random of a sample as possible while still using capture (but we admit this is speculation).*

Comment #8: L158- what is prevalence here? Abundance or LOD value?

***Response #8: We have edited the sentence to make it clear that prevalence refers to percentage of smolts that were positive for an agent (not load).***

Comment #9: L199- have read this paragraph four times and find it quite difficult to decipher what is being communicated.. consider revising for clarity

***Response #9: We agree that this paragraph could be improved. We have re-written to improve clarity (L243-250).***

Comment #10: L222- should be i.e. (in other words) not e.g. (for example)

***Response #10: Good catch! Edit made.***

Comment #11: L253- discuss whether this is additive or compensatory mortality

***Response #11: Although we feel it would be too speculative to assign all of this mortality as compensatory, we have amended this statement to more clearly link that we feel the mortality observed in Jeffries et al (2014) was at least partially explained by predation in our study. But see our response to Comment #16 regarding additional discussion of predation on salmonids.***

Comment #12: L257- alt+248 will give you the symbol for degrees

***Response #12: Thank you; we are using the proper symbol now.***

Comment #13: L261- detectability of the smolt?

***Response #13: We believe the detectability of the smolt is included in “the predator’s propensity to target the smolt” (greater detectability, greater propensity). No edits made based on this comment.***

Comment #14: L268- any other of the work from the Miller lab that has revealed the spatial or species distribution of this virus?

***Response #14: We have added additional text to the Introduction (where we felt it fit a bit better and in response to other reviewer comments), to state that IHNV’s current broader geographic range (North America, Europe, and Asia) and that the virus largely infects fish in freshwater and is most effective at infecting fish at temperatures 10-12 (L82-86).***

Comment #15: L274- is this related to relative infection burden, defined in several papers by Teffer and Bass?

***Response #15: Relative infection burden (RIB) would be another way to assess these data; however Reviewer 2 specifically requested a Shannon diversity index. So we have amended our methods and results, along with this paragraph in the discussion, to reflect our new analyses. However, in response to this comment we do add that RIB exists as another metric with the relevant citation (L323).***

Comment #16: L372- this discussion is lacking a discussion on the fundamentals of predation, especially the role of compensatory compared to additive mortality and what the implications are for salmon ecology. There are several other papers about salmon predation and the role of predators.. for Atlantic salmon there are some papers on cormorant predation as well as trout and cod, and striped bass predation. There is a Wood et al. paper re- merganser predation on Pacific salmon. There is a lot of anti-predator narratives that are clearly informed by the findings here that should be addressed more explicitly in the discussion.

***Response #16: We have added an additional paragraph (L330-337) in the Discussion dedicated to this topic, including citing some of the papers/systems mentioned by the reviewer, to state how predation can be compensatory, but that these interactions are difficult to quantify. We also made some minor changes to the final paragraph to help tie in this earlier paragraph (L439-440).***

Comment #17: L379- Lennox et al. Biol Conserv provides a comprehensive discussion of this

***Response #17: This is a good and very relevant reference; it has been added.***

Reviewer: 2

Comments to the Author(s)

Comment #1: Furey et al examine the differential consumption of infected salmon smolt by bull trout in British Columbia, Canada by screening consumed smolts for the presence of 17 infectious agents. As I mentioned in my last review, I think this is an interesting study that has some very interesting implications. However, I think the reviewers raised a number of valid concerns in the last review that were not adequately addressed by the authors. In a few cases, I learned more about the study, and information relevant to the study, from the responses to the reviewers rather than from the manuscript. In this review, I tried to point out where that information would be useful to have in the text. As a result, I still think this paper has a number of weaknesses that need to be addressed. My one major concern is that the statistical analysis needs to be changed from multiple

Fishers exact tests to a mixed effects glm approach with model selection (e.g. information criterion) to account for the lack of independence. My more specific comments related to the manuscript are below.

***Response #1: We appreciate that the reviewer still finds this study interesting with very interesting implications. We have attempted to address the weaknesses pointed out by the reviewer (detailed in our responses below), including to take care to insert salient points into the manuscript itself in addition to our direct response to the reviewer. We attempted to use a glmm approach, as requested by the reviewer, but it was not successful due to limitations of our data (primarily singularity issues that result due to unbalanced sampling design and interannual variability in pathogen prevalence); we detail these issues fully in Response #7 below. We hope that we are able to demonstrate that we took the reviewer's suggestion to heart, attempted to completely redo our analyses, but simply could not due to limitations of our data.***

## Introduction

Comment #2: Lines 64-65 – There is only one sentence for IHNv in the introduction, whereas it seems like IHNv is the major focal disease of this paper based on later descriptions in the results and discussion. I suggestion setting up this disease as a major focus by providing a broader description of this disease, its life history, and its impacts on salmonids.

***Response #2: We agree, as did Reviewer 1. We have added text in the Introduction to provide better background on INHv (L82-87).***

## Methods

Comment #3: Lines 82-83 – I appreciate that this was an opportunistic study and there was insufficient funding to collect adequate samples in 2015. However, this should be acknowledged in the text. It would be valuable to make a comment here about how the sample sizes were decided upon and, in the discussion, make a comment that it would be valuable to have more samples of the non-predated fish to have a better sample of the prevalence of the disease throughout the population. I realize that you couldn't sample more of the non-predated smolts due to funding issues, which is no fault of your own, but is still a weakness of your study. I think we should all acknowledge the weaknesses of our studies in our papers so that the next studies that build on our research can use our experiences to improve their designs.

***Response #3: We have now stated in the Methods why the sample size of non-predated fish was so low – funding and a field season cut short by high waters (which affected our other research in the system) (L116-118).***

Comment #4: Lines 91-92 – I previously made the suggestion to add some indication of what the prevalence of the diseases throughout Chilko Lake to Table one. The authors ignored this suggestion, but I still think this would be extremely important to have since your sample sizes of the non-predated fish were so small. I noticed in response #10 to referee 2 that interannual variability is being assessed using monitoring programs. In that same response, you also cite some of your own groups work in the system that provides some estimates of disease prevalence rates, so it appears these data exist.

***Response #4: We have added a couple of columns to Table 1 to show the prevalence rates of pathogens observed in either Jeffries et al. (2014) or Stevenson et al. (2020). Please note that these are only for a limited number of pathogens and sample sizes in these studies were low in some years. We do not consider these, from a sockeye salmon population perspective, a comprehensive examination or screening of pathogens. Samples have been taken for monitoring over the past several years as part of the Strategic Salmon Health Initiative but these data are not yet available to publish. This is why we stated in our previous response to the reviewer that the broader prevalence of infectious agents in the lake environment is unknown.***

Comment #5: Lines 97-98 – I had no idea that the VDD panel was not an ‘accepted or standard approach to classifying fish as diseased or not’ until I read the comments of reviewer four. Since that is what you are using to assess the disease state of your fish, and the entire conclusions of your paper depend on the diseased state of consumed and non-consumed fish, that seems like a key piece of information that should better described in the paper. I recommend the authors spend a few sentences in the methods briefly summarizing the important conclusions from Miller et al. 2017 (rather than chastising reviewer #4 that they need to read Miller et al. 2017). Much of the information that I think would be important for readers to have appears in response #19 to reviewer 4. In my opinion, a well written paper is one where there is sufficient information to justify the work without having to go and read another paper.

***Response #5: We have added a paragraph to the Introduction (L59-74; we felt it was better placed here than in the Methods and more likely to be digested by the reader, no pun intended) that introduces and defines the VDD approach and how it was validated in Miller et al. to hopefully give the reader a better understanding and confidence in the approach. Human diagnostics are also moving to similar biomarker-based approaches, and it was, in fact, developments in the human diagnostics field that spurred the development of the VDD panel in salmon. Interestingly, half of the biomarkers that are predictive of a viral disease state in salmon are shared with those uncovered to recognize respiratory viral infections in humans, and differentiate them from bacterial respiratory infections. Simply, we used a more modern approach, with a***

*precedence in human medicine, and made substantial, and peer-reviewed, efforts to validate the approach, especially for application with IHNV. More of this detail is now in the paper.*

*We also apologize if our response to the reviewer was seen as chastising, that was not the intent. However, we firmly believe that the VDD approach, although a more modern and less used approach relative to traditional epidemiological research, is indeed a validated (and thus accepted) approach.*

Comment #6: Lines 147-148 - How did you select these genes? Was this based on previous research that indicated these genes would not be degraded across samples? If not, was it based on the analysis of the genes from this study? If so, how can you be positive that this isn't some other artifact of the five samples that you ended up removing?

*Response #6: The Reference genes were originally developed in the Miller laboratory almost a decade ago based on extensive analysis of in-house microarray datasets across multiple tissues, species, and experimental studies. They have been applied as TaqMan assays in many of our transcriptomic studies (e.g. Miller et al. 2014, Jeffries et al. 2014), where we often additionally apply normfinder or other similar software to ensure that they are behaving as expected. We have no evidence that these genes were not behaving as expected.*

Comment #7: Lines 158-160 – Running a single Fisher’s exact test for each pathogen for each tissue and year is statistically inappropriate. First of all, you have tissues which are collected from the same fish. Because they are collected from the same fish they are not independent from each other. This could potentially help to address some of the concerns of reviewer #4 comment 10 – where you have different responses of the same tissue within the same fish. Then you have pathogens that are collected from the same river in the same year. I suspect that different pathogens may be correlated with environmental conditions (i.e. temperature, flow, etc); therefore, it is likely that different pathogens likely have a higher occurrence in one year than in another year. This needs to be analyzed in a mixed effects logistic regression model with individual fish as a random effect and year, pathogen, and tissue as fixed effects. The authors should also include fish length as a covariate, since the authors also run a posthoc test comparing the fork length of IHN+ and IHN- fish. This would also make sense since fish size is certainly related to fish predation and may also be related to susceptibility to disease. A glm framework would be necessary to tease out these idiosyncrasies. As the authors suggested, you can also look at interactions between year and pathogen, but based on your small sample size, I’m almost positive you will not have a sufficient sample size to detect those interactions. The wonderful thing about using AIC to select the most parsimonious model is that it will

only let you fit as complex a model as your data will allow. As the authors state, the output from a logistic regression can be expressed as odds ratios, which is the same as what they express here.

***Response #7: There are several pieces to unravel here, and we will do our best to address each point (but felt this entire section was motivated by one issue – our statistical approach). Simply, we attempted to follow the reviewer’s suggestion, but the data are not amenable to this glmm approach. Based on our best interpretation of the reviewer’s suggestion, we would run models of the form (including pathogens a – i):***

***Predation(1/0) ~ infection(pathogen<sub>a</sub>)+infection(pathogen<sub>b</sub>)+...+infection(pathogen<sub>i</sub>) + Year + FL + Tissue + (FishID\_random).***

***This framework is problematic given our dataset for several reasons. In fact, we attempted to run some of these models, and experienced several problems, detailed below.***

- ***Most importantly, given that some pathogens are only seen in certain tissues or in certain years, we have issues of singularity. Models become singular if the parameter estimates are on the boundary of the feasible parameter space – variances of one or more linear combinations of effects are zero or very close to zero (paraphrased from lme4 package helpfiles). In more practical terms, singularity can indicate overfitting of low-power models (such as ours) and increase chances of numerical errors. Our most important pathogen, IHNv, is a perfect example. When attempting to run a GLMM as constructed above, we run into singularity because IHNv is only found in one of years, and not the other (so the model cannot determine the impact of the infection vs year on predation). We tried to run these models in response to the reviewer comment, and they simply would often not converge or result in singularity (so they would run, but difficult to trust the results). If we then ran models only for pathogens and years in which they were present, which would alleviate some of these singularity issues, we would then be left with varying sample sizes among models, rendering AIC and the desired approach from the reviewer having little utility. We hope the reviewer understands that we spent a substantial amount of time developing and attempting these models, but it was clear our data do not have the sample size (nor consistent enough prevalence of all pathogens between years and tissues) to use this approach. Further justification against this approach is given below.***
- ***Given that we screened 17 pathogens (10 of which were observed), either the presence of each pathogen would be included as its own explanatory variable in the same global model as stated in our theoretical formulation above (which we***

- also do not have the power for), or we would need to run 10 separate global models (as we did with IHNv noted above), and then conduct subsequent model selection for each. This would quickly turn the entire paper into a modelling exercise, and I'd argue with greater issues of multiple comparisons than our approach has currently (where we help account for this by using a false discovery rate-adjusted p-value).*
- *Adding year as an explanatory variable in models predicting predation status is also problematic because our sample sizes (of predated vs not predated fish) are not balanced between the two years. Our models would suggest that a fish is more likely to be predated in the second year, simply because a greater proportion of our samples were indeed from bull trout stomachs (because we were financially limited in running further non-predated sample and our field season was cut short due to high flow conditions in the Chilkco River). This was a large reason why we ran analyses on separate years. The alternative would be to have infection status be the response variable, with predation status and year (as well as the others the reviewer desired) as explanatory variables, but this would be investigating a fundamentally different hypothesis (what influences probability of infection, rather than predation).*
  - *We also respectfully disagree that lack of independence is a substantial issue here. Non-independence is of greatest issue when the assumption of independence is broken within an analysis; here we have separated out each tissue into their own analyses (as the reviewer, and other reviewers, have stated, we expect different responses from infectious agents in different tissues). To account for this properly, it would require an interaction term between the specific infectious agent and tissue, which would further exacerbate our low power (which the reviewers again acknowledged). Similarly, the reviewer argues we need to include year as a covariate into a glmm to determine if prevalence rates differ among years. Excluding the year in analyses would indeed be an issue if we conducted analyses that combined data between years; however we clearly demonstrate the interannual variability in infectious agent prevalence between both years (Table 1). And we have demonstrated previously why year as a covariate in a glmm framework is problematic.*
  - *In response, we instead use Fisher's exact tests on tissue-year combinations with post-hoc analyses to investigate potentially confounding factors (fish length). We do account for the repeated testing by using a false discovery rate (fdr). We would also like to note that in terms of identifying large effects, our approach was successful, highlighting the importance of IHNv, and using the fdr-adjusted p-values prevented us from overinterpretation of other infectious agents for which the effects were smaller.*



Comment #8: Line 164 – I agree with reviewer #4 that species richness has a specific definition in ecology. The count of the number of infectious agents per sample may not be the most appropriate response to assess if species richness had an effect. I think Shannon’s diversity index, which takes into account both the count and the abundance (which in your case would probably be cycle threshold) would probably be more appropriate.

***Response #8: We have now replaced the unique number of infectious agents with a Shannon diversity index (new Figure 1). The results, in terms of overall trends, are the same (greater infectious agent diversity in both tissues in 2014, with no significant differences in either tissue in 2015). Methods (L201-204), Results (L235-241), and Discussion have been edited to reflect this change in methods.***

Comment #9: Line 175 – This is the first place in the text where I got the impression that IHNv is a focal disease of this paper. I had to go back to the introduction to realize that there was one sentence where you specifically mention this disease. As someone who isn’t specifically familiar with this disease, I suggest spending a little more time in the introduction to describe the importance of this disease and the possible population level implications it may have for salmon.

***Response #9: We agree (and Reviewer #1 did as well). We have added additional text to the Introduction (L82-87) to better introduce IHNv to complement the text already in the Discussion.***

Comment #10: Line 228-229 – As I previously suggest, fork length should be included as a covariate in the mixed effects logistic regression.

***Response #10: Please see Response #7 above.***

## Discussion

Comment #11: Lines 254-268 – Some of this paragraph should be moved to the introduction

***Response #11: We have now better introduced IHNv in the Introduction (L82-87).***

## Tables

Comment #12: Table 1 – a percent without a sample size is not very valuable. Furthermore, please calculate the standard errors for these percentages. There is a simple equation to calculate the standard error of a proportion.

***Response #12: Sample sizes have been added to the table caption. Standard errors have also been added.***

Supplemental material

Comment #13: .csv files – my comment regarding the metadata for the supplemental material was primarily regarding the .csv files. I would like you to provide a excel or text file (.doc or .txt) that describes the content of all the columns in each of your .csv files in relatively easy to understand language.

***Response #13: We apologize if our metadata were not able to be found. In response to the reviewer’s comment in the previous draft, we did develop an Excel file that did provide a “dictionary” for each column as the first sheet. The name of this file, submitted to Dryad, is “SampleMetadata\_UsedforPub” and the first sheet is titled “Dictionary” and can still be accessed for review. This is my first time using Dryad for a submitted paper, so I apologize if these materials were not properly available to reviewers. The data submission can also be accessed via this link:***

***[https://datadryad.org/stash/share/-0kK4Evaal9gKPdeFOGhJWz\\_e\\_JvuK0BQFYK5eMnZQM](https://datadryad.org/stash/share/-0kK4Evaal9gKPdeFOGhJWz_e_JvuK0BQFYK5eMnZQM)***

## Appendix B

Associate Editor Comments to Author:

Given that the authors seem to have tried hard to improve the paper but one of the reviewers still has some concerns, it is fair to offer the authors a final opportunity to revise, but they should be aware this is the final opportunity they will have.

***Response: Thank you, and we appreciate that our hard work has been evident. We understand that this is our final opportunity, and hope the reviewer appreciates the lengths we went to meet their demands. We also hope the Associate Editor and reviewer can appreciate the value of this story – that even with a complicated system and limited sample size, we were able to observe this link between infection and predation. Regardless, we appreciate the efforts of all of the reviewers that have been involved with this manuscript.***

***All line numbers referred to in our response below correspond to the track-changes document (rather than the “clean” version).***

Reviewer comments to Author:

Reviewer: 2

Comments to the Author(s)

Comment #1: In general, Furey et al. did a good job addressing my comments, especially in the introduction. I still have some large concerns with the analysis, that I believe the authors can address relatively quickly, if given the opportunity. I also have some concerns that the authors tend to oversell their results in the discussion. Specifically, the results show that the only disease that appeared to increase the susceptibility to predation was IHNV, which was only present in one year. In contrast, other diseases that appeared to be much more prevalent, did not increase predation rates. However, the authors did not mention this dichotomy in the discussion at all. I think this is a major oversight that can have some major implications. I recommend the authors temper their conclusions in the discussion to better represent that they only found that one disease increased predation rates, while other diseases appeared to have minimal effect.

Perhaps there are differences in these diseases and the way that they influence fish behavior that influence the fish's susceptibility to predation.

***Response #1: We appreciate the reviewer felt that overall, we did a good job in addressing their comments. Focusing on IHNV's impacts to us is not “overselling” the results relative to the pathogens that are not linked to mortality, but rather we focus on this result because it is so striking (and makes sense, given the literature on this infectious agent). Rather than temper our conclusions, we instead add text to the Discussion that clearly recognizes that most infectious agents did not result in increased predation risk, which is expected (L359-367); we agree this is an important addition that we overlooked. Please note that infection does not equate into disease (all of us, and animals, have several infectious agents in our systems, but disease is only experienced at specific agent-load levels). So our results demonstrate that most infections we saw did not result in increased predation risk, rather than disease. We also add text in the Discussion (L338-358) to place some of the new results***

***(see response to comments below) in context, including increased discussion of other pathogens.***

Specific comments:

Comment #2: Line 124 – Was using fish in the best digestion condition necessary to prevent degradation of the disease DNA? Could this have influenced your analysis later where you compared condition of the consumed and non-consumed fish?

***Response #2: Yes, we wanted to minimize the potential degradation of the infectious agent by selecting the best digestion individuals. Yes, it is possible that even worse condition individuals could have experienced further degradation than we observed. We discuss the potential impacts of our sampling methodology, and potential biases due to degradation, (L388-405 and 458-487).***

Comment #3: Line 195-198 – Based on the discussion that we've been having; it is apparent that this is a complex dataset that requires some careful consideration in how it is analyzed. I appreciate that the authors put the effort into attempting the mixed effects model, unfortunately without success. However, I still don't believe that individual Fisher's exact test for each tissue and year is the correct way to analyze these data. The main problem with the GLM that I suggested appeared to be the year effect, due to the singularity issue. I will list what I think is required at a minimum and then make some additional recommendations for some added complexity that I think would improve the analysis:

1) At a minimum the authors should fit a logistic regression where the response is whether or not a fish was predated and the covariates are: a) whether or not that fish was infected with the single disease (e.g. IHNV) the authors want to test, b) fish length, c) the tissue (gill or liver) tested, d) a year effect for the diseases that occur over multiple years. Fish length needs to be included in this GLM, rather than using a second t-test later as the authors currently do. Fitting one model to test whether disease increases predation risk and a second to test if there is an effect of length on predation is inappropriate, because any results from these tests will give you false precision since you are doing two separate tests and assuming independence between them. However, it is the same fish getting eaten, so they cannot be independent. If the authors have further difficulty getting the models to converge, I highly encourage them to consult with a statistician or quantitative ecologist that can help them through the analysis.

2) It might also be interesting to try to fit a model that includes multiple diseases, but I recommend that the authors only include the most prevalent diseases (e.g. *Candidatus Branchiomonas cisticola*, *Flavobacterium psychrophilum*, *ichthyophthirius multifiliis*, *Infectious hematopoietic necrosis virus*, *Pacific salmon parvovirus*). That will greatly reduce the number of parameters in your model, since it appears fairly obvious without using statistics that none of the other diseases will come out as significant.

3) Another option, if you did want to show the effect of all disease on predation risk, would be to fit a multivariate GLM. But that would be considerably more complex and not necessary for your purposes.

***Response #3: We have conducted additional analyses. However, they are not exactly as prescribed by the reviewer, for the reasons we discuss below (as well as in the Methods; L119-217, Results L250-263, and Discussion L338-358 and 426-434. The reviewer requested both a global model including both years "for diseases that occur over multiple years" but also to "try a model that includes multiple diseases." Even here, it is unclear how many models the reviewer actually wants presented, and recognizes the complexity of our data. This also speaks to (as noted in our previous revision and***

*response to reviewers, and by the reviewer above) that because some pathogens are only found in one year or the other, it is difficult to assess multiple pathogens simultaneously AND include year as a covariate. It's also unclear what adding year as a covariate would provide beyond our current analyses (the reader can easily assess the relative impacts of an agent on predation risk, and overall prevalence, between both years).*

- *Including tissue is nonsensical as an explanatory variable for models attempting to explain probability of predation (predation binary as response variable). The coefficients from this value would simply reflect the number of samples taken for each predation group for each tissue. It would not reflect differences in the relationship between predation probability and infectious agents between tissues without including an interaction (agent1 \* tissue), and given our sample size, we cannot include interactions between each agent and tissue.*
- *Only including the "most prevalent" pathogens is also not a sound a priori modeling decision. The most virulent pathogens generally occur at lower prevalences (because in many cases, except at extremely high host densities, hosts perish rapidly and are unable to pass on the infection). As stated in our paper, there is other work pointing to IHNV affecting survival, with population-level prevalence rates at <15%. In reality, the fact that a given pathogen occurs at high prevalence is a likely indication that it is NOT virulent. Furthermore, it is simply not good science to hand-pick the pathogens to assess, particularly when the reviewer wants a more comprehensive analysis than what we have presented previously.*
- *Similarly, although adding FL is a good idea to a modeling framework, this only acts to assess the independent impact of fish length on predation risk – understanding how the relationship between predation ~ FL is affected by pathogens would require interaction terms (which due to sample size, we cannot explore) or further post-hoc assessments such as those we provided (size distributions of infection-positive vs infection-negative fish).*

*In light of this, while also attempting to provide a more comprehensive analysis as requested by the reviewer, we added the following generalized linear modelling (GLM) framework to our paper (also described in the Methods L 199-217).*

- *Four global models were constructed, one for each year-tissue combination (so 2014-gill, 2014-liver, 2015-gill, and 2015-liver)*
- *Predation status was the response variable (as requested)*
- *Explanatory variables included: FL and presence/absence of infectious agents. Only infectious agents that were detected at least twice in a given tissue-year combination were included (this helped ensure a large enough sample size to have faith in a result in as consistent of a manner as possible). Infectious agents that were found among all samples, predated and not, were not included (as these would thus have no impact on predation risk).*
- *Another confounding factor in smolt lengths is smolt age. Two age classes emigrate from Chilko Lake, with Age-1 smolts constituting on average ~96% of the migrating population, while age-2 are substantially larger but make up ~4% of the migration. Thus length is confounded by age. Age 2 fish were only sampled in 2014, with 8 of the 32 predated smolts being age-2 (no control fish were age 2). Thus, age-2 smolts were removed from 2014 GLM analyses, as they were only present in the predated group (and thus age and FL were confounded).*

- ***We used all subsets regression to rank candidate models via AICc. But to prevent overfitting due to our small sample sizes, the maximum number of parameters in each candidate model was limited to three (not including the intercept).***

***Overall, these models still identified the main result – that IHNV strongly increased predation risk. However, some other interesting results emerged, including smaller smolts at higher risk of predation, and potential increase in predation risk associated with Ichthyophthirius multifiliis. Please see our new Results (L250-258) and Table 2) and Discussion (L338-358) on these topics. These models do represent an improvement to the paper. However, we feel these analyses work best in addition to, rather than in replacement of, our former results. This is largely due to the inability to include all pathogens within global models (and given this is the broadest published screening of infectious agents in this population to-date, it is important to publish the prevalence rates and odds-ratio associated with predation in a straightforward manner) and that we had to do further subsetting of the data to run the models.***

Comment #4: Lines 220-224: See my recommendation above about testing the effects of length on IHNV infection. If the authors want to disentangle the effect of fish length and disease on predation rates, these need to be included in the same model. Currently, the authors are testing the hypothesis that there is no difference in length between IHNV infected fish. But, it is still possible that the consumed IHNV fish were smaller than all other fish.

***Response #4: Please see our new GLM analyses and response to the broader comment. We do see evidence of size-based selection, but it still appears that this effect is independent of IHNV infection (which is logical, based on the speed at which IHNV causes disease, as described in our paper). Please note that even the reviewer's suggested modelling framework would have not identified if "consumed IHNV+ fish were smaller than all other fish" without including an interaction term, which our study sample size simply would not allow.***

Comment #5: Line 275-280: It's unclear to me how these tests differs from the tests the authors describe on lines 220-224.

***Response #5: We are confused by this comment, because lines 220-224 referred to comparisons of fish length, while lines 275-280 referred to comparisons of fish condition. No changes to the text have been made from this comment.***

Comment #6: Lines 302-316: I think somewhere in here you should comment on the differences between IHNV and the other diseases. You observed an increased risk of predation with IHNV, but not with any of the other infections, based on what you know of these diseases, can you formulate some hypotheses about why you observed those results?

***Response #6: In our Discussion, we do have a paragraph describing why IHNV is unique – in terms of its ability to infect, cause disease, and affect mortality of juvenile sockeye salmon. Simply, IHNV has long been known to cause acute disease and mortality, particularly in juvenile salmonids, relative to many of the other infectious agents we screened (L323-327). The infectious agents we screen are quite diverse, and thus should not be expected to behave similarly (some are viruses, others bacteria, others parasites). However, in response to this comment as well as a previous one, we have added text in the Discussion to clearly acknowledge that most infectious agents do not cause an increase in predation***

*risk (L359-367).*

Comment #7: Lines 330-331: Specifically, you provide evidence that infection with one specific disease can increase risk to fish in the wild. In fact, two other diseases, that appear to have higher prevalence in your samples and in the system, didn't have any impact on predation. It seems like you are ignoring that result to focus on the single positive result that you had. I find it really interesting that there appear to be some diseases that don't increase the risk of predation. I think that dichotomy, that some diseases do increase the risk of predation while some may not, should be addressed in the discussion.

***Response #7: It is important to make the clear distinction between an infection and disease (see L55-58 and L359-360). Infection is simply when a pathogen (something that could cause disease) is present. Infection can occur without disease (similar to how many with COVID19 are asymptomatic). Every animal has several infections at any given time, but that does not mean they are diseased. Disease is when an organism's function is affected by the presence of an infection. Although our use of VDD genes allows us to identify potential smolts that are experiencing disease, the reviewer here is focusing our prevalence rates of infections. It is not surprising, rather expected, that infectious agents can be present without increasing predation risk. Particularly, when infectious agents are at very high prevalence rates (90+% as we observe in the couple pathogens noted by the reviewer), is highly likely they do not cause disease in that given host (unless we were witnessing an epidemic before our eyes) or at least not strong enough disease to impact survival (think of the common cold). We have added text to recognize that most infectious agents will not increase predation risk (L359-367).***

Comment #8: Lines 430: Again, you are overselling your results a little. You didn't find that 'specific infections can be associated with higher predation risks', but rather that a single infection was associated with a higher predation risk while multiple others were not.

***Response #8: We do not understand this comment. IHNv is a 'specific infection' – we do not claim that many or all infections result in increased predation risk. We did not edit the text based on this comment. In addition, the new models requested by the reviewer suggest at least one other pathogen could be linked to predation.***

Comment #9: Table 1: I appreciate that the authors added the extra information that was requested, but that generally requires adjusting the table to accommodate the additional information. This table is now a little difficult to comprehend with the way it is arranged. They should to play around with formatting to make it easier for the reader to digest.

***Response #9: We have made additional adjustments in Word (changing column widths throughout, further reducing font size) but indeed a lot of information was asked for. We are hopeful that further organization can be done at the typesetting phase, if we are fortunate enough to publish.***

Comment #10: Table 1: Do you have sample sizes for these other studies? Are there any confidence intervals for these prevalence rates?

***Response #10: We have decided to replace info from these others studies, that felt awkward, with results from provincial screening of infectious agents in this population of juvenile sockeye salmon smolts from mixed tissues (via the Strategic Salmon Health Initiative). We were able to acquire these data between the previous revision and now, and permission to use here. See amendments to Table 1. We include ranges of sample sizes in the Table caption. However, due to space constraints (already***

***noted by the reviewer in Comment #9), we did not include confidence intervals of these prevalence rates (but with proportions these can be calculated from the sample size).***

Reviewer: 1

Comments to the Author(s)

Comment: well done- really enjoy this paper

***Response: We are glad that someone did enjoy the paper. Thank you for your continued support of this paper and seeing value in it.***



**Appendix C****ROYAL SOCIETY  
OPEN SCIENCE****Infected juvenile salmon can experience increased  
predation during freshwater migration**

|                               |                                                                                                                                                                                                                                                                                                                                                                                                                                                                                                                                                                                                                                                                                                           |
|-------------------------------|-----------------------------------------------------------------------------------------------------------------------------------------------------------------------------------------------------------------------------------------------------------------------------------------------------------------------------------------------------------------------------------------------------------------------------------------------------------------------------------------------------------------------------------------------------------------------------------------------------------------------------------------------------------------------------------------------------------|
| Journal:                      | <i>Royal Society Open Science</i>                                                                                                                                                                                                                                                                                                                                                                                                                                                                                                                                                                                                                                                                         |
| Manuscript ID                 | RSOS-201522.R2                                                                                                                                                                                                                                                                                                                                                                                                                                                                                                                                                                                                                                                                                            |
| Article Type:                 | Research                                                                                                                                                                                                                                                                                                                                                                                                                                                                                                                                                                                                                                                                                                  |
| Date Submitted by the Author: | 26-Jan-2021                                                                                                                                                                                                                                                                                                                                                                                                                                                                                                                                                                                                                                                                                               |
| Complete List of Authors:     | Furey, Nathan; University of New Hampshire, Biological Sciences<br>Bass, Arthur; The University of British Columbia, Forest and Conservation Sciences<br>Miller, Kristi; Fisheries and Oceans Canada - Pacific Biological Station, Molecular Genetics Section<br>Li, Shaorong; Fisheries and Oceans Canada - Pacific Biological Station, Molecular Genetics Section<br>Lotto, Andrew; The University of British Columbia, Forest and Conservation Sciences<br>Healy, Stephen; Fisheries and Oceans Canada Pacific Region, Science Branch<br>Drenner, S; Stillwater Sciences; University of California Santa Barbara<br>Hinch, Scott; The University of British Columbia, Forest and Conservation Sciences |
| Subject:                      | behaviour < BIOLOGY, ecology < BIOLOGY, molecular biology < BIOLOGY                                                                                                                                                                                                                                                                                                                                                                                                                                                                                                                                                                                                                                       |
| Keywords:                     | predator-prey interactions, infectious hematopoietic virus, migratory culling, migration ecology, predation risk, Pacific salmon                                                                                                                                                                                                                                                                                                                                                                                                                                                                                                                                                                          |
| Subject Category:             | Organismal and Evolutionary Biology                                                                                                                                                                                                                                                                                                                                                                                                                                                                                                                                                                                                                                                                       |
|                               |                                                                                                                                                                                                                                                                                                                                                                                                                                                                                                                                                                                                                                                                                                           |

SCHOLARONE™  
Manuscripts

**Author-supplied statements**

Relevant information will appear here if provided.

***Ethics***

*Does your article include research that required ethical approval or permits?:*

Yes

*Statement (if applicable):*

This research was approved by the University of British Columbia Animal Ethics Committee (animal care permit: A11-0125) in accordance with the Canadian Council of Animal Care.

***Data***

*It is a condition of publication that data, code and materials supporting your paper are made publicly available. Does your paper present new data?:*

Yes

*Statement (if applicable):*

Data are deposited at the Dryad Digital Repository (<https://doi.org/10.5061/dryad.12jm63xw2>).

URL for review: [https://datadryad.org/stash/share/0kK4EvaaL9gKPdeFQGhJWz\\_e\\_JvuK0BQFYK5eMnZQM](https://datadryad.org/stash/share/0kK4EvaaL9gKPdeFQGhJWz_e_JvuK0BQFYK5eMnZQM)

***Conflict of interest***

I/We declare we have no competing interests

*Statement (if applicable):*

CUST\_STATE\_CONFLICT :No data available.

***Authors' contributions***

This paper has multiple authors and our individual contributions were as below

*Statement (if applicable):*

NBF, ALB, KMM, and SGH conceived and planned the work. NBF, ALB, SJH, AGL, and SMD contributed to field sampling. ALB, SL, KMM led laboratory processing. NBF and ALB conducted analyses. All authors wrote, edited, and gave final approval for submission of the manuscript.

1 **Infected juvenile salmon can experience increased predation during**  
2 **freshwater migration**

3 Nathan B. Furey<sup>\*a</sup>, Arthur L. Bass<sup>b</sup>, Kristi M. Miller<sup>c</sup>, Shaorong Li<sup>c</sup>, Andrew G. Lotto<sup>b</sup>, Stephen  
4 J. Healy<sup>d</sup>, S. Matthew Drenner<sup>ef</sup>, and Scott G. Hinch<sup>b</sup>

5  
6 <sup>a</sup> Department of Biological Sciences, University of New Hampshire, Durham, USA

7 <sup>b</sup> Department of Forest and Conservation Sciences, University of British Columbia, Vancouver,  
8 Canada

9 <sup>c</sup> Fisheries and Oceans Canada, Molecular Genetics Section, Pacific Biological Station,  
10 Nanaimo, Canada

11 <sup>d</sup> Fisheries and Oceans Canada, Science Branch, Pacific Region, 4160 Marine Dr., West  
12 Vancouver, BC, V7V 1N6, Canada

13 <sup>e</sup> Stillwater Sciences, 555 W. Fifth St, 35th floor, Los Angeles, CA 90013; Marine Science  
14 Institute

15 <sup>f</sup> University of California Santa Barbara, Santa Barbara, USA

16 \* Corresponding author: [Nathan.Furey@unh.edu](mailto:Nathan.Furey@unh.edu)

18

**Abstract**

Predation risk for animal migrants can be impacted by physical condition. Although size- or condition-based selection is often observed, observing infection-based predation is rare due to the difficulties in assessing infectious agents in predated samples. We examined predation of outmigrating sockeye salmon (*Oncorhynchus nerka*) smolts by bull trout (*Salvelinus confluentus*) in southcentral British Columbia, Canada. We used a high-throughput quantitative polymerase chain reaction (qPCR) platform to screen for the presence of 17 infectious agents found in salmon and assess 14 host genes associated with viral responses. In one (2014) of the two years assessed (2014 and 2015), presence of infectious haematopoietic necrosis virus (IHNV) resulted in 16-25 times greater chance of predation; in 2015 IHNV was absent among all samples, predated or not. Thus, we provide further evidence that infection can impact predation risk in migrants. Some smolts with high IHNV loads also exhibited gene expression profiles consistent with a virus-induced disease state. Nine other infectious agents were observed between the two years, none of which were associated with increased selection by bull trout. In 2014, richness of infectious agents was also associated with greater predation risk. This is a rare demonstration of predator consumption resulting in selection for prey that carry infectious agents. The mechanism by which this selection occurs is not yet determined. By culling infectious agents from migrant populations, fish predators could provide an ecological benefit to prey.

**Key-words**

Predator-prey interactions, infectious hematopoietic virus, migratory culling, migration ecology, predation risk, Pacific salmon, pathogens, disease ecology

40

## 41 **Introduction**

42 Predators [1], infectious agents [2,3], and their interaction [4,5] play important roles in  
43 structuring communities and ecosystems. Both predators and infectious agents can apply strong  
44 selection pressures on prey and hosts, altering population-level phenotypes [4,6–8]. Infection can  
45 increase predation risk [9–11], presumably due to decreased ability to detect and/or evade  
46 predators, and/or increased conspicuousness to predators [12]. Infectious agents also affect  
47 animal migrants [13,14], migrations can act to reduce predation [15,16], and a few studies have  
48 found infection to increase predation risk of migrants (e.g. Mesa et al. [17]; Schreck et al. [18];  
49 and Hostetter et al. [19]).

50 Pacific salmon (*Oncorhynchus* spp.) are among the most studied animal migrants due to their  
51 ecological, economic, and cultural value. One of the migrations undertaken during the Pacific  
52 salmon life cycle is by juveniles, when smolts leave natal freshwater habitats and migrate  
53 downstream to the open ocean. Smolts can experience intense predation during downstream  
54 migration [20–22]. Recent research has linked smolt migration survival to the presence and/or  
55 prevalence of pathogens [23] and external signs of disease [19,24]. However, infection is merely  
56 the presence of a pathogen and does not necessarily indicate disease that could facilitate  
57 predation, but disease is difficult to assess in the field [25,26], especially when natural mortality  
58 is not observable [25].

59 Transcriptomics continue to be an increasingly valuable tool in linking animal responses to  
60 environmental conditions and other factors [27] and has proven to be a highly sensitive indicator  
61 in human disease diagnostics [28–31]. Recently, meta-analysis of multi-cohort microarray data  
62 based on six acute and chronic viral diseases revealed a panel of biomarkers consistently

1  
2  
3  
4  
5 63 associated with viral disease development in salmon [32]. Validation of the viral disease  
6  
7 64 development (VDD) biomarker panel using independent samples from infectious haematopoietic  
8  
9 65 necrosis virus (IHNV) challenge studies performed across multiple salmon species, and field  
10  
11 66 samples diagnosed pathologically with various viral and non-viral diseases showed that accurate  
12  
13  
14 67 classifications differentiating bacterial vs. viral diseases and latent infections vs. viral disease  
15  
16 68 could be realized with co-activation of as few as seven VDD biomarkers. Moreover, as  
17  
18 69 demonstrated in human diagnostic studies, the molecular panel could identify disease before  
19  
20  
21 70 clinical or morphological evidence can be observed [32,33], and due to the systemic nature of  
22  
23 71 viral infections, worked well across a range of tissues. The VDD technology has been  
24  
25 72 successfully applied to study disease development pathways for Piscine orthoreovirus (PRV) [33]  
26  
27  
28 73 and has led to the discovery of over a dozen novel viruses in salmon [34,35].  
29

30  
31 74 Among sockeye salmon (*Oncorhynchus nerka*) populations of the Fraser River watershed in  
32  
33 75 British Columbia, Canada, the population emigrating from Chilko Lake is among the largest and  
34  
35 76 most intensively studied. Each spring, 10 – 70 million juvenile sockeye salmon smolts leave the  
36  
37 77 lake and migrate downstream through a gauntlet of binge-feeding bull trout [36] and experience  
38  
39 78 high mortality in the clear, slow-moving waters of the Chilko River [37]. Combining acoustic  
40  
41  
42 79 telemetry with non-lethal biopsies and screening for infectious agents revealed a strong link  
43  
44 80 between mortality of migratory smolts and IHNV [23], but the mechanism of mortality was  
45  
46  
47 81 unable to be determined. IHNV is a coldwater virus found in North America, Europe, and Asia  
48  
49 82 [38]. IHNV appears most effective at infecting juvenile fish found in freshwater and at  
50  
51 83 temperatures between 10°C and 12°C [38]. In juvenile sockeye salmon, IHNV can be highly  
52  
53 84 pathogenic [39,40], inducing high rates of mortality. It is suggested that sockeye salmon are  
54  
55  
56  
57  
58  
59  
60

1  
2  
3  
4  
5 85 natural hosts of IHNv [40] and this virus has been present in Chilko Lake for at least several  
6  
7 86 decades [41].  
8  
9

10 87 We assess infection-based predation risk of migrant juvenile sockeye salmon (*Oncorhynchus*  
11  
12 88 *nerka*) smolts by piscivorous bull trout (*Salvelinus confluentus*) in Chilko Lake We tested smolt  
13  
14 89 tissue samples using TaqMan assays for 17 infectious agents suspected or known to cause  
15  
16  
17 90 disease in salmon [25], including IHNv. We use a subset of high-performing VDD biomarkers to  
18  
19 91 attempt to link predation and infection with genetic markers of active viral disease states [32].  
20  
21

22 92  
23

## 24 93 **Methods**

### 27 94 **Study area and field sampling**

28  
29 95 Sampling occurred at the Chilko Lake-River outlet in British Columbia, Canada, where sockeye  
30  
31  
32 96 salmon smolts emigrate downstream each spring and the federal fisheries agency (Fisheries and  
33  
34 97 Oceans Canada) installs a river-wide counting fence to estimate outmigrant abundance. To  
35  
36 98 compare infection status between predated and non-predated smolts, individuals were collected  
37  
38 99 from within bull trout stomachs, as well as at random from the emigrant population (details  
40  
41 100 below) between April 30, 2014 and May 15, 2014, and April 19, 2015 and May 5, 2015. Bull  
42  
43 101 trout were captured via dip net or hook and line either at (immediately upstream of) the counting  
44  
45 102 fence or in the 1.3-km stretch between the counting fence and lake outlet. Stomach contents from  
46  
47  
48 103 bull trout were collected via gastric lavage. When possible, freshly ingested smolts were  
49  
50 104 individually wrapped in foil and frozen in liquid nitrogen; when this was not possible, smolts  
51  
52 105 were frozen at -20°C for up to 72 hours before transferring to liquid nitrogen or a -80°C freezer  
53  
54  
55 106 for long-term storage; our assessments are not expected to be impacted by this short-term storage  
56  
57  
58  
59  
60

1  
2  
3  
4  
5 107 at -20°C. Non-predated smolts were collected via dipnet at the counting fence at night during the  
6  
7 108 outmigration and selected at random from a small plastic wash basin. Totals of 62 (32 predated,  
8  
9 109 30 not) and 39 (30 predated, 9 not) smolts collected in 2014 and 2015, respectively, were  
10  
11 110 selected for pathogen screening. Samples sizes of non-predated smolts in 2015 were low because  
12  
13  
14 111 the second year of the study was opportunistic with limited funding and the field season was  
15  
16 112 shortened by high flows in the Chilko River that affected other active research. We also wanted  
17  
18 113 to focus on infectious agents in predated fish, rather than broadly characterizing the pathogens  
19  
20  
21 114 found in wild sockeye salmon smolts. Every predated smolt was assigned a condition score as a  
22  
23 115 metric for degree of degradation or digestion such that we could assess the potential effects of  
24  
25 116 sample degradation on infectious agents and biomarker expression. Condition scores ranged  
26  
27  
28 117 between zero (no visible signs of digestion) and six (prey item unidentifiable) as in Furey et al.  
29  
30 118 [42]. To maximize the condition of smolts assessed, in 2014 only samples with condition scores  
31  
32 119 between zero and two were selected for molecular work. In 2015, only samples with scores  
33  
34  
35 120 between zero and 1.5 were selected.

### 36 37 121 **Laboratory sampling and analyses**

38  
39 122 In the lab, smolts were dissected to remove gill and liver tissues using aseptic technique. Tissue  
40  
41 123 samples were screened for the presence of 17 infectious agents (Table 1; Supplemental Materials  
42  
43 124 Table S1), using high-throughput quantitative real-time reverse transcriptase polymerase chain  
44  
45 125 reaction (ht-qRT-PCR). Infectious agents selected are among those known to infect salmonids  
46  
47  
48 126 worldwide. The biomarkers selected are all among those found to be capable of consistently  
49  
50  
51 127 identifying individuals experiencing viral disease [32]. In addition, 14 host genes found to be a  
52  
53 128 high-performing subset of genes capable of consistently distinguishing a fish in an active viral  
54  
55 129 disease state (i.e. VDD) [32] were assessed (Supplemental Materials Table S2). Individuals in a  
56  
57  
58  
59  
60



1  
2  
3  
4  
5 130 viral disease state demonstrate powerful co-activation of these viral disease development (VDD)  
6  
7 131 genes, which can be identified via strong separation along the first axis of multivariate analyses  
8  
9 132 including expression of groups of VDD genes [32]. One of these assays, HERC6, had low assay  
10  
11 133 efficiency and was excluded, leaving 13 host genes. Three liver samples from predated smolts  
12  
13  
14 134 were removed from analyses due to low reference gene expression.  
15  
16

### 17 135 **Molecular assessment of infectious agents and smolt gene expression**

18  
19 136 PCR was conducted on the Fluidigm BioMark™ HD nanofluidic platform (Fluidigm Corp.,  
20  
21 137 South San Francisco, USA). Gill and liver tissues were homogenized separately in TRI reagent  
22  
23 138 (Ambion Inc., Austin, TX) and 1-bromo-3-chloropropane was added to the homogenate. Total  
24  
25 139 RNA was extracted by methods previously described [25,43] using MagMAX™-96 for  
26  
27 140 Microarrays Total RNA Isolation Kits (Applied Biosystems, Foster City, CA, USA) with a  
28  
29 141 Biomek FXP automated liquid- handling instrument (Beckman Coulter, Indianapolis, IN, USA)  
30  
31 142 according to the manufacturer's instructions. The Biomek FXP was also used to automatically  
32  
33 143 normalize total RNA to 1.0 µg. cDNA was synthesized from normalized RNA using SuperScript  
34  
35 144 VILO MasterMix (Invitrogen, CA, USA) following manufacturer's instructions. The nanoliter  
36  
37 145 volume used for each qPCR reaction on the BioMark necessitates a pre-amplification step. Thus,  
38  
39 146 1.25 µL of cDNA from each sample was pre-amplified with primer pairs corresponding to all  
40  
41 147 assays in a 5-µL reaction volume using TaqMan Preamp Master Mix (Life Technologies) (see  
42  
43 148 Miller et al. [32]). Unincorporated primers were removed using ExoSAP-IT High-Throughput  
44  
45 149 PCR Product Clean Up (MJS BioLynx Inc., ON, CAN), and samples were diluted 1:5 in DNA  
46  
47 150 Suspension Buffer. The assay mix was prepared containing 9 µL primers and 2 µL probes for the  
48  
49 151 TaqMan assays.  
50  
51  
52  
53  
54  
55  
56  
57  
58  
59  
60

1  
2  
3  
4  
5 152 All assays were run in duplicate on the BioMark Dynamic Array. A serial dilution of artificial  
6  
7 153 positive constructs (APC clones) of all infectious agent assays was run as six samples. This serial  
8  
9 154 dilution allowed for the calculation of assay efficiency, and the copy numbers of the interest  
10  
11 155 targets. The APC clones contain an additional probe (VIC) that allows for the detection of  
12  
13  
14 156 potential contamination caused by these highly concentrated samples. For biomarkers, assay  
15  
16 157 efficiency was assessed using a 5-sample serial dilution of pooled, pre-amplified samples. The  
17  
18 158 serial dilution was created by diluting the pooled sample in DNA suspension buffer. Three  
19  
20  
21 159 reference gene assays (S100 calcium binding protein [COIL, Coiled-coil domain-containing  
22  
23 160 protein 84 [786d16.1P], and 39S ribosomal protein L40, mitochondrial precursor [MrpL40]),  
24  
25 161 were included to assess sample quality and normalize biomarker gene data. A 5  $\mu$ L sample mix  
26  
27 162 was prepared [2.5 uL of TaqMan Gene Expression Master Mix (Life Technologies), 0.25 uL of  
28  
29 163 20X GE Sample Loading Reagent (Fluidigm), 2.25 uL of pre-amplified cDNA], which was  
30  
31 164 added to each assay inlet of the array following manufacturer's recommendations. After loading  
32  
33 165 the assays and samples into the chip by an IFC controller HX (Fluidigm), PCR was performed  
34  
35 166 with the following conditions: 50°C for 2 min, 95°C for 10 min, followed by 40 cycles of 95°C  
36  
37 167 for 15 s and 60°C for 1 min.

38  
39  
40  
41  
42 168 Cycle threshold (Ct) was determined using the Biomark Real-Time PCR analysis software.  
43  
44 169 Reaction curves for each positive sample-assay combination were visually evaluated for  
45  
46 170 abnormal curve shapes, close correspondence between replicates, and presence of APC  
47  
48 171 contamination as indicated by VIC positives. Using R [44], efficiency was calculated for each  
49  
50 172 assay, results where only one duplicate was positive for a sample-assay combination were  
51  
52 173 removed, limit of detection thresholds (above which, samples were considered negative [32])  
53  
54  
55  
56  
57  
58  
59  
60

1  
2  
3  
4  
5 174 applied, VIC positive samples removed, and duplicates averaged. Ct scores for infectious agents  
6  
7 175 were converted to RNA copy number per well using the standard curve for each assay.  
8  
9

### 10 176 **Reference gene performance and sample degradation potential**

11  
12 177 For all samples, we assessed the performance of three reference genes (S100 calcium COIL,  
13  
14 178 786d16.1P, and MrpL40) that should be expressed at relatively similar levels among all samples.  
15  
16 179 We wanted to examine their performance due to the possibility of samples degrading while in a  
17  
18 180 bull trout's stomach (which would only affect predated samples). Samples were removed if  
19  
20 181 expression of any reference gene was 1.5-times the interquartile range below the first quartile of  
21  
22 182 gene- and tissue-specific values (e.g. an outlier). Only four samples, one liver sample collected in  
23  
24 183 2014 and three liver samples collected in 2015, met this criterion and were removed. To further  
25  
26 184 assess the potential effects of sampling in both predated and non-predated samples we visually  
27  
28 185 assessed the expression of the three reference genes between predated statuses for all year-tissue  
29  
30  
31 186 combinations.  
32  
33  
34  
35

### 36 187 **Data analyses**

37  
38 188 To determine if infectious agents were more prevalent (i.e. greater percent of samples that were  
39  
40 189 positive) in predated smolts than in smolts caught by dipnet, a Fisher's exact test was conducted  
41  
42 190 for each pathogen for each tissue and year, along with the calculation of the odds ratio for  
43  
44 191 infection in predated vs non-predated samples. We used a false-discovery-rate adjusted  $\alpha = 0.05$   
45  
46 192 to assess significance. For any infectious agent found to be more prevalent in predated samples,  
47  
48 193 we determined if fish size (fork length; FL) varied between infection-positive and infection-  
49  
50 194 negative fish using a t-test. When FL was not measured directly, it was estimated from total  
51  
52 195 length (TL) or post-orbital hypural (POH) measurements via regression (Furey, unpublished  
53  
54  
55  
56  
57  
58  
59  
60

1  
2  
3  
4  
5 196 [data](#)). To determine if predated smolts had a greater diversity of infectious agents within their  
6  
7 197 tissues, the Shannon diversity index per sample was calculated using the “diversity” function in  
8  
9 198 the vegan package [45] in R [44] and compared via a Mann-Whitney U test on ranks.  
10  
11  
12 199 [To further characterize the relationships among infection, fish length, tissue sampled, and](#)  
13  
14 200 [predation, generalized models \(GLM\) were used. Four global models were constructed, one for](#)  
15  
16 201 [each year-tissue combination due to the imbalance in sample sizes of predated and non-predated](#)  
17  
18 202 [fish between years and some infectious agents being present in one year and not the other \(see](#)  
19  
20 203 [Results\). Predation status was the response variable, with smolt FL and presence or absence of](#)  
21  
22 204 [infectious agents as explanatory variables. In 2015, 12 smolts did not have any lengths recorded,](#)  
23  
24 205 [and these fish were removed from GLM analyses. Two age classes emigrate from Chilko Lake,](#)  
25  
26 206 [British Columbia. Age-1 smolts constitute on average ~96% of the migrating population, while](#)  
27  
28 207 [age-2 are substantially larger but make up ~4% of the migration \[46\]. Of the 32 predated smolts](#)  
29  
30 208 [assessed in 2014, 8 of them were age-2 \(classified as those >116 mm FL; Brian Leaf, DFO, pers.](#)  
31  
32 209 [comm.\), all of which were predated. Thus, age-2 smolts were removed from 2014 GLM](#)  
33  
34 210 [analyses, as they were only present in the predated group \(and thus age and FL were](#)  
35  
36 211 [confounded\). Only infectious agents that were detected at least twice in a given tissue-year](#)  
37  
38 212 [combination were included. Infectious agents that were found among all samples were not](#)  
39  
40 213 [included. Global models were constructed in R \[44\]. Candidate models were ranked via AICc](#)  
41  
42 214 [using all-subsets regression via the MuMIn package \[47\] in R \[44\]. To prevent overfitting due to](#)  
43  
44 215 [our small sample sizes, the maximum number of parameters in each candidate model was limited](#)  
45  
46 216 [to three \(not including the intercept\). The model with the lowest AICc was considered further as](#)  
47  
48 217 [the most parsimonious and we present all models with  \$\Delta AICc < 3\$ .](#)  
49  
50  
51  
52  
53  
54  
55  
56  
57  
58  
59  
60

1  
2  
3  
4  
5 218 Cycle threshold (Ct) scores were transformed using a standard curve of known infectious agent  
6  
7 219 RNA concentrations to represent RNA copy number per PCR well. Principal components  
8  
9 220 analysis (PCA) was used to visualize variability in VDD gene expression among samples.  
10  
11 221 Separate PCAs were run for each year-tissue combination (four in total). PCA results were  
12  
13 222 assessed visually to determine relationships between VDD gene expression and both predation  
14  
15 223 and infection status, focusing on groupings of samples along the first two axes. All analyses were  
16  
17 224 completed in R 3.5.1 [44], with PCAs conducted with the ‘prcomp’ function.  
18  
19  
20  
21

## 22 225 **Results**

### 23 226 **Infectious agents**

24  
25  
26 227 Among the 17 infectious agents screened for, 10 (including IHNV) were found to be in sampled  
27  
28 228 smolts between the two years and tissues (Table 1). IHNV was only observed in 2014, but its  
29  
30 229 prevalence dramatically differed between predated (87.5% in gill and 35.5% in liver) and non-  
31  
32 230 predated (20% in gill and 3.3% in liver) samples. The odds of IHNV infection in gill was 25.8-  
33  
34 231 times greater for predated than non-predated smolts (Fisher exact test, fdr-corrected  $P < 0.0001$ )  
35  
36 232 and 15.3-times greater in liver (Fisher exact test, fdr-corrected  $P = 0.007$ ). IHNV prevalence did  
37  
38 233 not differ between age-1 and age-2 predated smolts (Supplementary Materials). T-tests  
39  
40 234 comparing mean fork length between fish positive and negative for IHNV in 2014 found no  
41  
42 235 significant difference in size in either gill ( $P = 0.75$ ) or liver tissues ( $P = 0.86$ ). No pathogen  
43  
44 236 aside from IHNV was found to be statistically more prevalent in predated samples than non-  
45  
46 237 predated. ‘*Candidatus Branchiomonas cysticola*’ was found in ~94% of all samples. Although  
47  
48 238 not significantly so, most observed infectious agents were observed at higher prevalence in  
49  
50 239 predated samples than not, with *Flavobacterium psychrophilum* being 1.4 – 3.9-times more  
51  
52  
53  
54  
55  
56  
57  
58  
59  
60

1  
2  
3  
4  
5 240 likely to be found in predated smolts among all tissue-year combinations. *Ichthyophthirius*  
6  
7 241 *multifiliis* was not found in any liver samples in 2014, (and only in two liver samples in 2015,  
8  
9 242 both predated), but in both years of gill samples, the agent was consistently found more often in  
10  
11 243 predated samples. No pathogen was found to be more prevalent in non-predated samples in more  
12  
13 244 than one tissue-year combination (Table 1); in the three instances where a pathogen was found  
14  
15 245 more often in non-predated samples, none were statistically significant (all *fdr*-corrected  $P >$   
16  
17 246 0.05). The Shannon diversity index of infectious agents was significantly greater in predated  
18  
19 247 samples for both gill (Mann-Whitney U test;  $P < 0.001$ ) and liver (Mann-Whitney U test;  $P =$   
20  
21 248 0.02) tissues in 2014 (Figure 1). In 2015 samples, the diversity index did not vary between  
22  
23 249 predated and non-predated samples in either tissue (Mann-Whitney U test;  $P > 0.05$ ).

24  
25  
26  
27  
28 250 Use of GLMs revealed similar, but also additional relationships between infection and predation  
29  
30 251 risk (Table 2) to the pathogen-by-pathogen approach. IHNv was retained in all 2014 models with  
31  
32 252  $\Delta AICc < 3$ , for both gill and liver, with increased predation risk associated with infection.  
33  
34 253 However, the top-ranked 2014-gill model also revealed a potential increased probability of  
35  
36 254 predation for smolts infected with *Ichthyophthirius multifiliis*. Similarly, both 2015 models  
37  
38 255 showed positive relationship between predation and presence of *Ichthyophthirius multifiliis*  
39  
40 256 (Table 2). Lastly, the top-ranked 2015-liver model also suggested that infection with *Candidatus*  
41  
42 257 *Branchiomonas cysticola* was associated with reduced chance of predation risk, as it was found  
43  
44 258 in 100% of predated samples, but only two-thirds of predated samples (Table 1; Table 2).

### 259 Fork length and age

50  
51  
52 260 Among GLMs, the 2014-liver models and all 2015 models suggested that smaller fish were at  
53  
54 261 greater risk of predation (negative FL coefficient; Table 2). This relationship was consistent  
55  
56  
57  
58  
59  
60

262 among year-tissue combinations, with all models  $\Delta AICc < 3$  containing FL, including the top  
263 models. In 2014 samples, mean FL of smolts did not differ between IHN+ and IHN- smolts, in  
264 both gill ( $t = 0.46$ ,  $df = 39$ ,  $P = 0.64$ ), and liver ( $t = -0.12$ ,  $df = 40$ ,  $P = 0.90$ ) tissues. Similarly, the  
265 prevalence of IHN (0.875) was the same between age-1 (21 of 24) and age-2 (7 of 8) predated  
266 smolts in 2014, and thus the inclusion of age-2 fish in our predated sample did not bias IHN  
267 prevalence in predated fish.

### 268 Gene expression

269 PCAs on 2014 VDD gene expression data (the year in which IHNv was present) revealed three  
270 smolts that exhibited strong separation along the first PC axis (most positive PC1; Figure 2). This  
271 strong separation was apparent in both gill and liver tissues (Figure 2), and these three same  
272 smolts had among the highest tissue-specific loads of IHNv (Figure 2). An additional fourth gill  
273 2014 sample exhibited the same strong separation on the first PC axis, but was not included in  
274 liver analyses due to poor reference gene performance. Aside from these individuals, PCA in  
275 both years also demonstrated further shifts in VDD gene expression between predated and non-  
276 predated smolts in at least one of the first two PC axes, regardless of year or tissue (Figure 2).  
277 There was some tissue- and year-specific variability; separation for 2015 gill samples was most  
278 clearly along PC1, while the other year-tissue combinations (aside from the three high-IHN-  
279 loaded individuals) demonstrated stronger shifts along PC2 (Figure 2).

### 281 Sample degradation potential

282 All three reference genes demonstrated higher expression (lower Ct scores) in non-predated  
283 samples in gills for both years (786d16.1P was significantly different in both years, COIL

1  
2  
3  
4  
5 284 significantly different in 2014, MrpL40 not significantly different in either year; t-test,  $\alpha = 0.05$ ;  
6  
7 285 Figure 3). Conversely, all three reference genes demonstrated lower expression (higher Ct  
8  
9 286 scores) in non-predated samples in livers in both years (COIL significantly so in both years,  
10  
11 287 MrpL40 in 2015, and 786d16.1P in neither; Figure 3).

12  
13  
14 288 There was no significant relationship between IHN loads and condition score for predated, IHN+  
15  
16 289 smolts for both gill (Pearson correlation = 0.31,  $df = 26$ ,  $t = 1.68$ ,  $P = 0.10$ ) and liver (Pearson  
17  
18 290 correlation coefficient = 0.22;  $df = 10$ ,  $t = 0.73$ ,  $P = 0.48$ ). However, IHN+ gill samples came  
19  
20 291 from predated smolts with a significantly higher condition score (i.e. more digested) than  
21  
22 292 predated smolts that were IHN- (mean score IHN+ = 1.4, mean score IHN- = 0.5, t-test,  $t = 2.60$ ,  
23  
24 293  $df=30$ ,  $P = 0.01$ ). However, condition scores did not differ between IHN+ and IHN- predated  
25  
26 294 smolt samples in liver samples (mean score IHN+ = 1.5, mean score IHN- = 1.1, t-test,  $t = 1.60$ ,  
27  
28 295  $df = 29$ ,  $P = 0.12$ ).

### 296 **Potential interactions between IHN infection and size.**

297 ~~To determine if IHN infection was confounded with fish size (as mortality in fish is often size-~~  
298 ~~selective; [46]), we compared fork length (FL) of IHN+ and IHN- smolts in 2014 samples. FL~~  
299 ~~was either measured directly, or estimated based on post-orbital hypural length or total length via~~  
300 ~~regression (Furey, unpublished data). Mean FL of smolts did not differ between IHN+ and IHN-~~  
301 ~~smolts, in both gill ( $t = 0.46$ ,  $df = 39$ ,  $P = 0.64$ ), and liver ( $t = -0.12$ ,  $df = 40$ ,  $P = 0.90$ ) tissues.~~

### 302 **Age differences**

303 ~~Two age classes emigrate from Chilko Lake, British Columbia. Age-1 smolts constitute~~  
304 ~~on average ~96% of the migrating population, while age-2 are substantially larger but make up~~  
305 ~~~4% of the migration [47]. Of the 32 predated smolts assessed in 2014, 8 of them were age-2~~



306 ~~(classified as those >116 mm FL; Brian Leaf, DFO, pers. comm.), all of which were predated.~~

307 ~~The prevalence of IHNV (0.875) was the same between age-1 (21 of 24) and age-2 (7 of 8)~~

308 ~~predated smolts in 2014, and thus the inclusion of age-2 fish in our predated sample did not bias~~

309 ~~IHNV prevalence in predated fish.~~

310

## 311 Discussion

312 IHNV-positive smolts in 2014 were 16-to-25-times more likely to be predated than not. It is  
313 uncommon for studies to make direct links between infection and predation risk outside of  
314 experimental settings (but see [9,11,[17](#),25,48,49]). Field studies on infection-based risk for fishes  
315 have focused on avian predators [18,25]. Miller *et al.* [25], used an approach similar to ours to  
316 demonstrate pathogen-based predation risk for wild salmon, with rhinoceros auklets (*Cerorhinca*  
317 *monocerata*) feeding more heavily on marine sockeye salmon smolts infected with *Parvicapsula*  
318 *spp.* parasites. Although not focused on predation, Jeffries *et al.* [23] found within our study  
319 system that most (>80%) IHNV-positive Chilko sockeye salmon smolts tracked with acoustic  
320 telemetry perished early in the migration, suggesting an association between IHNV infection and  
321 smolt mortality, and our results indicate that predation is the likely mechanism for at least a  
322 portion of this mortality.

323 IHNV is a single-stranded RNA virus that generates an acute, systemic disease that causes  
324 necrosis of hematopoietic tissues of the kidney and spleen, as well as damage to several other  
325 organs [50]. For juvenile sockeye, virulence is high [39] and can result in high mortality [40] 4 –  
326 20 days after exposure [51], but outbreaks are generally limited to cooler waters below 15°C  
327 [38]. IHNV's presence in Chilko Lake has been known for >40 years [41]. How infection of

1  
2  
3  
4  
5 328 IHNv results in increased predation by bull trout remains unclear. It is assumed that these  
6  
7 329 infectious agents either reduce a smolt's probability of escaping a predation attempt when  
8  
9 330 targeted [17], or increase the predator's propensity to target the smolt. Either possibility would  
10  
11 331 probably rely upon changing body coloration [52] or changing swimming behavior or  
12  
13 332 performance that can occur with infection [53,54]; IHN can result in lethargy, hyperactivity, or  
14  
15 333 erratic swimming [54]. Further work, such as experimental swim trials or high-resolution  
16  
17 334 tracking, is needed to determine the behavioral consequences of infection in migratory smolts,  
18  
19 335 and how this might result in increased predation risk. Such research would further develop our  
20  
21 336 understanding of how infections and movements, including migrations, interact to affect  
22  
23 337 individuals, populations, and communities [14,55].  
24  
25  
26  
27

28 338 Although IHNv demonstrated the strongest links between predation risk and infection,  
29  
30 339 Ichthyophthirius multifiliis -was also associated with increased predation risk via GLMs in three  
31  
32 340 of the four year-tissue combinations. Ichthyophthirius multifiliis was only found in predated  
33  
34 341 samples in both gill and liver tissues in 2015, and thus an odds ratio could not be calculated, but  
35  
36 342 in 2014 gill samples, this infectious agent was associated with a ~5-fold increase in predation  
37  
38 343 risk. This freshwater ciliate can induce mortality in fishes [56,57], including documented  
39  
40 344 epizootics in a wild population of spawning Fraser River sockeye salmon [58]. The parasite  
41  
42 345 targets epithelial tissue, and damage to gills leads to oxygen starvation and acidosis [57]. Thus,  
43  
44 346 Ichthyophthirius multifiliis can reduce swimming capacity of hosts [59]. In contrast to IHNv, the  
45  
46 347 likelihood of infection with this globally-distributed parasite increases with rising water  
47  
48 348 temperature (as a result of reduced generation time; [57,60]).  
49  
50  
51  
52  
53  
54  
55  
56  
57  
58  
59  
60

1  
2  
3  
4  
5 349 Lastly, one model (representing liver samples in 2015) suggested that infection of *Candidatus*  
6  
7 350 *Branchiomonas cysticola* resulted in reduced predation risk. But this infectious agent was quite  
8  
9 351 prevalent among all samples, with a prevalence rate between 90-100% except for predated liver  
10  
11 352 samples (67%), including 100% prevalence in predated and non-predated gill samples. Thus, our  
12  
13 353 results likely reflect an ubiquitous infectious agent in this population and caution  
14  
15 354 overinterpreting of the GLM result implying reduced predation risk. Multiple studies from our  
16  
17 355 research group have found high incidence of this pathogen with no accompanying physiological  
18  
19 356 or survival impact [61 – 63], including in this population of sockeye salmon smolts [64] and  
20  
21 357 research from Norway suggested that despite its 100% prevalence in Atlantic salmon gill  
22  
23 358 epitheliocysts, this bacteria was not associated with gill disease [65].  
24  
25  
26  
27  
28 359 The presence of an infectious agent, without an indication of tissue damage or an immunological  
29  
30 360 response (such as the VDD gene panel used in this study), is not evidence of infectious disease.  
31  
32 361 Therefore, unsurprisingly, most of the infectious agents detected in this study were not  
33  
34 362 associated with increased predation risk. Furthermore, the virulence of an infection is dependent  
35  
36 363 upon the interaction of aspects of the host, its environment, and the pathogen. Salmon  
37  
38 364 populations that have coevolved with endemic pathogens may be immunologically equipped to  
39  
40 365 resist physiological impairment [66] and some pathogens may disrupt homeostasis primarily in  
41  
42 366 the context of environmental stressors, a pertinent example being the importance of cool  
43  
44 367 temperatures for IHNV virulence [40].  
45  
46  
47  
48  
49 368 In addition to ~~IHNv~~ the prevalence of specific agents, the diversity of infectious agents detected  
50  
51 369 was higher in predated samples in both tissues in 2014. Similarly, rhinoceros auklets fed more  
52  
53 370 heavily on sockeye salmon smolts with higher pathogen richness [25]. Although the mechanism  
54  
55  
56  
57  
58  
59  
60

1  
2  
3  
4  
5 371 for a correlation between pathogen diversity and predation status is unclear, we hypothesize that  
6  
7 372 smolts with greater diversity of infectious agents are likely physiologically compromised.

8  
9 373 Although diversity metrics (or other metrics such as relative infection burden [63]) can describe  
10  
11 374 the variability in infections in terms of presence and load of multiple infections, infectious agents  
12  
13  
14 375 can interact in complex ways. In certain circumstances coinfection can exacerbate existing or  
15  
16 376 generate new physiological issues for the host [67,68] or even mediate impacts through  
17  
18 377 competitive or antagonistic interactions [69-71]. Thus, further work should focus not only  
19  
20  
21 378 specific infections or the number of unique infections, but also the combination of infections and  
22  
23 379 their loads.

24  
25  
26 380 Regardless of the mechanism, we provide evidence that infections can increase predation risk of  
27  
28 381 fish in the wild. Predation on juvenile salmonids has long been of interest, with research focused  
29  
30  
31 382 on quantifying the number of salmon lost via avian [72,73] predators and piscivorous fishes  
32  
33 383 [74,75] alike. However, it appears in this system that the impacts of predation by bull trout and  
34  
35 384 infection are not additive sources of mortality, but rather compensatory. There is increasing  
36  
37  
38 385 recognition that predators of salmon exert selective pressures [19,25,76], but it remains difficult  
39  
40 386 to quantify the interactions among various biological and environmental conditions influencing  
41  
42 387 mortality [25].

43  
44  
45 388 Our assessment of infectious agent influences on predation risk is dependent upon multiple  
46  
47 389 assumptions, including that once ingested, an infected smolt cannot infect others. IHNv-infected  
48  
49 390 smolts, however, were in worse condition (a proxy for longer duration in the gut) than those that  
50  
51  
52 391 were not infected (in gill samples, but not liver samples), which may be evidence of transmission  
53  
54 392 post-ingestion. If cross-contamination of IHNv within the gut does occur, it could be through the  
55  
56  
57  
58  
59  
60

1  
2  
3  
4  
5 393 gills, which were the only externally exposed tissue sampled. As IHNV can be present in mucus  
6  
7 394 [77], it is plausible that cross-contamination could occur (subsequently increasing the prevalence  
8  
9 395 of infectious agent-positive fish in the predated sample). Restricting sampling to only internal  
10  
11 396 organs in future studies could minimize this risk. With cessation of circulation post-mortem  
12  
13 397 within the fish, we feel it is highly unlikely that an infection could travel between gills and liver  
14  
15 398 once in the bull trout's stomach. Cross-contamination after ingestion would be more likely if  
16  
17 399 infectious agents could persist and proliferate after host death. Stomach acid, however, is a  
18  
19 400 hostile environment that is thought to have evolved in vertebrates not only to aid digestion, but to  
20  
21 401 protect against infectious agents [78,79], which would help to prevent productivity after  
22  
23 402 ingestion. It is also possible that we observed greater prevalence of IHNV in gills rather than  
24  
25 403 livers due to heavy infections in the gills represented a more developed infection where the virus  
26  
27 404 can be detected in all tissues, if the liver degrades more quickly postmortem. Examining multiple  
28  
29 405 tissues simultaneously may also assist in determining infection or disease progression.  
30  
31  
32  
33  
34  
35 406 Another assumption of our study is that IHNV is not transferred from bull trout to ingested  
36  
37 407 smolts. Although IHNV can infect a variety of North American salmonids [80], to our knowledge  
38  
39 408 it has never been documented in bull trout, albeit implicated in a historical population collapse in  
40  
41 409 Lake Chelan, Washington [81]. Susceptibility to IHNV is species- and experience-dependent,  
42  
43 410 with other chars exhibiting more resilience than sockeye salmon [80]. If bull trout exhibit similar  
44  
45 411 resilience, it seems likely that their infection rates and loads would be low relative to those  
46  
47 412 observed in sockeye salmon smolts. If bull trout are susceptible IHNV or any other screened  
48  
49 413 infectious agent, it is certainly feasible for these fish to become infected due to repeated  
50  
51 414 exposures via feeding on smolts during the outmigration. Ingestion of a virus can possibly result  
52  
53  
54  
55  
56  
57  
58  
59  
60

1  
2  
3  
4  
5 415 in infection transmission [82], leading to concerns over the use of wild baitfish in hatcheries or  
6  
7 416 moving baitfish into new systems [83]. It remains unknown, however, if the ingestion of a smolt  
8  
9 417 would provide an appropriate mechanism for infectious agent transfer from bull trout to smolts,  
10  
11 418 and thus further research could address the validity of this assumption. Regardless, our work  
12  
13 419 presents compelling evidence for the influence for fish health to impact predation risk.

14  
15  
16  
17 420 Lastly, IHNV infection does not appear to be confounded by smolt size or age. IHNV affects fish  
18  
19 421 quickly [40], and thus feeding might not be impacted for a long enough duration to generate size  
20  
21 422 differences among infected and uninfected smolts. Similarly, IHNV had equal prevalence in  
22  
23 423 predated samples between the two age classes of smolts emigrating the lake. Thus, IHNV  
24  
25 424 infection likely affects predation risk independent of size, which commonly correlates with  
26  
27  
28 425 survival in juvenile fishes [84].

29  
30  
31 426 Even though IHNV was not confounded by size, our analyses found evidence of size-based  
32  
33 427 selection, with bull trout consuming smaller fish, supporting earlier findings in this system [42].  
34  
35  
36 428 Increased size of fish can both reduce potential gape-limited predators and improve ability to  
37  
38 429 evade predators [84]. Bull trout are likely not affected by gape, and thus size-based predation  
39  
40 430 risk is likely due to increased swimming performance of larger smolts. Smaller sockeye salmon  
41  
42 431 smolts are also disproportionately fed upon by rhinoceros auklets in the marine environment  
43  
44 432 [76], and thus larger smolt sizes may continually be selected for throughout both freshwater and  
45  
46 433 marine portions of the outmigration. However, we acknowledge our sample size is small for  
47  
48 434 investigating size-based predation risk as this paper focuses more on the role of infection.  
49  
50  
51

52  
53 435 Gene expression of markers shown to be predictive of viral disease development [32] differed  
54  
55 436 between predated and not-predated smolts. In particular, three individuals with high IHNV loads in  
56  
57  
58  
59  
60

1  
2  
3  
4  
5 437 2014 separated clearly along the first PC axis in both tissues (and a fourth gill sample), a  
6  
7 438 signature observed in other IHNv-infected fish known to be in a viral disease state [32]. Thus,  
8  
9 439 these individuals, all predated, were likely experiencing consequences of disease, an anecdotal  
10  
11 440 but rare link between disease and predation. There was also some separation between other  
12  
13 441 predated and not-predated individuals via PCA (i.e. 2015 samples when IHNv was not present)  
14  
15 442 that could possibly be due to an undetected infectious agent. However, we hesitate to attribute  
16  
17 443 these differences to predation selection, as these differences were of smaller magnitude, and we  
18  
19 444 cannot discount the possibility that gene expression was affected by sample degradation as IHN+  
20  
21 445 smolts were in worse condition than those IHN- (see below)-. However, we are confident that the  
22  
23 446 strong response from the four fish with high IHNv loads is not due to degradation, as these  
24  
25 447 samples separate from non-predated from other predated samples in the opposite direction along  
26  
27 448 the first PC axis and to a much larger degree (we also observe strong separation when we  
28  
29 449 conduct a PCA on the predated samples only, providing further evidence of a biologically  
30  
31 450 relevant signal; Figure S1). Recent work assessing gene expression in gill biopsies on smolts  
32  
33 451 tracked with acoustic telemetry found high IHNv loads to be associated with VDD genes and the  
34  
35 452 first PC axis, but did not find IHNv presence to correlate with survival [64], unlike this study and  
36  
37 453 Jeffries et al. [23]. However, Stevenson et al. [64] tagged fewer fish with biopsies relative to  
38  
39 454 Jeffries et al. [23] and still found age-2 fish that perished in the first 14 km of migration to have  
40  
41 455 high PC1 scores that were associated with elevated IHNv loads [64]. Thus, more work is needed  
42  
43 456 to determine the dynamics of IHNv in the system and the interannual variability in its impacts on  
44  
45 457 smolts.  
46  
47  
48  
49  
50  
51  
52  
53  
54  
55  
56  
57  
58  
59  
60

1  
2  
3  
4  
5 458 Reference genes demonstrated that predated samples had lower expression than non-  
6  
7 459 predated samples in gills, but higher expression in liver, although most values were highly  
8  
9 460 overlapping. Although it is difficult to explain why one tissue would react differently than the  
10  
11 461 other regarding gene expression, the lower expression of predated gill samples could be the  
12  
13 462 result of sample degradation. The gills, being an external tissue, would be more exposed to the  
14  
15 463 bull trout's stomach acids and digestive processes than the liver tissue. Sample degradation, or  
16  
17 464 any factor that would result in a shift of gene expression between predated and non-predated  
18  
19 465 samples, would affect our ability to test for predation-based impacts. For example, we see  
20  
21 466 consistent shifts in gene expression based on predation status using PCA, but we cannot  
22  
23 467 demonstrate that these differences are not due to sample degradation alone. The separation  
24  
25 468 between predation statuses apparent via PCA could be attributed to differences in gene  
26  
27 469 performance in the assays or could reflect cellular post-mortem transcriptional shifts, which have  
28  
29 470 been documented to occur in zebrafish, mice, and humans [85,86]. However, we see much larger  
30  
31 471 separation in multivariate space regarding VDD gene expression in four samples with high IHNV  
32  
33 472 loads in 2014, that load within the PCA in an opposite direction from other predated samples.  
34  
35 473 We also still see strong separation of these same individuals along the first PC axis when  
36  
37 474 conducting a PCA on only predated fish, indicating unique gene expression regardless of  
38  
39 475 predation status (Figure S1). This panel has also been effectively applied to recently dead and  
40  
41 476 live sampled farmed salmon to differentiate fish in an active viral disease state, with findings  
42  
43 477 validated through pathology, providing evidence that these signatures are retained after death  
44  
45 478 [85]. Other recent work suggest that RNA can indeed remain intact post-mortem, although the  
46  
47 479 responses are gene-specific [86,87]. Therefore, we are confident these three or four samples are  
48  
49 480 indeed expressing the screened VDD genes in a distinct matter. If post-mortem sample  
50  
51  
52  
53  
54  
55  
56  
57  
58  
59  
60



1  
2  
3  
4  
5 481 degradation is a factor for at least some host genes, we do not expect infectious agents to be as  
6  
7 482 adversely affected, as microbes can survive passage through the gut of a predator, and therefore  
8  
9 483 can continually produce mRNA transcripts, maintaining our ability to detect their presence after  
10  
11 484 death of the host. In addition, tissue selection may also affect ability to detect and assess  
12  
13  
14 485 infection and needs to be considered when interpreting each infectious agent. For example, the  
15  
16 486 kidneys would be more ideal for further assessments of IHNv, given that this virus causes  
17  
18 487 disease within this tissue.

20  
21 488 In conclusion, we provide evidence that specific infections can be associated with higher  
22  
23 489 predation risks in wild fish, suggesting compensatory mortality. Predation may therefore aid  
24  
25 490 ‘migratory culling’ [13,14], where the physiological impacts of infection prevent successful  
26  
27 491 migration in some individuals, reducing pathogen prevalence, burdens, and transmission in the  
28  
29 492 population. Indeed, Mesa et al. [17] suggested that avian predation on smolts with BKD may  
30  
31 493 explain why high infectious loads of *Renibacterium salmoninarum* are relatively rare in the  
32  
33 494 Columbia River. The potential for migratory culling has important implications for management  
34  
35 495 such as predator control [88]. If fish are compromised upon migration, survival may be poor  
36  
37 496 regardless of predators. Thus, control of native predators may not have the intended effects on  
38  
39 497 prey [89] and it is important to attempt to identify selection processes predators place on prey  
40  
41 498 such as juvenile salmon (i.e. [12, 76]). The ability for predators to facilitate or affect migratory  
42  
43 499 culling is likely dependent upon the specific qualities of the predators, the migrants and their  
44  
45 500 movement behaviors, the infection(s), and experienced environmental conditions. For instance,  
46  
47 501 the ability of the pathogen to spread before predation, or potential for other forms of transmission  
48  
49 502 (prey to predator, or vertically during other life stages) are likely to affect potential for predation-  
50  
51 503 assisted migratory culling. More broadly, it appears imperative to include infectious agents  
52  
53  
54  
55  
56  
57  
58  
59  
60

1  
2  
3  
4  
5 504 within monitoring of important fish populations, particularly with the possibility for individual  
6  
7 505 host-infection relationships to interact with climate change and warming waters, with some  
8  
9 506 infections- potentially becoming less prevalent (such as IHNV, generally limited to colder waters  
10  
11  
12 507 [38]), and others more [90,91], such as *Ichthyophthirius multifiliis* [90].  
13

14 508

15  
16 509

## 17 18 510 **Ethics**

19  
20  
21 511 This research was approved by the University of British Columbia Animal Ethics Committee  
22  
23 512 (animal care permit: A11-0125) in accordance with the Canadian Council of Animal Care.  
24  
25

## 26 513 **Data Accessibility**

27  
28  
29 514 Data are available via Dryad ([92] DOI:10.5061/dryad.12jm63xw2).  
30  
31

## 32 515 **Author Contributions**

33  
34  
35 516 NBF, ALB, KMM, and SGH conceived and planned the work. NBF, ALB, SJH, AGL, and SMD  
36  
37 517 contributed to field sampling. ALB, SL, KMM led laboratory processing. NBF and ALB  
38  
39 518 conducted analyses. All authors wrote, edited, and gave final approval for submission of the  
40  
41 519 manuscript.  
42  
43

## 44 45 520 **Competing Interests**

46  
47 521 We have no competing interests.  
48  
49

## 50 522 **Funding**

51  
52  
53 523 Work was supported by the Pacific Salmon Foundation and the Salish Sea Marine  
54  
55 524 Survival Project (contribution #XX), Canada's Ocean Tracking Network, Genome British  
56  
57  
58  
59  
60

1  
2  
3  
4  
5 525 Columbia (Strategic Salmon Health Initiative), MITACS Accelerate program, NSERC  
6  
7 526 Discovery grant to Hinch, Canada Foundation for Innovation, and Fisheries Society of the  
8  
9 527 British Islands small grants program.  
10

11 528

## 14 529 **Acknowledgements**

16 530 We thank G William, C Middleton and V Minke-Martin for field assistance, A Tabata for  
17  
18 531 database assistance, the Tsilhqot'in National Government and Xenigwet'in First Nation for  
19  
20 532 field access, and Fisheries and Oceans Canada Stock Assessment. [Some data provided in Table](#)  
21  
22 533 [1 were provided by the Strategic Salmon Health Initiative \(SSHI\) funded by Genome British](#)  
23  
24 534 [Columbia, Pacific Salmon Foundation, and Fisheries and Oceans, Canada. We thank T Ming](#)  
25  
26 535 [and K Kaukinen for analysing SSHI samples, and D Patterson and field crews for collection of](#)  
27  
28 536 [SSHI samples.](#)  
29  
30  
31  
32

33 537

539 **References**

- 540 1. Carpenter SR, Kitchell JF. 1988 Consumer Control of Lake interactions among lake  
541 organisms. Large-scale experimental manipulations reveal complex interactions among  
542 lake organisms. *Bioscience* **38**, 764–769.
- 543 2. Kiesecker JM, Blaustein AR. 1999 Pathogen reverses competition between larval  
544 amphibians. *Ecology* **80**, 2442–2448. (doi:10.1890/0012-  
545 9658(1999)080[2442:PRCBLA]2.0.CO;2)
- 546 3. Tack AJM, Dicke M. 2013 Plant pathogens structure arthropod communities across  
547 multiple spatial and temporal scales. *Funct. Ecol.* **27**, 633–645. (doi:10.1111/1365-  
548 2435.12087)
- 549 4. Edeline E, Ari T Ben, Vøllestad LA, Winfield IJ, Fletcher JM, James J Ben, Stenseth NC.  
550 2008 Antagonistic selection from predators and pathogens alters food-web structure. *Proc.*  
551 *Natl. Acad. Sci. U.S.A.* **105**, 19792–19796. (doi:10.1073/pnas.0808011105)
- 552 5. Parris MJ, Beaudoin JG. 2004 Chytridiomycosis impacts predator-prey interactions in  
553 larval amphibian communities. *Oecologia* **140**: 626–632. (doi:10.1007/s00442-004-1631-  
554 2)
- 555 6. Agrawal AA. 2001 Phenotypic plasticity in the interactions and evolution of species.  
556 *Science* **294**, 321–326. (doi:10.1126/science.1060701)
- 557 7. Appleton RD, Palmer AR. 1988 Water-borne stimuli released by predatory crabs and  
558 damaged prey induce more predator-resistant shells in a marine gastropod. *Proc. Natl.*  
559 *Acad. Sci.* **85**, 4387–4391. (doi:10.1073/pnas.85.12.4387)
- 560 8. Arnott SA, Barber I, Huntingford FA. 2000 Parasite-associated growth enhancement in a  
561 fish-cestode system. *Proc. R. Soc. B Biol. Sci.* **267**, 657–663.  
562 (doi:10.1098/rspb.2000.1052)
- 563 9. Krumm CE, Conner MM, Hobbs NT, Hunter DO, Miller MW. 2010 Mountain lions prey  
564 selectively on prion-infected mule deer. *Biol. Lett.* **6**, 209–211.  
565 (doi:10.1098/rsbl.2009.0742)
- 566 10. Hudson PJ, Dobson AP, Newborn D. 1992 Do Parasites Make Prey Vulnerable To  
567 Predation - Red Grouse and Parasites. *J. Anim. Ecol.* **61**, 681–692.
- 568 11. Johnson PTJ, Stanton DE, Preu ER, Forshay KJ, Carpenter SR. 2006 Dining on disease:  
569 How interactions between infection and environment affect predation risk. *Ecology* **87**,  
570 1973–1980. (doi:10.1890/0012-9658(2006)87[1973:DODHIB]2.0.CO;2)
- 571 12. Mesa MG, Poe TP, Gadomski DM, Petersen JH. 1994 Are all prey created equal? A  
572 review and synthesis of differential predation on prey in substandard condition. *J. Fish*  
573 *Biol.* **45**, 81–96.
- 574 13. Bradley CA, Altizer S. 2005 Parasites hinder monarch butterfly flight: Implications for  
575 disease spread in migratory hosts. *Ecol. Lett.* **8**, 290–300. (doi:10.1111/j.1461-  
576 0248.2005.00722.x)
- 577 14. Altizer S, Bartel R, Han BA. 2011 Animal migration and infectious disease risk. *Science*  
578 **331**, 296–302. (doi:10.1126/science.1194694)
- 579 15. McKinnon L, Smith PA, Nol E, Martin JL, Doyle FI, Abraham KF, Gilchrist HG,  
580 Morrison RIG, Bêty J. 2010 Lower predation risk for migratory birds at high latitudes.  
581 *Science* **327**, 326–327. (doi:10.1126/science.1183010)
- 582 16. Skov C, Chapman BB, Baktoft H, Brodersen J, Brønmark C, Hansson LA, Hulthén K,

- 1  
2  
3  
4  
5 583 Nilsson PA. 2013 Migration confers survival benefits against avian predators for partially  
6 584 migratory freshwater fish. *Biol. Lett.* **9**, 20121178. (doi:10.1098/rsbl.2012.1178)
- 7 585 17. Mesa MG, Poe TP, Maule AG, Schreck CB. 1998 Vulnerability to predation and  
8 586 physiological stress responses in juvenile chinook salmon (*Oncorhynchus tshawytscha*)  
9 587 experimentally infected with *Renibacterium salmoninarum*. *Can. J. Fish. Aquat. Sci.* **55**,  
10 588 1599–1606. (doi:10.1139/f98-049)
- 11 589 18. Schreck CB, Stahl TP, Davis LE, Roby DD, Clemens BJ. 2006 Mortality Estimates of  
12 590 Juvenile Spring–Summer Chinook Salmon in the Lower Columbia River and Estuary,  
13 591 1992–1998: Evidence for Delayed Mortality? *Transactions of the American Fisheries*  
14 592 *Society* **135**, 457–475. (doi:10.1577/T05-184.1)
- 15 593 19. Hostetter, NJ, Evans AF, Roby DD, Collis K. 2012 Susceptibility of Juvenile Steelhead to  
16 594 Avian Predation: The Influence of Individual Fish Characteristics and River Conditions.  
17 595 *Transactions of the American Fisheries Society* **141**, 1586–99.  
18 596 (<https://doi.org/10.1080/00028487.2012.716011>)
- 19 597 20. Beamesderfer RCP, Ward DL, Nigro AA. 1996 Evaluation of the biological basis for a  
20 598 predator control program on northern squawfish (*Ptychocheilus oregonensis*) in the  
21 599 Columbia and Snake rivers. *Can J Fish Aquat Sci* **53**, 2898-2908.
- 22 600 21. Evans, AF, Hostetter NJ, Roby DD, Collis K, Lyons DE, Sandford BP, Ledgerwood RD,  
23 601 Sebring S. 2012 Systemwide Evaluation of Avian Predation on Juvenile Salmonids from  
24 602 the Columbia River Based on Recoveries of Passive Integrated Transponder Tags.  
25 603 *Transactions of the American Fisheries Society* **141**, 975–89.  
26 604 (<https://doi.org/10.1080/00028487.2012.676809>)
- 27 605 22. Osterback A-MK, Frechette DM, Shelton AO, Hayes SA, Bond MH, Shaffer SA, Moore  
28 606 JW. 2013 High predation on small populations: avian predation on imperiled salmonids.  
29 607 *Ecosphere* **4**, art116. (doi:10.1890/ES13-00100.1)
- 30 608 23. Jeffries KM *et al.* 2014 Immune response genes and pathogen presence predict migration  
31 609 survival in wild salmon smolts. *Mol. Ecol.* **23**, 5803–5815. (doi:10.1111/mec.12980)
- 32 610 24. Evans AF, Hostetter NJ, Collis K, Roby DD, Loge FJ. 2014 Relationship between  
33 611 Juvenile Fish Condition and Survival to Adulthood in Steelhead. *Transactions of the*  
34 612 *American Fisheries Society* **143**, 899–909. (doi:10.1080/00028487.2014.901248)
- 35 613 25. Miller KM *et al.* 2014 Infectious disease, shifting climates, and opportunistic predators:  
36 614 cumulative factors potentially impacting wild salmon declines. *Evol. Appl.* **7**, 812–55.  
37 615 (doi:10.1111/eva.12164)
- 38 616 26. Scott ME. 2010 The Impact of Infection and Disease on Animal Populations: Implications  
39 617 for Conservation Biology. *Conserv. Biol.* **2**, 40–56.
- 40 618 27. Cannon RE, Jeffries KM, Komoroske LM, Todgham AE, Fanguie NA. 2018. The utility of  
41 619 transcriptomics in fish conservation. *J. Exper. Biol.* **221**, jeb148833. doi:  
42 620 10.1242/jeb.148833
- 43 621 28. Andres-Terre M, McGuire HM, Pouliot Y, Bongen E, Sweeney TE, Tato CM, Khatri P.  
44 622 2015 Integrated, Multi-cohort Analysis Identifies Conserved Transcriptional Signatures  
45 623 across Multiple Respiratory Viruses. *Immunity* **43**, 1199–1211.  
46 624 (doi:10.1016/j.immuni.2015.11.003)
- 47 625 29. Lu C *et al.* 2011 Novel Biomarkers Distinguishing Active Tuberculosis from Latent  
48 626 Infection Identified by Gene Expression Profile of Peripheral Blood Mononuclear Cells.  
49 627 *PLOS ONE* **6**, e24290. (doi:10.1371/journal.pone.0024290)

- 1  
2  
3  
4  
5 628 30. Zaas AK et al. 2009 Gene Expression Signatures Diagnose Influenza and Other  
6 629 Symptomatic Respiratory Viral Infections in Humans. *Cell Host & Microbe* 6, 207–217.  
7 630 (doi:10.1016/j.chom.2009.07.006)  
8 631 31. Chen L, Borozan I, Feld J, Sun J, Tannis L-L, Coltescu C, Heathcote J, Edwards AM,  
9 632 McGilvray ID. 2005 Hepatic Gene Expression Discriminates Responders and  
10 633 Nonresponders in Treatment of Chronic Hepatitis C Viral Infection. *Gastroenterology*  
11 634 128, 1437–1444. (doi:10.1053/j.gastro.2005.01.059)  
12 635 32. Miller KM, Günther OP, Li S, Kaukinen KH, Ming TJ. 2017 Molecular indices of viral  
13 636 disease development in wild migrating salmon. *Conserv. Physiol.* 5.  
14 637 (doi:10.1093/conphys/cox036)  
15 638 33. Di Cicco E, Ferguson HW, Kaukinen KH, Schulze AD, Li S, Tabata A, Günther OP,  
16 639 Mordecai G, Suttle CA, Miller KM. 2018. The same strain of Piscine orthoreovirus (PRV-  
17 640 1) is involved in the development of different, but related, diseases in Atlantic and Pacific  
18 641 Salmon in British Columbia. *Facets* 3:599-641.  
19 642 34. Mordecai GJ et al. 2019 Endangered wild salmon infected by newly discovered viruses.  
20 643 *eLife* 8, e47615. (doi:10.7554/eLife.47615)  
21 644 35. Mordecai GJ et al. In press. Discovery and surveillance of viruses from salmon in British  
22 645 Columbia using viral immune-response biomarkers, metatranscriptomics and high-  
23 646 throughput RT-PCR. *Virus Evol* (doi:10.1093/ve/veaa069)  
24 647 36. Furey NB, Hinch SG, Mesa MG, Beauchamp DA. 2016 Piscivorous fish exhibit  
25 648 temperature-influenced binge feeding during an annual prey pulse. *J. Anim. Ecol.* 85,  
26 649 1307-1317. (doi:10.1111/1365-2656.12565)  
27 650 37. Clark TD et al. 2016 Tracking wild sockeye salmon smolts to the ocean reveals distinct  
28 651 regions of nocturnal movement and high mortality. *Ecol. Appl.* 26, 959-978.  
29 652 (doi:10.14286/2015CLARKTCHILKO)  
30 653 38. Dixon P, Paley R, Alegria-Moran R, Oidtmann B. 2016 Epidemiological characteristics of  
31 654 infectious hematopoietic necrosis virus (IHNV): a review. *Vet Res* 47, 63.  
32 655 (doi:10.1186/s13567-016-0341-1)  
33 656 39. Miller K, Traxler G, Kaukinen K, Li S, Richard J, Ginther N. 2007 Salmonid host  
34 657 response to infectious hematopoietic necrosis (IHN) virus: Cellular receptors, viral  
35 658 control, and novel pathways of defence. *Aquaculture* 272, 217–237.  
36 659 (doi:10.1016/j.aquaculture.2007.08.041)  
37 660 40. Lapatra S. 1998 Factors affecting pathogenicity of infectious hematopoietic necrosis virus  
38 661 (IHNV) for salmonid fish. *J. Aquat. Anim. Health* 10, 121–131. (doi:10.1577/1548-  
39 662 8667(1998)010<0121>  
40 663 41. Williams I V, Amend DF. 1976 A natural epizootic of infectious hematopoietic necrosis  
41 664 in fry of sockeye salmon (*Oncorhynchus nerka*) at Chilko Lake, British Columbia. *J. Fish.*  
42 665 *Res. Board Canada* 33, 1564–1567.  
43 666 42. Furey NB, Hinch SG, Lotto AG, Beauchamp DA. 2015 Extensive Feeding on Sockeye  
44 667 Salmon *Oncorhynchus Nerka* Smolts by Bull Trout *Salvelinus Confluentus* during Initial  
45 668 Outmigration into a Small, Unregulated and Inland British Columbia River. *Journal of*  
46 669 *Fish Biology* 86, 392–401. (<https://doi.org/10.1111/jfb.12567>)  
47 670 43. Miller KM, Li S, Kaukinen KH, Ginther N, Hammill E, Curtis JM, Patterson DA,  
48 671 Sierocinski T, Donnison L, Pavlidis P, Hinch SG. 2011. Genomic signatures predict  
49 672 migration and spawning failure in wild Canadian salmon. *Science* 331(6014):214-217.

- 1  
2  
3  
4  
5 673 44. R Core Team. 2018. R: A language and environment for statistical computing. R  
6 674 Foundation for Statistical Computing, Vienna, Austria. URL <https://www.R-project.org/>  
7 675 45. Oksanen J, Guillaume Blanchet F, Friendly M, Kindt R, Legendre P, McGlinn D, Minchin  
8 676 PR, O'Hara RB, Simpson, GL, Solymos, P, Stevens MHH, Szoecs E, Wagner H. 2019.  
9 677 vegan: Community Ecology Package. R package version 2.5-6. [https://CRAN.R-](https://CRAN.R-project.org/package=vegan)  
10 678 [project.org/package=vegan](https://CRAN.R-project.org/package=vegan)  
11 679 46. Irvine JR, Akenhead SA. 2013 Understanding Smolt Survival Trends in Sockeye Salmon.  
12 680 *Marine and Coastal Fisheries* **5**, 303–328. (doi:10.1080/19425120.2013.831002)  
13 681 47. Barton, K. 2019 MuMIn: Multi-Model Inference. R package version 1.43.6.  
14 682 <https://CRAN.R-project.org/package=MuMIn>  
15 683 48. Hudson PJ, Dobson AP, Newborn D. 1992 Do Parasites make Prey Vulnerable to  
16 684 Predation? Red Grouse and Parasites. *J. Anim. Ecol.* **61**, 681–692. (doi:10.2307/5623)  
17 685 49. Genovart M, Negre N, Tavecchia G, Bistuer A, Parpal L, Oro D. 2010 The Young, the  
18 686 Weak and the Sick: Evidence of Natural Selection by Predation. *PLOS ONE* **5**, e9774.  
19 687 (doi:10.1371/journal.pone.0009774)  
20 688 50. Bootland LM, Leong J-AC. 1999 Infectious haematopoietic necrosis virus. In *Fish*  
21 689 *Diseases and Disorders* (eds P Woo, J Leatherland, D Bruno), pp. 66–109.  
22 690 51. Kim CH, Dummer DM, Chiou PP, Leong JA. 1999 Truncated particles produced in fish  
23 691 surviving infectious hematopoietic necrosis virus infection: mediators of persistence? *J.*  
24 692 *Virol.* **73**, 843–9.  
25 693 52. LaPatra SE, Barone L, Jones GR, Zon LI. 2000 Effects of Infectious Hematopoietic  
26 694 Necrosis Virus and Infectious Pancreatic Necrosis Virus Infection on Hematopoietic  
27 695 Precursors of the Zebrafish. *Blood Cells, Molecules, and Diseases* **26**, 445–452.  
28 696 (doi:10.1006/bcmd.2000.0320)  
29 697 53. Munday BL, Kwang J, Moody N. 2002 Betanodavirus infections of teleost fish: a review.  
30 698 *J. Fish Dis.* **25**, 127–142.  
31 699 54. Tierney KB, Farrell AP. 2004 The relationships between fish health, metabolic rate,  
32 700 swimming performance and recovery in return-run sockeye salmon, *Oncorhynchus nerka*  
33 701 (Walbaum). *J. Fish Dis.* **27**, 663-671. (doi:10.1111/j.1365-2761.2004.00590.x)  
34 702 55. Binning SA, Shaw AK, Roche DG. 2017 Parasites and Host Performance: Incorporating  
35 703 Infection into Our Understanding of Animal Movement. *Integr Comp Biol* **57**, 267–280.  
36 704 (doi:10.1093/icb/icx024)  
37 705 56. Xu D-H, Klesius PH, Peatman E, Liu Z. 2011 Susceptibility of channel catfish, blue catfish  
38 706 and channel×blue catfish hybrid to *Ichthyophthirius multifiliis*. *Aquaculture* **311**, 25–30.  
39 707 (doi:10.1016/j.aquaculture.2010.10.012)  
40 708 57. Dickerson, HW. 2011. *Ichthyophthirius multifiliis*. In Woo, P. T., & Buchmann, K. (Eds.).  
41 709 (2011). *Fish parasites: pathobiology and protection*. CABI.  
42 710 58. Traxler GS, Richard J, McDonald TE. 1998 *Ichthyophthirius multifiliis* (Ich) Epizootics in  
43 711 Spawning Sockeye Salmon in British Columbia, Canada. *Journal of Aquatic Animal Health*  
44 712 **10**, 143–151. (doi:10.1577/1548-8667(1998)010<0143:IMIEIS>2.0.CO;2)  
45 713 59. Münderle M, Sures B, Taraschewski H. 2004 Influence of *Anguillicola crassus* (Nematoda)  
46 714 and *Ichthyophthirius multifiliis* (Ciliophora) on swimming activity of European eel *Anguilla*  
47 715 *anguilla*. *Diseases of Aquatic Organisms* **60**, 133–139. (doi:10.3354/dao060133)

- 1  
2  
3  
4  
5 716 [60. Maceda-Veiga A, Salvadó H, Vinyoles D, Sostoa AD. 2009 Outbreaks of \*Ichthyophthirius\*](#)  
6 717 [multifiliis in Redtail Barbs \*Barbus haasi\* in a Mediterranean Stream during Drought. \*Journal\*](#)  
7 718 [of Aquatic Animal Health](#) 21, 189–194. (doi:10.1577/H08-054.1)  
8 719 [61. Healy SJ, Hinch SG, Bass AL, Furey NB, Welch DW, Rechisky EL, Eliason EJ, Lotto AG,](#)  
9 720 [Miller KM. 2018 Transcriptome profiles relate to migration fate in hatchery steelhead](#)  
10 721 [\(\*Oncorhynchus mykiss\*\) smolts. \*Canadian Journal of Fisheries and Aquatic Sciences\*](#)  
11 722 [\(doi:10.1139/cjfas-2017-0424\)](#)  
12 723 [62. Teffer AK, Bass AL, Miller KM, Patterson DA, Juanes F, Hinch SG. 2018 Infections,](#)  
13 724 [fisheries capture, temperature, and host responses: multistressor influences on survival and](#)  
14 725 [behaviour of adult Chinook salmon. \*Canadian Journal of Fisheries and Aquatic Sciences\*](#)  
15 726 [\(doi:10.1139/cjfas-2017-0491\)](#)  
16 727 [5663. Bass, A.L., Hinch, S.G., Teffer, A.K., Patterson, D.A. and Miller, K.M., 2019. Fisheries](#)  
17 728 [capture and infectious agents are associated with travel rate and survival of Chinook](#)  
18 729 [salmon during spawning migration. \*Fish. Res.\* 209, 156-166.](#)  
19 730 [64. Stevenson CF, Bass AL, Furey NB, Miller KM, Li S, Rechisky EL, Porter AD, Welch](#)  
20 731 [DW, Hinch SG. 2019 Infectious agents and gene expression differ between sockeye](#)  
21 732 [salmon \(\*Oncorhynchus nerka\*\) smolt age classes but do not predict migration survival.](#)  
22 733 [\*Can. J. Fish. Aquat. Sci.\* \(doi: 10.1139/cjfas-2019-0113\)](#)  
23 734 [65. Gunnarsson GS, Karlsbakk E, Blindheim S, Plarre H, Imsland AK, Handeland S, Sveier H,](#)  
24 735 [Nylund A. 2017 Temporal changes in infections with some pathogens associated with gill](#)  
25 736 [disease in farmed Atlantic salmon \(\*Salmo salar\* L\). \*Aquaculture\* 468, 126–134.](#)  
26 737 [\(doi:10.1016/j.aquaculture.2016.10.011\)](#)  
27 738 [66. Bartholomew JL. 1998 Host Resistance to Infection by the Myxosporean Parasite](#)  
28 739 [\*Ceratomyxa shasta\*: A Review. \*Journal of Aquatic Animal Health\* 10, 112–120.](#)  
29 740 [\(doi:10.1577/1548-8667\(1998\)010<0112:HRTIBT>2.0.CO;2\)](#)  
30 741 [5767. Kotob MH, Menanteau-Ledouble S, Kumar G, Abdelzaher M, El-Matbouli M. 2016 The](#)  
31 742 [impact of co-infections on fish: a review. \*Vet. Res.\* 47, 1–12. \(doi:10.1186/s13567-016-](#)  
32 743 [0383-4\)](#)  
33 744 [5868. Bordes F, Morand S. 2011 The impact of multiple infections on wild animal hosts: a](#)  
34 745 [review. \*Infect. Ecol. Epidemiol.\* 1, 7346. \(doi:10.3402/iee.v1i0.7346\)](#)  
35 746 [5969. Lello J, Boag B, Fenton A, Stevenson IR, Hudson PJ. 2004 Competition and mutualism](#)  
36 747 [among the gut helminths of a mammalian host. \*Nature\* 428, 840–844.](#)  
37 748 [\(doi:10.1038/nature02490\)](#)  
38 749 [6070. Natsopoulou ME, McMahon DP, Doublet V, Bryden J, Paxton RJ. 2015 Interspecific](#)  
39 750 [competition in honeybee intracellular gut parasites is asymmetric and favours the spread](#)  
40 751 [of an emerging infectious disease. \*Proceedings of the Royal Society B: Biological\*](#)  
41 752 [\*Sciences\* 282, 20141896. \(doi:10.1098/rspb.2014.1896\)](#)  
42 753 [6471. Telfer S, Lambin X, Birtles R, Beldomenico P, Burthe S, Paterson S, Begon M. 2010](#)  
43 754 [Species Interactions in a Parasite Community Drive Infection Risk in a Wildlife](#)  
44 755 [Population. \*Science\* 330, 243–246. \(doi:10.1126/science.1190333\)](#)  
45 756 [6272. Evans AF et al. 2016 Avian Predation on Juvenile Salmonids: Spatial and Temporal](#)  
46 757 [Analysis Based on Acoustic and Passive Integrated Transponder Tags. \*Trans. Am. Fish.\*](#)  
47 758 [\*Soc.\* 145, 860–877. \(doi:10.1080/00028487.2016.1150881\)](#)  
48 759 [6373. Wood CC. 1987 Predation of Juvenile Pacific Salmon by the Common Merganser \(\*Mergus\*](#)  
49 760 [merganser\) on Eastern Vancouver Island. I: Predation during the Seaward Migration. \*Can.\*](#)



- 1  
2  
3  
4  
5 761 *J. Fish. Aquat. Sci.* (doi:10.1139/f87-112)
- 6 762 [6474](#). Kekäläinen J, Niva T, Huuskonen H. 2008 Pike predation on hatchery-reared Atlantic  
7 763 salmon smolts in a northern Baltic river. *Ecol. Fresh. Fish* 17, 100–109.  
8 764 (doi:10.1111/j.1600-0633.2007.00263.x)
- 9 765 [6575](#). Zimmerman MP, Ward DL. 1999 Index of Predation on Juvenile Salmonids by Northern  
10 766 Pikeminnow in the Lower Columbia River Basin, 1994–1996. *Trans Am. Fish. Soc.* 128,  
11 767 995–1007. (doi:10.1577/1548-8659(1999)128<0995:IOPOJS>2.0.CO;2)
- 12 768 [6676](#). Tucker, S., Mark Hipfner, J. and Trudel, M., 2016. Size-and condition-dependent  
13 769 predation: a seabird disproportionately targets substandard individual juvenile salmon. *Ecol.*  
14 770 97(2), 461-471.
- 15 771 [6777](#). LaPatra S, Rohovec J, Fryer J. 1989 Detection of Infectious Hematopoietic Necrosis  
16 772 Virus in fish mucus. *Fish Pathol.* 24, 197–202.
- 17 773 [6878](#). Koelz HR. 1992 Gastric acid in vertebrates. *Scand. J. Gastroenterol.* 27(S193): 2–6.  
18 774 doi:10.3109/00365529209095998.
- 19 775 [6979](#). Tennant SM, Hartland EL, Phumoonna T, Lyras D, Rood JI, Robins-Browne RM, Van  
20 776 Driel IR. 2008 Influence of gastric acid on susceptibility to infection with ingested bacterial  
21 777 pathogens. *Infect. Immun.* 76, 639–645. (doi:10.1128/IAI.01138-07)
- 22 778 [7280](#). Follett JE, Meyers TR, Burton TO, Geesin JL. 1997 Comparative susceptibilities of  
23 779 salmonid species in alaska to infectious hematopoietic necrosis virus (IHNV) and north  
24 780 American viral hemorrhagic septicemia virus (VHSV). *J. Aquat. Anim. Health* 9, 34–40.  
25 781 (doi:10.1577/1548-8667(1997)009<0034:CSOSSI>2.3.CO;2)
- 26 782 [7481](#). Nelson MC. 2012 What Happened to Bull Trout in Lake Chelan? An Examination of the  
27 783 Historical Evidence. US Fish and Wildlife Service, Leavenworth, WA, USA. 40 p.
- 28 784 [8273](#). Skall, HF, Olesen, NJ, Mellergaard S. 2005 Viral haemorrhagic septicaemia virus in  
29 785 marine fish and its implications for fish farming - A review. *J. Fish Dis.* 28(9): 509–529.  
30 786 doi:10.1111/j.1365-2761.2005.00654.x.
- 31 787 [7483](#). Goodwin AE, Peterson JE, Meyers TR, Money DJ. 2004 Transmission of Exotic Fish  
32 788 Viruses: The Relative Risks of Wild and Cultured Bait. *Fisheries* 29(5): 19–23.
- 33 789 [84](#). Sogard, S.M. 1997. [Size-selective mortality in the juvenile stage of teleost fishes: A review.](#)  
34 790 [Bull. Mar. Sci.](#) 60, 1129–1157.
- 35 791 [85](#). Di Cicco, E., Ferguson, H.W., Kaukinen, K.H., Schulze, A.D., Li, S., Tabata, A., Günther,  
36 792 O.P., Mordecai, G., Suttle, C.A., and Miller, K.M. 2018. [The same strain of Piscine](#)  
37 793 [orthoreovirus \(PRV-1\) is involved in the development of different, but related, diseases in](#)  
38 794 [Atlantic and Pacific Salmon in British Columbia.](#) *FACETS* 3(1): 599–641.  
39 795 [doi:10.1139/facets-2018-0008.](#)
- 40 796 [7686](#). Pozhitkov AE, Neme R, Domazet-Lošo T, Leroux BG, Soni S, Tautz D, Noble PA. 2017  
41 797 Tracing the dynamics of gene transcripts after organismal death. *Open Biol* 7, 160267.
- 42 798 [7787](#). Ferreira PG, Muñoz-Aguirre M, Reverter F, Godinho CPS, Sousa A, Amadoz A, Sodaei R,  
43 799 Hidalgo MR, Pervouchine D, Carbonell-Caballero J, Nurtdinov R. 2018 The effects of  
44 800 death and post-mortem cold ischemia on human tissue transcriptomes. *Nat. Comm.* 9, 490.
- 45 801 [7888](#). Lennox, R.J., Gallagher, A.J., Ritchie, E.G. and Cooke, S.J., 2018. Evaluating the  
46 802 efficacy of predator removal in a conflict-prone world. *Biol Cons.* 224, 277-289.
- 47 803 [7989](#). Packer C, Holt RD, Hudson PJ, Lafferty KD, Dobson AP. 2003 Keeping the herds healthy  
48 804 and alert: Implications of predator control for infectious disease. *Ecol. Lett.* 6, 797–802.  
49 805 (doi:10.1046/j.1461-0248.2003.00500.x)

- 1  
2  
3  
4  
5 ~~806~~ [8090](#). Karvonen A, Rintamäki P, Jokela J, Valtonen ET. 2010 Increasing water temperature and  
6 807 disease risks in aquatic systems: Climate change increases the risk of some, but not all,  
7 808 diseases. *International Journal for Parasitology* **40**, 1483–1488.  
8 809 (doi:10.1016/j.ijpara.2010.04.015)  
9 ~~810~~ [8191](#). Marcos-López M, Gale P, Oidtmann BC, Peeler EJ. 2010 Assessing the Impact of  
10 811 Climate Change on Disease Emergence in Freshwater Fish in the United Kingdom.  
11 812 *Transboundary and Emerging Diseases* **57**, 293–304. (doi:10.1111/j.1865-  
12 813 1682.2010.01150.x)  
13 814 [8292](#). Furey NB, Bass AL, Miller KM, Li S, Lotto AG, Healy SJ, Drenner SM, Hinch SG. 2020  
14 815 Electronic Supplementary Materials for: "Infected juvenile salmon can experience increased  
15 816 predation during freshwater migration". Dryad doi:10.5061/dryad.12jm63xw2)  
16 817  
17  
18  
19  
20  
21  
22  
23  
24  
25  
26  
27  
28  
29  
30  
31  
32  
33  
34  
35  
36  
37  
38  
39  
40  
41  
42  
43  
44  
45  
46  
47  
48  
49  
50  
51  
52  
53  
54  
55  
56  
57  
58  
59  
60

## Tables

**Table 1:** List of infectious agents assessed in sockeye salmon smolts using qRT-PCR, the percentage of positives recorded across year-tissue combinations ( $\pm$ SE), and the odds-ratio of each infectious agent being found in a predated smolt over a non-predated smolt are given. Odds ratios in bold and noted with an asterisk(\*) indicate significant Fisher exact test (fdr-corrected  $P < 0.05$ ). Sample sizes are as follows for each year-tissue combination: 2014 predated (n = 32 for gills, n = 31 for livers); 2014 not predated (n = 30 each tissue); 2015 predated (n = 30 each tissue); 2015 not predated (n = 9 each tissue). [For p](#)Prevalence rates [assessed from mixed-tissue samples in other studies](#) of Chilko sockeye salmon smolts [collected via the Strategic Salmon Health Initiative \(SSHI\)](#) are given for [2012 \(n = 54 – 56 smolts for each assay\), 2013 \(n = 85 – 89\), and 2014 \(n = 21 – 30\) for comparison, only infectious agents that had at least one positive in a smolt are included.](#)

| Infectious agent                                    | Assay name | Agent                | Percent positives (predated / not predated) |                                  |                     |                                  | odds-ratio (predated over not predated) |                       |                      |                       | Prevalence (SSHI samples) |                     |                      |
|-----------------------------------------------------|------------|----------------------|---------------------------------------------|----------------------------------|---------------------|----------------------------------|-----------------------------------------|-----------------------|----------------------|-----------------------|---------------------------|---------------------|----------------------|
|                                                     |            |                      | 2014 gill positives                         | 2014 liver positives             | 2015 gill positives | 2015 liver positives             | 2014 gill odds-ratio                    | 2014 liver odds-ratio | 2015 gill odds-ratio | 2015 liver odds-ratio | 2012                      | 2013                | 2014                 |
| <i>Candidatus</i><br><i>Branchiomonas cysticola</i> | c_b_cys    | Bacteria             | 100( $\pm$ 0.0)                             | <b>96.8(<math>\pm</math>3.2)</b> | 100( $\pm$ 0.0)     | <b>66.7(<math>\pm</math>9.1)</b> |                                         | 2.1                   |                      | 0.0                   | <a href="#">98.2</a>      | <a href="#">100</a> | <a href="#">100</a>  |
| <i>Ceratomyxa shasta</i>                            | ce_sha     | Myxozoan             |                                             |                                  |                     |                                  |                                         |                       |                      |                       | <a href="#">0.0</a>       | <a href="#">0.0</a> | <a href="#">0.0</a>  |
| <i>Dermocystidium salmonis</i>                      | de_sal     | Fungus/<br>Protozoan |                                             |                                  |                     |                                  |                                         |                       |                      |                       | <a href="#">1.8</a>       | <a href="#">0.0</a> | <a href="#">0.0</a>  |
| <i>Flavobacterium psychrophilum</i>                 | fl_psy     | Bacteria             | 87.5( $\pm$ 5.8)                            | 16.1( $\pm$ 6.6)                 | 76.7( $\pm$ 7.7)    | 14.8( $\pm$ 6.8)                 | 2.9                                     | 1.7                   | 3.9                  | 1.4                   | <a href="#">5.4</a>       | <a href="#">6.7</a> | <a href="#">17.2</a> |

1  
2  
3  
4  
5  
6  
7  
8  
9  
10  
11  
12  
13  
14  
15  
16  
17  
18  
19  
20  
21  
22  
23  
24  
25  
26  
27  
28  
29  
30  
31  
32  
33  
34  
35  
36  
37  
38  
39  
40  
41  
42  
43  
44  
45  
46  
47

) 5.0) 4)

|                                         |             |                |                                |                                |                                |                               |              |              |     |  |             |             |             |
|-----------------------------------------|-------------|----------------|--------------------------------|--------------------------------|--------------------------------|-------------------------------|--------------|--------------|-----|--|-------------|-------------|-------------|
| <i>Candidatus</i>                       | sch         | Bacteria       |                                |                                |                                |                               |              |              |     |  | <u>0.0</u>  | <u>0.0</u>  | <u>0.0</u>  |
| Syngnamydia salmonis                    |             |                |                                |                                |                                |                               |              |              |     |  |             |             |             |
| <i>Ichthyophthirius multifiliis</i>     | ic_mul      | Ciliate        | 28.1(±7.9)<br>)/6.7(±4.6)<br>) |                                | 16.7(±6.8)<br>)/0.0(±0.0)<br>) | 7.4(±5.0)/<br>0.0(±0.0)       | 5.3          |              |     |  | <u>3.6</u>  | <u>20.0</u> | <u>23.1</u> |
| Infectious hematopoietic necrosis virus | ihn_v       | Virus          | 87.5(±5.8)<br>)/20(±7.3)<br>)  | 35.5(±8.6)<br>/3.3(±4.0)<br>)  |                                |                               | <b>25.8*</b> | <b>15.3*</b> |     |  | <u>0.0</u>  | <u>0.0</u>  | <u>3.3</u>  |
| <i>Loma salmonae (Loma Spp)</i>         | lo_sal      | Microsporidium |                                |                                |                                |                               |              |              |     |  | <u>0.0</u>  | <u>0.0</u>  | <u>0.0</u>  |
| Pacific salmon parvovirus               | pspv        | Virus          | 9.4(±5.2)/<br>0.0(±0.0)        | 80.6(±7.1)<br>/66.7(±9.2)<br>) | 10(±5.5)/<br>11.1(±5.9)<br>)   | 48.1(±9.6)<br>)/22.2(10.4±)   | 2.1          | 0.9          | 3.2 |  | <u>78.6</u> | <u>96.6</u> | <u>93.3</u> |
| <i>Paranucleospora theridion</i>        | pa_ther     | Microsporidium |                                |                                |                                |                               |              |              |     |  | <u>0.0</u>  | <u>1.1</u>  | <u>0.0</u>  |
| <i>Parvicapsula minibicornis</i>        | pa_min      | Myxozoan       |                                |                                |                                | 0.0(±0.0)/<br>11.1(±5.9)<br>) |              |              |     |  | <u>0.0</u>  | <u>1.1</u>  | <u>0.0</u>  |
| <i>Parvicapsula pseudobranchicola</i>   | pa_pse      | Myxozoan       |                                |                                |                                |                               |              |              |     |  | <u>0.0</u>  | <u>0.0</u>  | <u>0.0</u>  |
| <i>Piscichlamydia salmonis</i>          | pch_sal     | Bacteria       | 15.6(±6.4)<br>)/0.0(±0.0)<br>) | 3.2(±3.2)/<br>0.0(±0.0)        |                                |                               |              |              |     |  | <u>0.0</u>  | <u>0.0</u>  | <u>0.0</u>  |
| Piscine reovirus                        | prv         | Virus          |                                |                                |                                |                               |              |              |     |  | <u>0.0</u>  | <u>0.0</u>  | <u>0.0</u>  |
| <i>Tetracapsuloides bryosalmonae</i>    | te_bry      | Myxozoan       |                                | 6.5(±4.4)/<br>0.0(±0.0)        |                                |                               |              |              |     |  | <u>0.0</u>  | <u>3.4</u>  | <u>16.7</u> |
| Rickettsia-like organism                | rlo         |                | 3.1(±3.1)/<br>0.0(±0.0)        |                                |                                |                               |              |              |     |  | <u>0.0</u>  | <u>1.1</u>  | <u>0.0</u>  |
| <i>Yersinia ruckeri</i>                 | ye_ruc_glnA | Bacteria       | 9.4(±5.2)/<br>0.0(±0.0)        |                                | 13.3(±6.2)<br>)/0.0(±0.0)<br>) |                               |              |              |     |  | <u>0.0</u>  | <u>0.0</u>  | <u>0.0</u>  |

818 **Table 2:** Summary of generalized linear models (GLMs) describing relationships  
 819 between predation status (binomial) and the presence of infectious agents and fork length  
 820 (FL). Candidate models are ranked by AICc, and only models with  $\Delta AICc < 3$  are shown.  
 821 The top-ranked model is in bold. First numeric value given for each model is the  
 822 intercept, and coefficients are shown for each explanatory variable. Infectious agents are  
 823 labelled as per their assay name (Table 1). Positive coefficients indicate increased  
 824 probability of predation (negative coefficients associated with reduced predation risk).

| 2014 - Gill                                                                         |             |               |  |
|-------------------------------------------------------------------------------------|-------------|---------------|--|
| Model                                                                               | AICc        | $\Delta AICc$ |  |
| <b><math>\sim -2.54 + \text{ihnv}(+3.64) + \text{ic\_mul}(+2.20)</math></b>         | <b>46.6</b> | <b>0</b>      |  |
| $\sim -1.75 + \text{ihnv}(+4.53) + \text{ic\_mul}(+2.44) + \text{fl\_psy}(-1.70)$   | 47.4        | 0.8           |  |
| $\sim -2.54 + \text{ihnv}(+3.49) + \text{ic\_mul}(+2.20) + \text{pch\_sal}(+16.14)$ | 47.7        | 1.04          |  |
| $\sim -2.56 + \text{ihnv}(+3.51) + \text{ic\_mul}(+2.25) + \text{pspv}(+16.61)$     | 47.7        | 1.12          |  |
| $\sim -2.08 + \text{ihnv}(+3.52)$                                                   | 48.5        | 1.91          |  |
| $\sim +1.63 + \text{FL}(-0.04) + \text{ihnv}(+3.60) + \text{ic\_mul}(+2.07)$        | 48.6        | 1.95          |  |
| $\sim -2.08 + \text{ihnv}(+3.36) + \text{pch\_sal}(+16.29)$                         | 49.4        | 2.79          |  |
| $\sim -1.39 + \text{ihnv}(+4.21) + \text{fl\_psy}(-1.39)$                           | 49.6        | 2.94          |  |

| 2014 - Liver                                                                  |             |               |  |
|-------------------------------------------------------------------------------|-------------|---------------|--|
| Model                                                                         | AICc        | $\Delta AICc$ |  |
| <b><math>\sim +12.29 + \text{FL}(-0.14) + \text{ihnv}(+3.56)</math></b>       | <b>61.1</b> | <b>0</b>      |  |
| $\sim -4.12 + \text{FL}(-0.14) + \text{ihnv}(+3.50) + \text{cb\_cys}(+16.64)$ | 62          | 0.91          |  |
| $\sim +12.22 + \text{FL}(-0.14) + \text{ihnv}(+3.55) + \text{pspv}(+0.16)$    | 63.3        | 2.29          |  |
| $\sim +12.31 + \text{FL}(-0.14) + \text{ihnv}(+3.57) + \text{fl\_psy}(-0.15)$ | 63.4        | 2.32          |  |

| 2015 - Gill                                                                             |           |               |  |
|-----------------------------------------------------------------------------------------|-----------|---------------|--|
| Model                                                                                   | AICc      | $\Delta AICc$ |  |
| <b><math>\sim +22.21 + \text{FL}(-0.27) + \text{ic\_mul}(+18.63)</math></b>             | <b>31</b> | <b>0</b>      |  |
| $\sim +22.56 + \text{FL}(-0.29) + \text{ic\_mul}(+17.77) + \text{fl\_psy}(+1.66)$       | 31.2      | 0.19          |  |
| $\sim +23.11 + \text{FL}(-0.29) + \text{ic\_mul}(+19.91) + \text{ye\_ruc\_glA}(+18.88)$ | 31.3      | 0.35          |  |
| $\sim +22.35 + \text{FL}(-0.28) + \text{fl\_psy}(+2.38)$                                | 31.4      | 0.39          |  |
| $\sim +22.10 + \text{FL}(-0.27) + \text{fl\_psy}(+2.25) + \text{ye\_ruc\_glA}(+16.74)$  | 33        | 2.08          |  |
| $\sim +24.52 + \text{FL}(-0.31) + \text{fl\_psy}(+2.66) + \text{pspv}(-1.10)$           | 33.4      | 2.47          |  |
| $\sim +22.36 + \text{FL}(-0.28) + \text{ic\_mul}(18.71) + \text{pspv}(+0.43)$           | 33.5      | 2.5           |  |

2015 - Liver

1  
2  
3  
4  
5  
6  
7  
8  
9  
10  
11  
12  
13  
14  
15  
16  
17  
18  
19  
20  
21  
22  
23  
24  
25  
26  
27  
28  
29  
30  
31  
32  
33  
34  
35  
36  
37  
38  
39  
40  
41  
42  
43  
44  
45  
46  
47  
48  
49  
50  
51  
52  
53  
54  
55  
56  
57  
58  
59  
60

825

| <u>Model</u>                                                                                  | <u>AICc</u> | <u><math>\Delta</math>AICc</u> |
|-----------------------------------------------------------------------------------------------|-------------|--------------------------------|
| <u><math>\sim +39.19 + FL(-0.25) + \text{cb\_cys}(-19.14) + \text{ic\_mul}(+20.09)</math></u> | <u>29.3</u> | <u>0</u>                       |
| <u><math>\sim +35.77 + FL(-0.21) + \text{cb\_cys}(-18.84)</math></u>                          | <u>29.8</u> | <u>0.57</u>                    |
| <u><math>\sim +36.07 + FL(-0.22) + \text{cb\_cys}(-18.61) + \text{pspv}(+1.35)</math></u>     | <u>31.1</u> | <u>1.78</u>                    |

1  
2  
3  
4  
5 827 Figure Legends  
6

7 828  
8

9 829 **Figure 1** Shannon diversity index of infectious agents found in gill and liver tissue of  
10  
11 sockeye salmon smolts between those predated and not predated by bull trout. Asterisks  
12 830  
13 indicate a significant difference in median pathogen richness between predated and non-  
14 831  
15 predated groups (Mann Whitney U-test,  $\alpha = 0.05$ ).  
16 832  
17

18 833  
19

20  
21 834 **Figure 2** PCA of gene expression of 13 genes used in diagnosing viral disease  
22  
23 835 development [40] in sockeye salmon smolt samples from 2014 and 2015 and in gill and  
24  
25 836 liver tissues. Circle size symbolizes IHNV loads (represented as the log of the estimated  
26  
27 837 copy number + 1). Red ellipses enclose the same samples (three in liver samples, with an  
28  
29 838 additional fourth in gill samples) that separate via the first PC axis and have high IHNV  
30  
31 839 loads (IHNV+), potentially indicative of an active disease state. Percentages in  
32  
33 840 parentheses indicate the percent variability explained among gene expression by that  
34  
35 841 specific axis.  
36  
37 842  
38

39 842  
40

41 843 **Figure 3:** Expression levels (via cycle threshold [Ct] values) of three reference genes  
42  
43 844 between years and tissues of juvenile sockeye salmon smolts. “Predated” indicates  
44  
45 845 predated samples, “Not” indicates control, or non-predated, sample. Asterisk (\*) indicates  
46  
47 846 significant difference in Ct score between predated and non-predated samples for a given  
48  
49 847 reference gene (t-test,  $\alpha = 0.05$ ).  
50  
51 848  
52

53 848  
54

55 849  
56  
57  
58  
59  
60

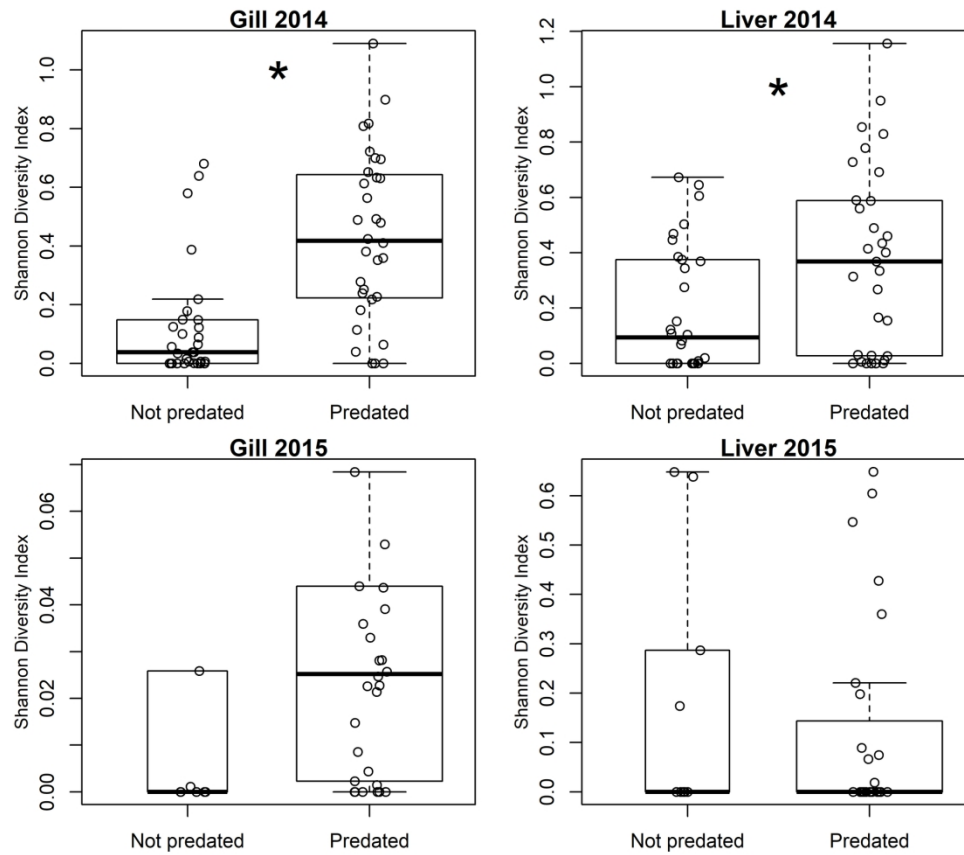

Figure 1 Shannon diversity index of infectious agents found in gill and liver tissue of sockeye salmon smolts between those predated and not predated by bull trout. Asterisks indicate a significant difference in median pathogen richness between predated and non-predated groups (Mann-Whitney U-test,  $\alpha = 0.05$ ).

177x152mm (300 x 300 DPI)



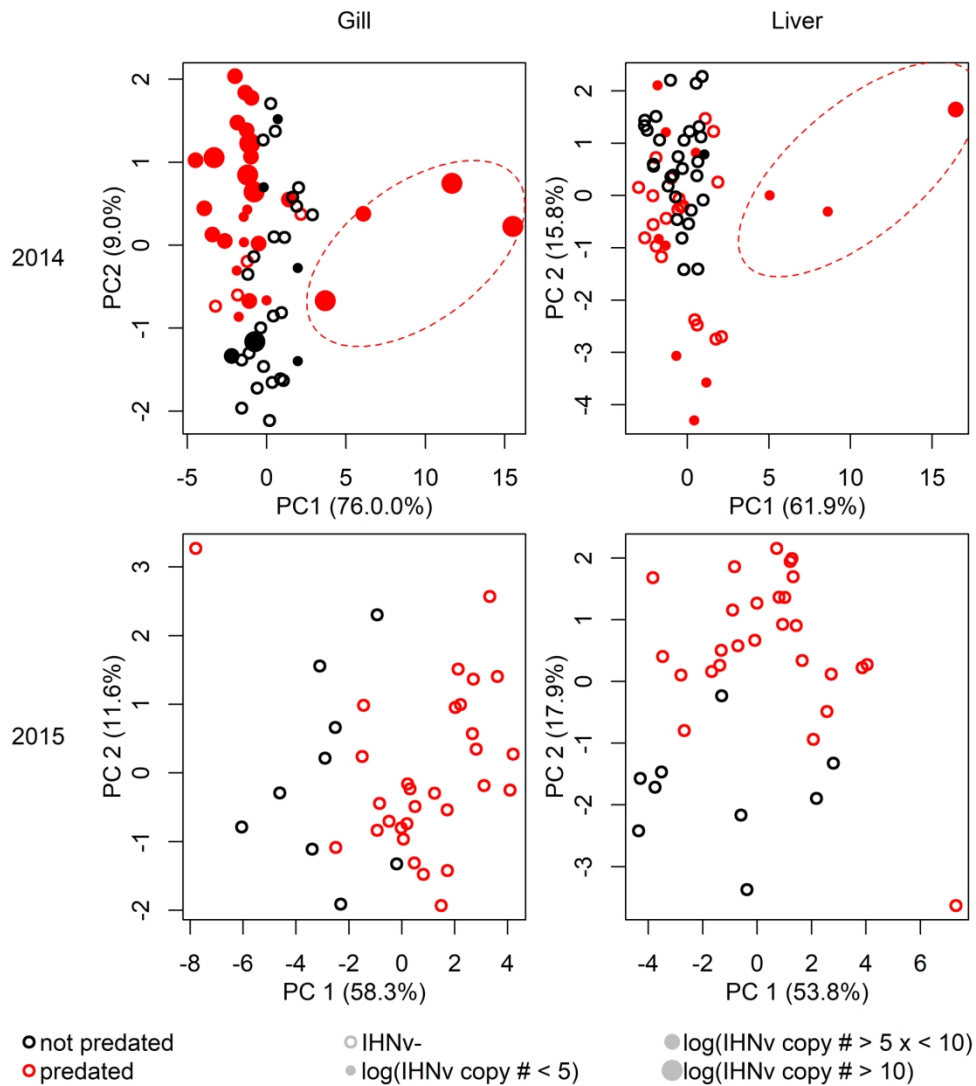

Figure 2 PCA of gene expression of 13 genes used in diagnosing viral disease development [40] in sockeye salmon smolt samples from 2014 and 2015 and in gill and liver tissues. Circle size symbolizes IHNv loads (represented as the log of the estimated copy number + 1). Red ellipses enclose the same samples (three in liver samples, with an additional fourth in gill samples) that separate via the first PC axis and have high IHNv loads (IHNv+), potentially indicative of an active disease state. Percentages in parentheses indicate the percent variability explained among gene expression by that specific axis.

177x203mm (300 x 300 DPI)

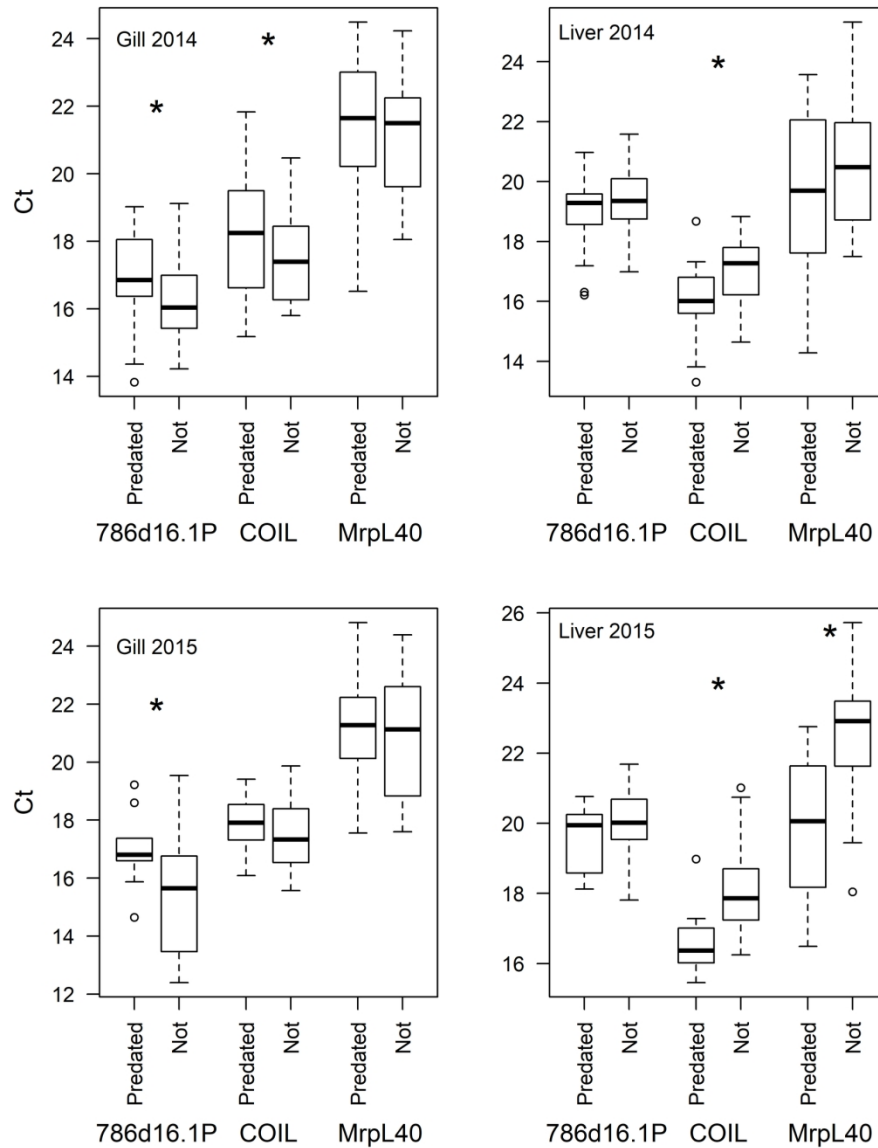

Figure 3: Expression levels (via cycle threshold [Ct] values) of three reference genes between years and tissues of juvenile sockeye salmon smolts. "Predated" indicates predated samples, "Not" indicates control, or non-predated, sample. Asterisk (\*) indicates significant difference in Ct score between predated and non-predated samples for a given reference gene (t-test,  $\alpha = 0.05$ ).

152x203mm (300 x 300 DPI)

1 **Infected juvenile salmon can experience increased predation during**  
2 **freshwater migration**

3 Nathan B. Furey<sup>\*a</sup>, Arthur L. Bass<sup>b</sup>, Kristi M. Miller<sup>c</sup>, Shaorong Li<sup>c</sup>, Andrew G. Lotto<sup>b</sup>, Stephen  
4 J. Healy<sup>d</sup>, S. Matthew Drenner<sup>ef</sup>, and Scott G. Hinch<sup>b</sup>

5  
6 <sup>a</sup> Department of Biological Sciences, University of New Hampshire, Durham, USA

7 <sup>b</sup> Department of Forest and Conservation Sciences, University of British Columbia, Vancouver,  
8 Canada

9 <sup>c</sup> Fisheries and Oceans Canada, Molecular Genetics Section, Pacific Biological Station,  
10 Nanaimo, Canada

11 <sup>d</sup> Fisheries and Oceans Canada, Science Branch, Pacific Region, 4160 Marine Dr., West  
12 Vancouver, BC, V7V 1N6, Canada

13 <sup>e</sup> Stillwater Sciences, 555 W. Fifth St, 35th floor, Los Angeles, CA 90013; Marine Science  
14 Institute

15 <sup>f</sup> University of California Santa Barbara, Santa Barbara, USA

16 \* Corresponding author: [Nathan.Furey@unh.edu](mailto:Nathan.Furey@unh.edu)

18

**Abstract**

Predation risk for animal migrants can be impacted by physical condition. Although size- or condition-based selection is often observed, observing infection-based predation is rare due to the difficulties in assessing infectious agents in predated samples. We examined predation of outmigrating sockeye salmon (*Oncorhynchus nerka*) smolts by bull trout (*Salvelinus confluentus*) in southcentral British Columbia, Canada. We used a high-throughput quantitative polymerase chain reaction (qPCR) platform to screen for the presence of 17 infectious agents found in salmon and assess 14 host genes associated with viral responses. In one (2014) of the two years assessed (2014 and 2015), presence of infectious haematopoietic necrosis virus (IHNV) resulted in 16-25 times greater chance of predation; in 2015 IHNV was absent among all samples, predated or not. Thus, we provide further evidence that infection can impact predation risk in migrants. Some smolts with high IHNV loads also exhibited gene expression profiles consistent with a virus-induced disease state. Nine other infectious agents were observed between the two years, none of which were associated with increased selection by bull trout. In 2014, richness of infectious agents was also associated with greater predation risk. This is a rare demonstration of predator consumption resulting in selection for prey that carry infectious agents. The mechanism by which this selection occurs is not yet determined. By culling infectious agents from migrant populations, fish predators could provide an ecological benefit to prey.

**Key-words**

Predator-prey interactions, infectious hematopoietic virus, migratory culling, migration ecology, predation risk, Pacific salmon, pathogens, disease ecology

40

## 41 **Introduction**

42 Predators [1], infectious agents [2,3], and their interaction [4,5] play important roles in  
43 structuring communities and ecosystems. Both predators and infectious agents can apply strong  
44 selection pressures on prey and hosts, altering population-level phenotypes [4,6–8]. Infection can  
45 increase predation risk [9–11], presumably due to decreased ability to detect and/or evade  
46 predators, and/or increased conspicuousness to predators [12]. Infectious agents also affect  
47 animal migrants [13,14], migrations can act to reduce predation [15,16], and a few studies have  
48 found infection to increase predation risk of migrants (e.g. Mesa et al. [17]; Schreck et al. [18];  
49 and Hostetter et al. [19]).

50 Pacific salmon (*Oncorhynchus* spp.) are among the most studied animal migrants due to their  
51 ecological, economic, and cultural value. One of the migrations undertaken during the Pacific  
52 salmon life cycle is by juveniles, when smolts leave natal freshwater habitats and migrate  
53 downstream to the open ocean. Smolts can experience intense predation during downstream  
54 migration [20–22]. Recent research has linked smolt migration survival to the presence and/or  
55 prevalence of pathogens [23] and external signs of disease [19,24]. However, infection is merely  
56 the presence of a pathogen and does not necessarily indicate disease that could facilitate  
57 predation, but disease is difficult to assess in the field [25,26], especially when natural mortality  
58 is not observable [25].

59 Transcriptomics continue to be an increasingly valuable tool in linking animal responses to  
60 environmental conditions and other factors [27] and has proven to be a highly sensitive indicator  
61 in human disease diagnostics [28–31]. Recently, meta-analysis of multi-cohort microarray data  
62 based on six acute and chronic viral diseases revealed a panel of biomarkers consistently

1  
2  
3  
4  
5 63 associated with viral disease development in salmon [32]. Validation of the viral disease  
6  
7 64 development (VDD) biomarker panel using independent samples from infectious haematopoietic  
8  
9 65 necrosis virus (IHNV) challenge studies performed across multiple salmon species, and field  
10  
11 66 samples diagnosed pathologically with various viral and non-viral diseases showed that accurate  
12  
13  
14 67 classifications differentiating bacterial vs. viral diseases and latent infections vs. viral disease  
15  
16 68 could be realized with co-activation of as few as seven VDD biomarkers. Moreover, as  
17  
18 69 demonstrated in human diagnostic studies, the molecular panel could identify disease before  
19  
20  
21 70 clinical or morphological evidence can be observed [32,33], and due to the systemic nature of  
22  
23 71 viral infections, worked well across a range of tissues. The VDD technology has been  
24  
25 72 successfully applied to study disease development pathways for Piscine orthoreovirus (PRV) [33]  
26  
27  
28 73 and has led to the discovery of over a dozen novel viruses in salmon [34,35].  
29

30  
31 74 Among sockeye salmon (*Oncorhynchus nerka*) populations of the Fraser River watershed in  
32  
33 75 British Columbia, Canada, the population emigrating from Chilko Lake is among the largest and  
34  
35 76 most intensively studied. Each spring, 10 – 70 million juvenile sockeye salmon smolts leave the  
36  
37 77 lake and migrate downstream through a gauntlet of binge-feeding bull trout [36] and experience  
38  
39 78 high mortality in the clear, slow-moving waters of the Chilko River [37]. Combining acoustic  
40  
41  
42 79 telemetry with non-lethal biopsies and screening for infectious agents revealed a strong link  
43  
44 80 between mortality of migratory smolts and IHNV [23], but the mechanism of mortality was  
45  
46  
47 81 unable to be determined. IHNV is a coldwater virus found in North America, Europe, and Asia  
48  
49 82 [38]. IHNV appears most effective at infecting juvenile fish found in freshwater and at  
50  
51 83 temperatures between 10°C and 12°C [38]. In juvenile sockeye salmon, IHNV can be highly  
52  
53  
54 84 pathogenic [39,40], inducing high rates of mortality. It is suggested that sockeye salmon are  
55  
56  
57  
58  
59  
60

1  
2  
3  
4  
5 85 natural hosts of IHNv [40] and this virus has been present in Chilko Lake for at least several  
6  
7 86 decades [41].  
8  
9

10 87 We assess infection-based predation risk of migrant juvenile sockeye salmon (*Oncorhynchus*  
11  
12 88 *nerka*) smolts by piscivorous bull trout (*Salvelinus confluentus*) in Chilko Lake We tested smolt  
13  
14 89 tissue samples using TaqMan assays for 17 infectious agents suspected or known to cause  
15  
16  
17 90 disease in salmon [25], including IHNv. We use a subset of high-performing VDD biomarkers to  
18  
19 91 attempt to link predation and infection with genetic markers of active viral disease states [32].  
20  
21

22 92  
23

## 24 93 **Methods**

### 27 94 **Study area and field sampling**

28  
29 95 Sampling occurred at the Chilko Lake-River outlet in British Columbia, Canada, where sockeye  
30  
31  
32 96 salmon smolts emigrate downstream each spring and the federal fisheries agency (Fisheries and  
33  
34 97 Oceans Canada) installs a river-wide counting fence to estimate outmigrant abundance. To  
35  
36 98 compare infection status between predated and non-predated smolts, individuals were collected  
37  
38 99 from within bull trout stomachs, as well as at random from the emigrant population (details  
40  
41 100 below) between April 30, 2014 and May 15, 2014, and April 19, 2015 and May 5, 2015. Bull  
42  
43 101 trout were captured via dip net or hook and line either at (immediately upstream of) the counting  
44  
45 102 fence or in the 1.3-km stretch between the counting fence and lake outlet. Stomach contents from  
46  
47  
48 103 bull trout were collected via gastric lavage. When possible, freshly ingested smolts were  
49  
50 104 individually wrapped in foil and frozen in liquid nitrogen; when this was not possible, smolts  
51  
52 105 were frozen at -20°C for up to 72 hours before transferring to liquid nitrogen or a -80°C freezer  
53  
54  
55 106 for long-term storage; our assessments are not expected to be impacted by this short-term storage  
56  
57  
58  
59  
60

1  
2  
3  
4  
5 107 at -20°C. Non-predated smolts were collected via dipnet at the counting fence at night during the  
6  
7 108 outmigration and selected at random from a small plastic wash basin. Totals of 62 (32 predated,  
8  
9 109 30 not) and 39 (30 predated, 9 not) smolts collected in 2014 and 2015, respectively, were  
10  
11 110 selected for pathogen screening. Samples sizes of non-predated smolts in 2015 were low because  
12  
13  
14 111 the second year of the study was opportunistic with limited funding and the field season was  
15  
16 112 shortened by high flows in the Chilko River that affected other active research. We also wanted  
17  
18 113 to focus on infectious agents in predated fish, rather than broadly characterizing the pathogens  
19  
20  
21 114 found in wild sockeye salmon smolts. Every predated smolt was assigned a condition score as a  
22  
23 115 metric for degree of degradation or digestion such that we could assess the potential effects of  
24  
25 116 sample degradation on infectious agents and biomarker expression. Condition scores ranged  
26  
27  
28 117 between zero (no visible signs of digestion) and six (prey item unidentifiable) as in Furey et al.  
29  
30 118 [42]. To maximize the condition of smolts assessed, in 2014 only samples with condition scores  
31  
32 119 between zero and two were selected for molecular work. In 2015, only samples with scores  
33  
34  
35 120 between zero and 1.5 were selected.

### 36 37 121 **Laboratory sampling and analyses**

38  
39 122 In the lab, smolts were dissected to remove gill and liver tissues using aseptic technique. Tissue  
40  
41 123 samples were screened for the presence of 17 infectious agents (Table 1; Supplemental Materials  
42  
43 124 Table S1), using high-throughput quantitative real-time reverse transcriptase polymerase chain  
44  
45 125 reaction (ht-qRT-PCR). Infectious agents selected are among those known to infect salmonids  
46  
47  
48 126 worldwide. The biomarkers selected are all among those found to be capable of consistently  
49  
50  
51 127 identifying individuals experiencing viral disease [32]. In addition, 14 host genes found to be a  
52  
53 128 high-performing subset of genes capable of consistently distinguishing a fish in an active viral  
54  
55 129 disease state (i.e. VDD) [32] were assessed (Supplemental Materials Table S2). Individuals in a  
56  
57  
58  
59  
60



1  
2  
3  
4  
5 130 viral disease state demonstrate powerful co-activation of these viral disease development (VDD)  
6  
7 131 genes, which can be identified via strong separation along the first axis of multivariate analyses  
8  
9 132 including expression of groups of VDD genes [32]. One of these assays, HERC6, had low assay  
10  
11 133 efficiency and was excluded, leaving 13 host genes. Three liver samples from predated smolts  
12  
13  
14 134 were removed from analyses due to low reference gene expression.  
15  
16

### 17 135 **Molecular assessment of infectious agents and smolt gene expression**

18  
19 136 PCR was conducted on the Fluidigm BioMark™ HD nanofluidic platform (Fluidigm Corp.,  
20  
21 137 South San Francisco, USA). Gill and liver tissues were homogenized separately in TRI reagent  
22  
23 138 (Ambion Inc., Austin, TX) and 1-bromo-3-chloropropane was added to the homogenate. Total  
24  
25 139 RNA was extracted by methods previously described [25,43] using MagMAX™-96 for  
26  
27 140 Microarrays Total RNA Isolation Kits (Applied Biosystems, Foster City, CA, USA) with a  
28  
29 141 Biomek FXP automated liquid- handling instrument (Beckman Coulter, Indianapolis, IN, USA)  
30  
31 142 according to the manufacturer's instructions. The Biomek FXP was also used to automatically  
32  
33 143 normalize total RNA to 1.0 µg. cDNA was synthesized from normalized RNA using SuperScript  
34  
35 144 VILO MasterMix (Invitrogen, CA, USA) following manufacturer's instructions. The nanoliter  
36  
37 145 volume used for each qPCR reaction on the BioMark necessitates a pre-amplification step. Thus,  
38  
39 146 1.25 µL of cDNA from each sample was pre-amplified with primer pairs corresponding to all  
40  
41 147 assays in a 5-µL reaction volume using TaqMan Preamp Master Mix (Life Technologies) (see  
42  
43 148 Miller et al. [32]). Unincorporated primers were removed using ExoSAP-IT High-Throughput  
44  
45 149 PCR Product Clean Up (MJS BioLynx Inc., ON, CAN), and samples were diluted 1:5 in DNA  
46  
47 150 Suspension Buffer. The assay mix was prepared containing 9 µL primers and 2 µL probes for the  
48  
49 151 TaqMan assays.  
50  
51  
52  
53  
54  
55  
56  
57  
58  
59  
60

1  
2  
3  
4  
5 152 All assays were run in duplicate on the BioMark Dynamic Array. A serial dilution of artificial  
6  
7 153 positive constructs (APC clones) of all infectious agent assays was run as six samples. This serial  
8  
9 154 dilution allowed for the calculation of assay efficiency, and the copy numbers of the interest  
10  
11 155 targets. The APC clones contain an additional probe (VIC) that allows for the detection of  
12  
13 156 potential contamination caused by these highly concentrated samples. For biomarkers, assay  
14  
15 157 efficiency was assessed using a 5-sample serial dilution of pooled, pre-amplified samples. The  
16  
17 158 serial dilution was created by diluting the pooled sample in DNA suspension buffer. Three  
18  
19 159 reference gene assays (S100 calcium binding protein [COIL, Coiled-coil domain-containing  
20  
21 160 protein 84 [786d16.1P], and 39S ribosomal protein L40, mitochondrial precursor [MrpL40]),  
22  
23 161 were included to assess sample quality and normalize biomarker gene data. A 5  $\mu$ L sample mix  
24  
25 162 was prepared [2.5 uL of TaqMan Gene Expression Master Mix (Life Technologies), 0.25 uL of  
26  
27 163 20X GE Sample Loading Reagent (Fluidigm), 2.25 uL of pre-amplified cDNA], which was  
28  
29 164 added to each assay inlet of the array following manufacturer's recommendations. After loading  
30  
31 165 the assays and samples into the chip by an IFC controller HX (Fluidigm), PCR was performed  
32  
33 166 with the following conditions: 50°C for 2 min, 95°C for 10 min, followed by 40 cycles of 95°C  
34  
35 167 for 15 s and 60°C for 1 min.

36  
37 168 Cycle threshold (Ct) was determined using the Biomark Real-Time PCR analysis software.  
38  
39 169 Reaction curves for each positive sample-assay combination were visually evaluated for  
40  
41 170 abnormal curve shapes, close correspondence between replicates, and presence of APC  
42  
43 171 contamination as indicated by VIC positives. Using R [44], efficiency was calculated for each  
44  
45 172 assay, results where only one duplicate was positive for a sample-assay combination were  
46  
47 173 removed, limit of detection thresholds (above which, samples were considered negative [32])  
48  
49  
50  
51  
52  
53  
54  
55  
56  
57  
58  
59  
60

1  
2  
3  
4  
5 174 applied, VIC positive samples removed, and duplicates averaged. Ct scores for infectious agents  
6  
7 175 were converted to RNA copy number per well using the standard curve for each assay.  
8  
9

### 10 176 **Reference gene performance and sample degradation potential**

11  
12 177 For all samples, we assessed the performance of three reference genes (S100 calcium COIL,  
13  
14 178 786d16.1P, and MrpL40) that should be expressed at relatively similar levels among all samples.  
15  
16 179 We wanted to examine their performance due to the possibility of samples degrading while in a  
17  
18 180 bull trout's stomach (which would only affect predated samples). Samples were removed if  
19  
20 181 expression of any reference gene was 1.5-times the interquartile range below the first quartile of  
21  
22 182 gene- and tissue-specific values (e.g. an outlier). Only four samples, one liver sample collected in  
23  
24 183 2014 and three liver samples collected in 2015, met this criterion and were removed. To further  
25  
26 184 assess the potential effects of sampling in both predated and non-predated samples we visually  
27  
28 185 assessed the expression of the three reference genes between predated statuses for all year-tissue  
29  
30  
31 186 combinations.  
32  
33  
34  
35

### 36 187 **Data analyses**

37  
38 188 To determine if infectious agents were more prevalent (i.e. greater percent of samples that were  
39  
40 189 positive) in predated smolts than in smolts caught by dipnet, a Fisher's exact test was conducted  
41  
42 190 for each pathogen for each tissue and year, along with the calculation of the odds ratio for  
43  
44 191 infection in predated vs non-predated samples. We used a false-discovery-rate adjusted  $\alpha = 0.05$   
45  
46 192 to assess significance. For any infectious agent found to be more prevalent in predated samples,  
47  
48 193 we determined if fish size (fork length; FL) varied between infection-positive and infection-  
49  
50 194 negative fish using a t-test. When FL was not measured directly, it was estimated from total  
51  
52 195 length (TL) or post-orbital hypural (POH) measurements via regression (Furey, unpublished  
53  
54  
55  
56  
57  
58  
59  
60

1  
2  
3  
4  
5 196 data). To determine if predated smolts had a greater diversity of infectious agents within their  
6  
7 197 tissues, the Shannon diversity index per sample was calculated using the “diversity” function in  
8  
9 198 the vegan package [45] in R [44] and compared via a Mann-Whitney U test on ranks.  
10  
11  
12 199 To further characterize the relationships among infection, fish length, tissue sampled, and  
13  
14 200 predation, generalized models (GLM) were used. Four global models were constructed, one for  
15  
16 201 each year-tissue combination due to the imbalance in sample sizes of predated and non-predated  
17  
18 202 fish between years and some infectious agents being present in one year and not the other (see  
19  
20 203 Results). Predation status was the response variable, with smolt FL and presence or absence of  
21  
22 204 infectious agents as explanatory variables. In 2015, 12 smolts did not have any lengths recorded,  
23  
24 205 and these fish were removed from GLM analyses. Two age classes emigrate from Chilko Lake,  
25  
26 206 British Columbia. Age-1 smolts constitute on average ~96% of the migrating population, while  
27  
28 207 age-2 are substantially larger but make up ~4% of the migration [46]. Of the 32 predated smolts  
29  
30 208 assessed in 2014, 8 of them were age-2 (classified as those >116 mm FL; Brian Leaf, DFO, pers.  
31  
32 209 comm.), all of which were predated. Thus, age-2 smolts were removed from 2014 GLM  
33  
34 210 analyses, as they were only present in the predated group (and thus age and FL were  
35  
36 211 confounded). Only infectious agents that were detected at least twice in a given tissue-year  
37  
38 212 combination were included. Infectious agents that were found among all samples were not  
39  
40 213 included. Global models were constructed in R [44]. Candidate models were ranked via AICc  
41  
42 214 using all-subsets regression via the MuMIn package [47] in R [44]. To prevent overfitting due to  
43  
44 215 our small sample sizes, the maximum number of parameters in each candidate model was limited  
45  
46 216 to three (not including the intercept). The model with the lowest AICc was considered further as  
47  
48 217 the most parsimonious and we present all models with  $\Delta AICc < 3$ .

1  
2  
3  
4  
5 218 Cycle threshold (Ct) scores were transformed using a standard curve of known infectious agent  
6  
7 219 RNA concentrations to represent RNA copy number per PCR well. Principal components  
8  
9 220 analysis (PCA) was used to visualize variability in VDD gene expression among samples.  
10  
11 221 Separate PCAs were run for each year-tissue combination (four in total). PCA results were  
12  
13 222 assessed visually to determine relationships between VDD gene expression and both predation  
14  
15 223 and infection status, focusing on groupings of samples along the first two axes. All analyses were  
16  
17 224 completed in R 3.5.1 [44], with PCAs conducted with the ‘prcomp’ function.  
18  
19  
20  
21

## 22 225 **Results**

### 23 226 **Infectious agents**

24  
25  
26 227 Among the 17 infectious agents screened for, 10 (including IHNV) were found to be in sampled  
27  
28 228 smolts between the two years and tissues (Table 1). IHNV was only observed in 2014, but its  
29  
30 229 prevalence dramatically differed between predated (87.5% in gill and 35.5% in liver) and non-  
31  
32 230 predated (20% in gill and 3.3% in liver) samples. The odds of IHNV infection in gill was 25.8-  
33  
34 231 times greater for predated than non-predated smolts (Fisher exact test, fdr-corrected  $P < 0.0001$ )  
35  
36 232 and 15.3-times greater in liver (Fisher exact test, fdr-corrected  $P = 0.007$ ). IHNV prevalence did  
37  
38 233 not differ between age-1 and age-2 predated smolts (Supplementary Materials). T-tests  
39  
40 234 comparing mean fork length between fish positive and negative for IHNV in 2014 found no  
41  
42 235 significant difference in size in either gill ( $P = 0.75$ ) or liver tissues ( $P = 0.86$ ). No pathogen  
43  
44 236 aside from IHNV was found to be statistically more prevalent in predated samples than non-  
45  
46 237 predated. ‘*Candidatus Branchiomonas cysticola*’ was found in ~94% of all samples. Although  
47  
48 238 not significantly so, most observed infectious agents were observed at higher prevalence in  
49  
50 239 predated samples than not, with *Flavobacterium psychrophilum* being 1.4 – 3.9-times more  
51  
52  
53  
54  
55  
56  
57  
58  
59  
60

1  
2  
3  
4  
5 240 likely to be found in predated smolts among all tissue-year combinations. *Ichthyophthirius*  
6  
7 241 *multifiliis* was not found in any liver samples in 2014, (and only in two liver samples in 2015,  
8  
9 242 both predated), but in both years of gill samples, the agent was consistently found more often in  
10  
11 243 predated samples. No pathogen was found to be more prevalent in non-predated samples in more  
12  
13 244 than one tissue-year combination (Table 1); in the three instances where a pathogen was found  
14  
15 245 more often in non-predated samples, none were statistically significant (all *fdr*-corrected  $P >$   
16  
17 246 0.05). The Shannon diversity index of infectious agents was significantly greater in predated  
18  
19 247 samples for both gill (Mann-Whitney U test;  $P < 0.001$ ) and liver (Mann-Whitney U test;  $P =$   
20  
21 248 0.02) tissues in 2014 (Figure 1). In 2015 samples, the diversity index did not vary between  
22  
23 249 predated and non-predated samples in either tissue (Mann-Whitney U test;  $P > 0.05$ ).

24  
25  
26  
27  
28 250 Use of GLMs revealed similar, but also additional relationships between infection and predation  
29  
30 251 risk (Table 2) to the pathogen-by-pathogen approach. IHNv was retained in all 2014 models with  
31  
32 252  $\Delta AICc < 3$ , for both gill and liver, with increased predation risk associated with infection.  
33  
34 253 However, the top-ranked 2014-gill model also revealed a potential increased probability of  
35  
36 254 predation for smolts infected with *Ichthyophthirius multifiliis*. Similarly, both 2015 models  
37  
38 255 showed positive relationship between predation and presence of *Ichthyophthirius multifiliis*  
39  
40 256 (Table 2). Lastly, the top-ranked 2015-liver model also suggested that infection with *Candidatus*  
41  
42 257 *Branchiomonas cysticola* was associated with reduced chance of predation risk, as it was found  
43  
44 258 in 100% of predated samples, but only two-thirds of predated samples (Table 1; Table 2).

### 259 **Fork length and age**

50  
51  
52 260 Among GLMs, the 2014-liver models and all 2015 models suggested that smaller fish were at  
53  
54 261 greater risk of predation (negative FL coefficient; Table 2). This relationship was consistent  
55  
56  
57  
58  
59  
60

1  
2  
3  
4  
5 262 among year-tissue combinations, with all models  $\Delta AICc < 3$  containing FL, including the top  
6  
7 263 models. In 2014 samples, mean FL of smolts did not differ between IHN+ and IHN- smolts, in  
8  
9 264 both gill ( $t = 0.46$ ,  $df = 39$ ,  $P = 0.64$ ), and liver ( $t = -0.12$ ,  $df = 40$ ,  $P = 0.90$ ) tissues. Similarly, the  
10  
11 265 prevalence of IHN (0.875) was the same between age-1 (21 of 24) and age-2 (7 of 8) predated  
12  
13  
14 266 smolts in 2014, and thus the inclusion of age-2 fish in our predated sample did not bias IHN  
15  
16 267 prevalence in predated fish.  
17  
18

### 19 268 **Gene expression**

20  
21 269 PCAs on 2014 VDD gene expression data (the year in which IHNv was present) revealed three  
22  
23 270 smolts that exhibited strong separation along the first PC axis (most positive PC1; Figure 2). This  
24  
25 271 strong separation was apparent in both gill and liver tissues (Figure 2), and these three same  
26  
27 272 smolts had among the highest tissue-specific loads of IHNv (Figure 2). An additional fourth gill  
28  
29 273 2014 sample exhibited the same strong separation on the first PC axis, but was not included in  
30  
31 274 liver analyses due to poor reference gene performance. Aside from these individuals, PCA in  
32  
33 275 both years also demonstrated further shifts in VDD gene expression between predated and non-  
34  
35 276 predated smolts in at least one of the first two PC axes, regardless of year or tissue (Figure 2).  
36  
37 277 There was some tissue- and year-specific variability; separation for 2015 gill samples was most  
38  
39 278 clearly along PC1, while the other year-tissue combinations (aside from the three high-IHN-  
40  
41 279 loaded individuals) demonstrated stronger shifts along PC2 (Figure 2).  
42  
43  
44  
45  
46  
47  
48  
49

### 50 281 **Sample degradation potential**

51  
52 282 All three reference genes demonstrated higher expression (lower Ct scores) in non-predated  
53  
54 283 samples in gills for both years (786d16.1P was significantly different in both years, COIL  
55  
56  
57  
58  
59  
60

1  
2  
3  
4  
5 284 significantly different in 2014, MrpL40 not significantly different in either year; t-test,  $\alpha = 0.05$ ;  
6  
7 285 Figure 3). Conversely, all three reference genes demonstrated lower expression (higher Ct  
8  
9 286 scores) in non-predated samples in livers in both years (COIL significantly so in both years,  
10  
11 287 MrpL40 in 2015, and 786d16.1P in neither; Figure 3).

12  
13  
14 288 There was no significant relationship between IHN loads and condition score for predated, IHN+  
15  
16 289 smolts for both gill (Pearson correlation = 0.31,  $df = 26$ ,  $t = 1.68$ ,  $P = 0.10$ ) and liver (Pearson  
17  
18 290 correlation coefficient = 0.22;  $df = 10$ ,  $t = 0.73$ ,  $P = 0.48$ ). However, IHN+ gill samples came  
19  
20 291 from predated smolts with a significantly higher condition score (i.e. more digested) than  
21  
22 292 predated smolts that were IHN- (mean score IHN+ = 1.4, mean score IHN- = 0.5, t-test,  $t = 2.60$ ,  
23  
24 293  $df=30$ ,  $P = 0.01$ ). However, condition scores did not differ between IHN+ and IHN- predated  
25  
26 294 smolt samples in liver samples (mean score IHN+ = 1.5, mean score IHN- = 1.1, t-test,  $t = 1.60$ ,  
27  
28 295  $df = 29$ ,  $P = 0.12$ ).

29  
30  
31  
32  
33 296

34  
35  
36 297

37  
38  
39 298

## 40 41 299 **Discussion**

42  
43  
44 300 IHNv-positive smolts in 2014 were 16-to-25-times more likely to be predated than not. It is  
45  
46 301 uncommon for studies to make direct links between infection and predation risk outside of  
47  
48 302 experimental settings (but see [9,11,17,25,48,49]). Field studies on infection-based risk for fishes  
49  
50 303 have focused on avian predators [18,25]. Miller *et al.* [25], used an approach similar to ours to  
51  
52 304 demonstrate pathogen-based predation risk for wild salmon, with rhinoceros auklets (*Cerorhinca*  
53  
54 305 *monocerata*) feeding more heavily on marine sockeye salmon smolts infected with *Parvicapsula*



1  
2  
3  
4  
5 306 *spp.* parasites. Although not focused on predation, Jeffries et al. [23] found within our study  
6  
7 307 system that most (>80%) IHNv-positive Chilko sockeye salmon smolts tracked with acoustic  
8  
9 308 telemetry perished early in the migration, suggesting an association between IHNv infection and  
10  
11 309 smolt mortality, and our results indicate that predation is the likely mechanism for at least a  
12  
13 310 portion of this mortality.

14  
15  
16  
17 311 IHNv is a single-stranded RNA virus that generates an acute, systemic disease that causes  
18  
19 312 necrosis of hematopoietic tissues of the kidney and spleen, as well as damage to several other  
20  
21 313 organs [50]. For juvenile sockeye, virulence is high [39] and can result in high mortality [40] 4 –  
22  
23 314 20 days after exposure [51], but outbreaks are generally limited to cooler waters below 15°C  
24  
25 315 [38]. IHNv's presence in Chilko Lake has been known for >40 years [41]. How infection of  
26  
27 316 IHNv results in increased predation by bull trout remains unclear. It is assumed that these  
28  
29 317 infectious agents either reduce a smolt's probability of escaping a predation attempt when  
30  
31 318 targeted [17], or increase the predator's propensity to target the smolt. Either possibility would  
32  
33 319 probably rely upon changing body coloration [52] or changing swimming behavior or  
34  
35 320 performance that can occur with infection [53,54]; IHN can result in lethargy, hyperactivity, or  
36  
37 321 erratic swimming [54]. Further work, such as experimental swim trials or high-resolution  
38  
39 322 tracking, is needed to determine the behavioral consequences of infection in migratory smolts,  
40  
41 323 and how this might result in increased predation risk. Such research would further develop our  
42  
43 324 understanding of how infections and movements, including migrations, interact to affect  
44  
45 325 individuals, populations, and communities [14,55].

46  
47 326 Although IHNv demonstrated the strongest links between predation risk and infection,  
48  
49 327 *Ichthyophthirius multifiliis* was also associated with increased predation risk via GLMs in three  
50  
51  
52  
53  
54  
55  
56  
57  
58  
59  
60

1  
2  
3  
4  
5 328 of the four year-tissue combinations. *Ichthyophthirius multifiliis* was only found in predated  
6  
7 329 samples in both gill and liver tissues in 2015, and thus an odds ratio could not be calculated, but  
8  
9 330 in 2014 gill samples, this infectious agent was associated with a ~5-fold increase in predation  
10  
11 331 risk. This freshwater ciliate can induce mortality in fishes [56,57], including documented  
12  
13 332 epizootics in a wild population of spawning Fraser River sockeye salmon [58]. The parasite  
14  
15 333 targets epithelial tissue, and damage to gills leads to oxygen starvation and acidosis [57]. Thus,  
16  
17 334 *Ichthyophthirius multifiliis* can reduce swimming capacity of hosts [59]. In contrast to IHNV, the  
18  
19 335 likelihood of infection with this globally-distributed parasite increases with rising water  
20  
21 336 temperature (as a result of reduced generation time; [57,60].  
22  
23  
24  
25

26 337 Lastly, one model (representing liver samples in 2015) suggested that infection of *Candidatus*  
27  
28 338 *Branchiomonas cysticola* resulted in reduced predation risk. But this infectious agent was quite  
29  
30 339 prevalent among all samples, with a prevalence rate between 90-100% except for predated liver  
31  
32 340 samples (67%), including 100% prevalence in predated and non-predated gill samples. Thus, our  
33  
34 341 results likely reflect an ubiquitous infectious agent in this population and caution  
35  
36 342 overinterpreting of the GLM result implying reduced predation risk. Multiple studies from our  
37  
38 343 research group have found high incidence of this pathogen with no accompanying physiological  
39  
40 344 or survival impact [61 – 63], including in this population of sockeye salmon smolts [64] and  
41  
42 345 research from Norway suggested that despite its 100% prevalence in Atlantic salmon gill  
43  
44 346 epitheliocysts, this bacteria was not associated with gill disease [65].  
45  
46  
47  
48  
49

50 347 The presence of an infectious agent, without an indication of tissue damage or an immunological  
51  
52 348 response (such as the VDD gene panel used in this study), is not evidence of infectious disease.  
53  
54 349 Therefore, unsurprisingly, most of the infectious agents detected in this study were not  
55  
56  
57  
58  
59  
60

1  
2  
3  
4  
5 350 associated with increased predation risk. Furthermore, the virulence of an infection is dependent  
6  
7 351 upon the interaction of aspects of the host, its environment, and the pathogen. Salmon  
8  
9 352 populations that have coevolved with endemic pathogens may be immunologically equipped to  
10  
11 353 resist physiological impairment [66] and some pathogens may disrupt homeostasis primarily in  
12  
13 354 the context of environmental stressors, a pertinent example being the importance of cool  
14  
15 355 temperatures for IHNv virulence [40].  
16  
17  
18

19 356 In addition to the prevalence of specific agents, the diversity of infectious agents detected was  
20  
21 357 higher in predated samples in both tissues in 2014. Similarly, rhinoceros auklets fed more  
22  
23 358 heavily on sockeye salmon smolts with higher pathogen richness [25]. Although the mechanism  
24  
25 359 for a correlation between pathogen diversity and predation status is unclear, we hypothesize that  
26  
27 360 smolts with greater diversity of infectious agents are likely physiologically compromised.  
28  
29  
30 361 Although diversity metrics (or other metrics such as relative infection burden [63]) can describe  
31  
32 362 the variability in infections in terms of presence and load of multiple infections, infectious agents  
33  
34 363 can interact in complex ways. In certain circumstances coinfection can exacerbate existing or  
35  
36 364 generate new physiological issues for the host [67,68] or even mediate impacts through  
37  
38 365 competitive or antagonistic interactions [69-71]. Thus, further work should focus not only  
39  
40 366 specific infections or the number of unique infections, but also the combination of infections and  
41  
42 367 their loads.  
43  
44  
45  
46

47 368 Regardless of the mechanism, we provide evidence that infections can increase predation risk of  
48  
49 369 fish in the wild. Predation on juvenile salmonids has long been of interest, with research focused  
50  
51 370 on quantifying the number of salmon lost via avian [72,73] predators and piscivorous fishes  
52  
53 371 [74,75] alike. However, it appears in this system that the impacts of predation by bull trout and  
54  
55  
56  
57  
58  
59  
60

1  
2  
3  
4  
5 372 infection are not additive sources of mortality, but rather compensatory. There is increasing  
6  
7 373 recognition that predators of salmon exert selective pressures [19,25,76], but it remains difficult  
8  
9 374 to quantify the interactions among various biological and environmental conditions influencing  
10  
11 375 mortality [25].

12  
13  
14 376 Our assessment of infectious agent influences on predation risk is dependent upon multiple  
15  
16 377 assumptions, including that once ingested, an infected smolt cannot infect others. IHNv-infected  
17  
18 378 smolts, however, were in worse condition (a proxy for longer duration in the gut) than those that  
19  
20 379 were not infected (in gill samples, but not liver samples), which may be evidence of transmission  
21  
22 380 post-ingestion. If cross-contamination of IHNv within the gut does occur, it could be through the  
23  
24 381 gills, which were the only externally exposed tissue sampled. As IHNv can be present in mucus  
25  
26 382 [77], it is plausible that cross-contamination could occur (subsequently increasing the prevalence  
27  
28 383 of infectious agent-positive fish in the predated sample). Restricting sampling to only internal  
29  
30 384 organs in future studies could minimize this risk. With cessation of circulation post-mortem  
31  
32 385 within the fish, we feel it is highly unlikely that an infection could travel between gills and liver  
33  
34 386 once in the bull trout's stomach. Cross-contamination after ingestion would be more likely if  
35  
36 387 infectious agents could persist and proliferate after host death. Stomach acid, however, is a  
37  
38 388 hostile environment that is thought to have evolved in vertebrates not only to aid digestion, but to  
39  
40 389 protect against infectious agents [78,79], which would help to prevent productivity after  
41  
42 390 ingestion. It is also possible that we observed greater prevalence of IHNv in gills rather than  
43  
44 391 livers due to heavy infections in the gills represented a more developed infection where the virus  
45  
46 392 can be detected in all tissues, if the liver degrades more quickly postmortem. Examining multiple  
47  
48 393 tissues simultaneously may also assist in determining infection or disease progression.

1  
2  
3  
4  
5 394 Another assumption of our study is that IHNV is not transferred from bull trout to ingested  
6  
7 395 smolts. Although IHNV can infect a variety of North American salmonids [80], to our knowledge  
8  
9 396 it has never been documented in bull trout, albeit implicated in a historical population collapse in  
10  
11 397 Lake Chelan, Washington [81]. Susceptibility to IHNV is species- and experience-dependent,  
12  
13 398 with other chars exhibiting more resilience than sockeye salmon [80]. If bull trout exhibit similar  
14  
15 399 resilience, it seems likely that their infection rates and loads would be low relative to those  
16  
17 400 observed in sockeye salmon smolts. If bull trout are susceptible IHNV or any other screened  
18  
19 401 infectious agent, it is certainly feasible for these fish to become infected due to repeated  
20  
21 402 exposures via feeding on smolts during the outmigration. Ingestion of a virus can possibly result  
22  
23 403 in infection transmission [82], leading to concerns over the use of wild baitfish in hatcheries or  
24  
25 404 moving baitfish into new systems [83]. It remains unknown, however, if the ingestion of a smolt  
26  
27 405 would provide an appropriate mechanism for infectious agent transfer from bull trout to smolts,  
28  
29 406 and thus further research could address the validity of this assumption. Regardless, our work  
30  
31 407 presents compelling evidence for the influence for fish health to impact predation risk.  
32  
33  
34  
35  
36  
37

38 408 Lastly, IHNV infection does not appear to be confounded by smolt size or age. IHNV affects fish  
39  
40 409 quickly [40], and thus feeding might not be impacted for a long enough duration to generate size  
41  
42 410 differences among infected and uninfected smolts. Similarly, IHNV had equal prevalence in  
43  
44 411 predated samples between the two age classes of smolts emigrating the lake. Thus, IHNV  
45  
46 412 infection likely affects predation risk independent of size, which commonly correlates with  
47  
48 413 survival in juvenile fishes [84].  
49  
50  
51

52 414 Even though IHNV was not confounded by size, our analyses found evidence of size-based  
53  
54 415 selection, with bull trout consuming smaller fish, supporting earlier findings in this system [42].  
55  
56  
57  
58  
59  
60

1  
2  
3  
4  
5 416 Increased size of fish can both reduce potential gape-limited predators and improve ability to  
6  
7 417 evade predators [84]. Bull trout are likely not affected by gape, and thus size-based predation  
8  
9 418 risk is likely due to increased swimming performance of larger smolts. Smaller sockeye salmon  
10  
11 419 smolts are also disproportionately fed upon by rhinoceros auklets in the marine environment  
12  
13  
14 420 [76], and thus larger smolt sizes may continually be selected for throughout both freshwater and  
15  
16 421 marine portions of the outmigration. However, we acknowledge our sample size is small for  
17  
18 422 investigating size-based predation risk as this paper focuses more on the role of infection.  
19  
20  
21 423 Gene expression of markers shown to be predictive of viral disease development [32] differed  
22  
23 424 between predated and not-predated smolts. In particular, three individuals with high IHN loads in  
24  
25 425 2014 separated clearly along the first PC axis in both tissues (and a fourth gill sample), a  
26  
27 426 signature observed in other IHNv-infected fish known to be in a viral disease state [32]. Thus,  
28  
29 427 these individuals, all predated, were likely experiencing consequences of disease, an anecdotal  
30  
31 428 but rare link between disease and predation. There was also some separation between other  
32  
33 429 predated and not-predated individuals via PCA (i.e. 2015 samples when IHNv was not present)  
34  
35 430 that could possibly be due to an undetected infectious agent. However, we hesitate to attribute  
36  
37 431 these differences to predation selection, as these differences were of smaller magnitude, and we  
38  
39 432 cannot discount the possibility that gene expression was affected by sample degradation as IHN+  
40  
41 433 smolts were in worse condition than those IHN- (see below). However, we are confident that the  
42  
43 434 strong response from the four fish with high IHNv loads is not due to degradation, as these  
44  
45 435 samples separate from non-predated from other predated samples in the opposite direction along  
46  
47 436 the first PC axis and to a much larger degree (we also observe strong separation when we  
48  
49 437 conduct a PCA on the predated samples only, providing further evidence of a biologically  
50  
51  
52  
53  
54  
55  
56  
57  
58  
59  
60

1  
2  
3  
4  
5 438 relevant signal; Figure S1). Recent work assessing gene expression in gill biopsies on smolts  
6  
7 439 tracked with acoustic telemetry found high IHNv loads to be associated with VDD genes and the  
8  
9 440 first PC axis, but did not find IHNv presence to correlate with survival [64], unlike this study and  
10  
11 441 Jeffries et al. [23]. However, Stevenson et al. [64] tagged fewer fish with biopsies relative to  
12  
13 442 Jeffries et al. [23] and still found age-2 fish that perished in the first 14 km of migration to have  
14  
15 443 high PC1 scores that were associated with elevated IHNv loads [64]. Thus, more work is needed  
16  
17 444 to determine the dynamics of IHNv in the system and the interannual variability in its impacts on  
18  
19  
20  
21 445 smolts.

22  
23  
24 446         Reference genes demonstrated that predated samples had lower expression than non-  
25  
26 447 predated samples in gills, but higher expression in liver, although most values were highly  
27  
28 448 overlapping. Although it is difficult to explain why one tissue would react differently than the  
29  
30 449 other regarding gene expression, the lower expression of predated gill samples could be the  
31  
32 450 result of sample degradation. The gills, being an external tissue, would be more exposed to the  
33  
34 451 bull trout's stomach acids and digestive processes than the liver tissue. Sample degradation, or  
35  
36 452 any factor that would result in a shift of gene expression between predated and non-predated  
37  
38 453 samples, would affect our ability to test for predation-based impacts. For example, we see  
39  
40 454 consistent shifts in gene expression based on predation status using PCA, but we cannot  
41  
42 455 demonstrate that these differences are not due to sample degradation alone. The separation  
43  
44 456 between predation statuses apparent via PCA could be attributed to differences in gene  
45  
46 457 performance in the assays or could reflect cellular post-mortem transcriptional shifts, which have  
47  
48 458 been documented to occur in zebrafish, mice, and humans [85,86]. However, we see much larger  
49  
50 459 separation in multivariate space regarding VDD gene expression in four samples with high IHNv  
51  
52  
53  
54  
55  
56  
57  
58  
59  
60

1  
2  
3  
4  
5 460 loads in 2014, that load within the PCA in an opposite direction from other predated samples.  
6  
7 461 We also still see strong separation of these same individuals along the first PC axis when  
8  
9 462 conducting a PCA on only predated fish, indicating unique gene expression regardless of  
10  
11 463 predation status (Figure S1). This panel has also been effectively applied to recently dead and  
12  
13 464 live sampled farmed salmon to differentiate fish in an active viral disease state, with findings  
14  
15 465 validated through pathology, providing evidence that these signatures are retained after death  
16  
17 466 [85]. Other recent work suggest that RNA can indeed remain intact post-mortem, although the  
18  
19 467 responses are gene-specific [86,87]. Therefore, we are confident these three or four samples are  
20  
21 468 indeed expressing the screened VDD genes in a distinct matter. If post-mortem sample  
22  
23 469 degradation is a factor for at least some host genes, we do not expect infectious agents to be as  
24  
25 470 adversely affected, as microbes can survive passage through the gut of a predator, and therefore  
26  
27 471 can continually produce mRNA transcripts, maintaining our ability to detect their presence after  
28  
29 472 death of the host. In addition, tissue selection may also affect ability to detect and assess  
30  
31 473 infection and needs to be considered when interpreting each infectious agent. For example, the  
32  
33 474 kidneys would be more ideal for further assessments of IHNV, given that this virus causes  
34  
35 475 disease within this tissue.  
36  
37  
38  
39  
40

41 476 In conclusion, we provide evidence that specific infections can be associated with higher  
42  
43 477 predation risks in wild fish, suggesting compensatory mortality. Predation may therefore aid  
44  
45 478 ‘migratory culling’ [13,14], where the physiological impacts of infection prevent successful  
46  
47 479 migration in some individuals, reducing pathogen prevalence, burdens, and transmission in the  
48  
49 480 population. Indeed, Mesa et al. [17] suggested that avian predation on smolts with BKD may  
50  
51 481 explain why high infectious loads of *Renibacterium salmoninarum* are relatively rare in the  
52  
53 482 Columbia River. The potential for migratory culling has important implications for management  
54  
55  
56  
57  
58  
59  
60



1  
2  
3  
4  
5 483 such as predator control [88]. If fish are compromised upon migration, survival may be poor  
6  
7 484 regardless of predators. Thus, control of native predators may not have the intended effects on  
8  
9 485 prey [89] and it is important to attempt to identify selection processes predators place on prey  
10  
11 486 such as juvenile salmon (i.e. [12, 76]). The ability for predators to facilitate or affect migratory  
12  
13 487 culling is likely dependent upon the specific qualities of the predators, the migrants and their  
14  
15 488 movement behaviors, the infection(s), and experienced environmental conditions. For instance,  
16  
17 489 the ability of the pathogen to spread before predation, or potential for other forms of transmission  
18  
19 490 (prey to predator, or vertically during other life stages) are likely to affect potential for predation-  
20  
21 491 assisted migratory culling. More broadly, it appears imperative to include infectious agents  
22  
23 492 within monitoring of important fish populations, particularly with the possibility for individual  
24  
25 493 host-infection relationships to interact with climate change and warming waters, with some  
26  
27 494 infections potentially becoming less prevalent (such as IHN<sub>v</sub>, generally limited to colder waters  
28  
29 495 [38]), and others more [90,91], such as *Ichthyophthirius multifiliis* [90].  
30  
31  
32  
33  
34  
35  
36  
37  
38

## 39 498 **Ethics**

40  
41  
42 499 This research was approved by the University of British Columbia Animal Ethics Committee  
43  
44 500 (animal care permit: A11-0125) in accordance with the Canadian Council of Animal Care.  
45  
46

## 47 501 **Data Accessibility**

48  
49  
50 502 Data are available via Dryad ([92] DOI:10.5061/dryad.12jm63xw2).  
51  
52

## 53 503 **Author Contributions**

54  
55  
56  
57  
58  
59  
60

1  
2  
3  
4  
5 504 NBF, ALB, KMM, and SGH conceived and planned the work. NBF, ALB, SJH, AGL, and SMD  
6  
7 505 contributed to field sampling. ALB, SL, KMM led laboratory processing. NBF and ALB  
8  
9 506 conducted analyses. All authors wrote, edited, and gave final approval for submission of the  
10  
11 507 manuscript.

## 14 508 **Competing Interests**

16  
17 509 We have no competing interests.

## 19 510 **Funding**

21  
22  
23 511 Work was supported by the Pacific Salmon Foundation and the Salish Sea Marine  
24  
25 512 Survival Project (contribution #XX), Canada's Ocean Tracking Network, Genome British  
26  
27 513 Columbia (Strategic Salmon Health Initiative), MITACS Accelerate program, NSERC  
28  
29 514 Discovery grant to Hinch, Canada Foundation for Innovation, and Fisheries Society of the  
30  
31 515 British Islands small grants program.

32  
33  
34 516

## 35 517 **Acknowledgements**

36  
37  
38  
39 518 We thank G William, C Middleton and V Minke-Martin for field assistance, A Tabata for  
40  
41 519 database assistance, the Tsilhqot'in National Government and Xenigwet'in First Nation for  
42  
43 520 field access, and Fisheries and Oceans Canada Stock Assessment. Some data provided in Table  
44  
45 521 1 were provided by the Strategic Salmon Health Initiative (SSHI) funded by Genome British  
46  
47 522 Columbia, Pacific Salmon Foundation, and Fisheries and Oceans, Canada. We thank T Ming  
48  
49 523 and K Kaukinen for analysing SSHI samples, and D Patterson and field crews for collection of  
50  
51 524 SSHI samples.

52  
53  
54  
55 525

1  
2  
3  
4  
5  
6  
7  
8  
9  
10  
11  
12  
13  
14  
15  
16  
17  
18  
19  
20  
21  
22  
23  
24  
25  
26  
27  
28  
29  
30  
31  
32  
33  
34  
35  
36  
37  
38  
39  
40  
41  
42  
43  
44  
45  
46  
47  
48  
49  
50  
51  
52  
53  
54  
55  
56  
57  
58  
59  
60

527 **References**

- 528 1. Carpenter SR, Kitchell JF. 1988 Consumer Control of Lake interactions among lake  
529 organisms. Large-scale experimental manipulations reveal complex interactions among  
530 lake organisms. *Bioscience* **38**, 764–769.
- 531 2. Kiesecker JM, Blaustein AR. 1999 Pathogen reverses competition between larval  
532 amphibians. *Ecology* **80**, 2442–2448. (doi:10.1890/0012-  
533 9658(1999)080[2442:PRCBLA]2.0.CO;2)
- 534 3. Tack AJM, Dicke M. 2013 Plant pathogens structure arthropod communities across  
535 multiple spatial and temporal scales. *Funct. Ecol.* **27**, 633–645. (doi:10.1111/1365-  
536 2435.12087)
- 537 4. Edeline E, Ari T Ben, Vøllestad LA, Winfield IJ, Fletcher JM, James J Ben, Stenseth NC.  
538 2008 Antagonistic selection from predators and pathogens alters food-web structure. *Proc.*  
539 *Natl. Acad. Sci. U.S.A.* **105**, 19792–19796. (doi:10.1073/pnas.0808011105)
- 540 5. Parris MJ, Beaudoin JG. 2004 Chytridiomycosis impacts predator-prey interactions in  
541 larval amphibian communities. *Oecologia* **140**: 626–632. (doi:10.1007/s00442-004-1631-  
542 2)
- 543 6. Agrawal AA. 2001 Phenotypic plasticity in the interactions and evolution of species.  
544 *Science* **294**, 321–326. (doi:10.1126/science.1060701)
- 545 7. Appleton RD, Palmer AR. 1988 Water-borne stimuli released by predatory crabs and  
546 damaged prey induce more predator-resistant shells in a marine gastropod. *Proc. Natl.*  
547 *Acad. Sci.* **85**, 4387–4391. (doi:10.1073/pnas.85.12.4387)
- 548 8. Arnott SA, Barber I, Huntingford FA. 2000 Parasite-associated growth enhancement in a  
549 fish-cestode system. *Proc. R. Soc. B Biol. Sci.* **267**, 657–663.  
550 (doi:10.1098/rspb.2000.1052)
- 551 9. Krumm CE, Conner MM, Hobbs NT, Hunter DO, Miller MW. 2010 Mountain lions prey  
552 selectively on prion-infected mule deer. *Biol. Lett.* **6**, 209–211.  
553 (doi:10.1098/rsbl.2009.0742)
- 554 10. Hudson PJ, Dobson AP, Newborn D. 1992 Do Parasites Make Prey Vulnerable To  
555 Predation - Red Grouse and Parasites. *J. Anim. Ecol.* **61**, 681–692.
- 556 11. Johnson PTJ, Stanton DE, Preu ER, Forshay KJ, Carpenter SR. 2006 Dining on disease:  
557 How interactions between infection and environment affect predation risk. *Ecology* **87**,  
558 1973–1980. (doi:10.1890/0012-9658(2006)87[1973:DODHIB]2.0.CO;2)
- 559 12. Mesa MG, Poe TP, Gadomski DM, Petersen JH. 1994 Are all prey created equal? A  
560 review and synthesis of differential predation on prey in substandard condition. *J. Fish*  
561 *Biol.* **45**, 81–96.
- 562 13. Bradley CA, Altizer S. 2005 Parasites hinder monarch butterfly flight: Implications for  
563 disease spread in migratory hosts. *Ecol. Lett.* **8**, 290–300. (doi:10.1111/j.1461-  
564 0248.2005.00722.x)
- 565 14. Altizer S, Bartel R, Han BA. 2011 Animal migration and infectious disease risk. *Science*  
566 **331**, 296–302. (doi:10.1126/science.1194694)
- 567 15. McKinnon L, Smith PA, Nol E, Martin JL, Doyle FI, Abraham KF, Gilchrist HG,  
568 Morrison RIG, Bêty J. 2010 Lower predation risk for migratory birds at high latitudes.  
569 *Science* **327**, 326–327. (doi:10.1126/science.1183010)
- 570 16. Skov C, Chapman BB, Baktoft H, Brodersen J, Brønmark C, Hansson LA, Hulthén K,

- 1  
2  
3  
4  
5 571 Nilsson PA. 2013 Migration confers survival benefits against avian predators for partially  
6 572 migratory freshwater fish. *Biol. Lett.* **9**, 20121178. (doi:10.1098/rsbl.2012.1178)
- 7 573 17. Mesa MG, Poe TP, Maule AG, Schreck CB. 1998 Vulnerability to predation and  
8 574 physiological stress responses in juvenile chinook salmon (*Oncorhynchus tshawytscha*)  
9 575 experimentally infected with *Renibacterium salmoninarum*. *Can. J. Fish. Aquat. Sci.* **55**,  
10 576 1599–1606. (doi:10.1139/f98-049)
- 11 577 18. Schreck CB, Stahl TP, Davis LE, Roby DD, Clemens BJ. 2006 Mortality Estimates of  
12 578 Juvenile Spring–Summer Chinook Salmon in the Lower Columbia River and Estuary,  
13 579 1992–1998: Evidence for Delayed Mortality? *Transactions of the American Fisheries*  
14 580 *Society* **135**, 457–475. (doi:10.1577/T05-184.1)
- 15 581 19. Hostetter, NJ, Evans AF, Roby DD, Collis K. 2012 Susceptibility of Juvenile Steelhead to  
16 582 Avian Predation: The Influence of Individual Fish Characteristics and River Conditions.  
17 583 *Transactions of the American Fisheries Society* **141**, 1586–99.  
18 584 (<https://doi.org/10.1080/00028487.2012.716011>)
- 19 585 20. Beamesderfer RCP, Ward DL, Nigro AA. 1996 Evaluation of the biological basis for a  
20 586 predator control program on northern squawfish (*Ptychocheilus oregonensis*) in the  
21 587 Columbia and Snake rivers. *Can J Fish Aquat Sci* **53**, 2898-2908.
- 22 588 21. Evans, AF, Hostetter NJ, Roby DD, Collis K, Lyons DE, Sandford BP, Ledgerwood RD,  
23 589 Sebring S. 2012 Systemwide Evaluation of Avian Predation on Juvenile Salmonids from  
24 590 the Columbia River Based on Recoveries of Passive Integrated Transponder Tags.  
25 591 *Transactions of the American Fisheries Society* **141**, 975–89.  
26 592 (<https://doi.org/10.1080/00028487.2012.676809>)
- 27 593 22. Osterback A-MK, Frechette DM, Shelton AO, Hayes SA, Bond MH, Shaffer SA, Moore  
28 594 JW. 2013 High predation on small populations: avian predation on imperiled salmonids.  
29 595 *Ecosphere* **4**, art116. (doi:10.1890/ES13-00100.1)
- 30 596 23. Jeffries KM *et al.* 2014 Immune response genes and pathogen presence predict migration  
31 597 survival in wild salmon smolts. *Mol. Ecol.* **23**, 5803–5815. (doi:10.1111/mec.12980)
- 32 598 24. Evans AF, Hostetter NJ, Collis K, Roby DD, Loge FJ. 2014 Relationship between  
33 599 Juvenile Fish Condition and Survival to Adulthood in Steelhead. *Transactions of the*  
34 600 *American Fisheries Society* **143**, 899–909. (doi:10.1080/00028487.2014.901248)
- 35 601 25. Miller KM *et al.* 2014 Infectious disease, shifting climates, and opportunistic predators:  
36 602 cumulative factors potentially impacting wild salmon declines. *Evol. Appl.* **7**, 812–55.  
37 603 (doi:10.1111/eva.12164)
- 38 604 26. Scott ME. 2010 The Impact of Infection and Disease on Animal Populations: Implications  
39 605 for Conservation Biology. *Conserv. Biol.* **2**, 40–56.
- 40 606 27. Cannon RE, Jeffries KM, Komoroske LM, Todgham AE, Fangue NA. 2018. The utility of  
41 607 transcriptomics in fish conservation. *J. Exper. Biol.* **221**, jeb148833. doi:  
42 608 10.1242/jeb.148833
- 43 609 28. Andres-Terre M, McGuire HM, Pouliot Y, Bongen E, Sweeney TE, Tato CM, Khatri P.  
44 610 2015 Integrated, Multi-cohort Analysis Identifies Conserved Transcriptional Signatures  
45 611 across Multiple Respiratory Viruses. *Immunity* **43**, 1199–1211.  
46 612 (doi:10.1016/j.immuni.2015.11.003)
- 47 613 29. Lu C *et al.* 2011 Novel Biomarkers Distinguishing Active Tuberculosis from Latent  
48 614 Infection Identified by Gene Expression Profile of Peripheral Blood Mononuclear Cells.  
49 615 *PLOS ONE* **6**, e24290. (doi:10.1371/journal.pone.0024290)

- 1  
2  
3  
4  
5 616 30. Zaas AK et al. 2009 Gene Expression Signatures Diagnose Influenza and Other  
6 617 Symptomatic Respiratory Viral Infections in Humans. *Cell Host & Microbe* 6, 207–217.  
7 618 (doi:10.1016/j.chom.2009.07.006)  
8 619 31. Chen L, Borozan I, Feld J, Sun J, Tannis L-L, Coltescu C, Heathcote J, Edwards AM,  
9 620 McGilvray ID. 2005 Hepatic Gene Expression Discriminates Responders and  
10 621 Nonresponders in Treatment of Chronic Hepatitis C Viral Infection. *Gastroenterology*  
11 622 128, 1437–1444. (doi:10.1053/j.gastro.2005.01.059)  
12 623 32. Miller KM, Günther OP, Li S, Kaukinen KH, Ming TJ. 2017 Molecular indices of viral  
13 624 disease development in wild migrating salmon. *Conserv. Physiol.* 5.  
14 625 (doi:10.1093/conphys/cox036)  
15 626 33. Di Cicco E, Ferguson HW, Kaukinen KH, Schulze AD, Li S, Tabata A, Günther OP,  
16 627 Mordecai G, Suttle CA, Miller KM. 2018. The same strain of Piscine orthoreovirus (PRV-  
17 628 1) is involved in the development of different, but related, diseases in Atlantic and Pacific  
18 629 Salmon in British Columbia. *Facets* 3:599-641.  
19 630 34. Mordecai GJ et al. 2019 Endangered wild salmon infected by newly discovered viruses.  
20 631 *eLife* 8, e47615. (doi:10.7554/eLife.47615)  
21 632 35. Mordecai GJ et al. In press. Discovery and surveillance of viruses from salmon in British  
22 633 Columbia using viral immune-response biomarkers, metatranscriptomics and high-  
23 634 throughput RT-PCR. *Virus Evol* (doi:10.1093/ve/veaa069)  
24 635 36. Furey NB, Hinch SG, Mesa MG, Beauchamp DA. 2016 Piscivorous fish exhibit  
25 636 temperature-influenced binge feeding during an annual prey pulse. *J. Anim. Ecol.* 85,  
26 637 1307-1317. (doi:10.1111/1365-2656.12565)  
27 638 37. Clark TD et al. 2016 Tracking wild sockeye salmon smolts to the ocean reveals distinct  
28 639 regions of nocturnal movement and high mortality. *Ecol. Appl.* 26, 959-978.  
29 640 (doi:10.14286/2015CLARKTCHILKO)  
30 641 38. Dixon P, Paley R, Alegria-Moran R, Oidtmann B. 2016 Epidemiological characteristics of  
31 642 infectious hematopoietic necrosis virus (IHNV): a review. *Vet Res* 47, 63.  
32 643 (doi:10.1186/s13567-016-0341-1)  
33 644 39. Miller K, Traxler G, Kaukinen K, Li S, Richard J, Ginther N. 2007 Salmonid host  
34 645 response to infectious hematopoietic necrosis (IHN) virus: Cellular receptors, viral  
35 646 control, and novel pathways of defence. *Aquaculture* 272, 217–237.  
36 647 (doi:10.1016/j.aquaculture.2007.08.041)  
37 648 40. Lapatra S. 1998 Factors affecting pathogenicity of infectious hematopoietic necrosis virus  
38 649 (IHNV) for salmonid fish. *J. Aquat. Anim. Health* 10, 121–131. (doi:10.1577/1548-  
39 650 8667(1998)010<0121>  
40 651 41. Williams I V, Amend DF. 1976 A natural epizootic of infectious hematopoietic necrosis  
41 652 in fry of sockeye salmon (*Oncorhynchus nerka*) at Chilko Lake, British Columbia. *J. Fish.*  
42 653 *Res. Board Canada* 33, 1564–1567.  
43 654 42. Furey NB, Hinch SG, Lotto AG, Beauchamp DA. 2015 Extensive Feeding on Sockeye  
44 655 Salmon *Oncorhynchus Nerka* Smolts by Bull Trout *Salvelinus Confluentus* during Initial  
45 656 Outmigration into a Small, Unregulated and Inland British Columbia River. *Journal of*  
46 657 *Fish Biology* 86, 392–401. (<https://doi.org/10.1111/jfb.12567>)  
47 658 43. Miller KM, Li S, Kaukinen KH, Ginther N, Hammill E, Curtis JM, Patterson DA,  
48 659 Sierocinski T, Donnison L, Pavlidis P, Hinch SG. 2011. Genomic signatures predict  
49 660 migration and spawning failure in wild Canadian salmon. *Science* 331(6014):214-217.

- 1  
2  
3  
4  
5 661 44. R Core Team. 2018. R: A language and environment for statistical computing. R  
6 662 Foundation for Statistical Computing, Vienna, Austria. URL <https://www.R-project.org/>  
7 663 45. Oksanen J, Guillaume Blanchet F, Friendly M, Kindt R, Legendre P, McGlinn D, Minchin  
8 664 PR, O'Hara RB, Simpson, GL, Solymos, P, Stevens MHH, Szoecs E, Wagner H. 2019.  
9 665 vegan: Community Ecology Package. R package version 2.5-6. [https://CRAN.R-](https://CRAN.R-project.org/package=vegan)  
10 666 [project.org/package=vegan](https://CRAN.R-project.org/package=vegan)  
11 667 46. Irvine JR, Akenhead SA. 2013 Understanding Smolt Survival Trends in Sockeye Salmon.  
12 668 *Marine and Coastal Fisheries* **5**, 303–328. (doi:10.1080/19425120.2013.831002)  
13 669 47. Barton, K. 2019 MuMIn: Multi-Model Inference. R package version 1.43.6.  
14 670 <https://CRAN.R-project.org/package=MuMIn>  
15 671 48. Hudson PJ, Dobson AP, Newborn D. 1992 Do Parasites make Prey Vulnerable to  
16 672 Predation? Red Grouse and Parasites. *J. Anim. Ecol.* **61**, 681–692. (doi:10.2307/5623)  
17 673 49. Genovart M, Negre N, Tavecchia G, Bistuer A, Parpal L, Oro D. 2010 The Young, the  
18 674 Weak and the Sick: Evidence of Natural Selection by Predation. *PLOS ONE* **5**, e9774.  
19 675 (doi:10.1371/journal.pone.0009774)  
20 676 50. Bootland LM, Leong J-AC. 1999 Infectious haematopoietic necrosis virus. In *Fish*  
21 677 *Diseases and Disorders* (eds P Woo, J Leatherland, D Bruno), pp. 66–109.  
22 678 51. Kim CH, Dummer DM, Chiou PP, Leong JA. 1999 Truncated particles produced in fish  
23 679 surviving infectious hematopoietic necrosis virus infection: mediators of persistence? *J.*  
24 680 *Virol.* **73**, 843–9.  
25 681 52. LaPatra SE, Barone L, Jones GR, Zon LI. 2000 Effects of Infectious Hematopoietic  
26 682 Necrosis Virus and Infectious Pancreatic Necrosis Virus Infection on Hematopoietic  
27 683 Precursors of the Zebrafish. *Blood Cells, Molecules, and Diseases* **26**, 445–452.  
28 684 (doi:10.1006/bcmd.2000.0320)  
29 685 53. Munday BL, Kwang J, Moody N. 2002 Betanodavirus infections of teleost fish: a review.  
30 686 *J. Fish Dis.* **25**, 127–142.  
31 687 54. Tierney KB, Farrell AP. 2004 The relationships between fish health, metabolic rate,  
32 688 swimming performance and recovery in return-run sockeye salmon, *Oncorhynchus nerka*  
33 689 (Walbaum). *J. Fish Dis.* **27**, 663–671. (doi:10.1111/j.1365-2761.2004.00590.x)  
34 690 55. Binning SA, Shaw AK, Roche DG. 2017 Parasites and Host Performance: Incorporating  
35 691 Infection into Our Understanding of Animal Movement. *Integr Comp Biol* **57**, 267–280.  
36 692 (doi:10.1093/icb/icx024)  
37 693 56. Xu D-H, Klesius PH, Peatman E, Liu Z. 2011 Susceptibility of channel catfish, blue catfish  
38 694 and channel×blue catfish hybrid to *Ichthyophthirius multifiliis*. *Aquaculture* **311**, 25–30.  
39 695 (doi:10.1016/j.aquaculture.2010.10.012)  
40 696 57. Dickerson, HW. 2011. *Ichthyophthirius multifiliis*. In Woo, P. T., & Buchmann, K. (Eds.).  
41 697 (2011). *Fish parasites: pathobiology and protection*. CABI.  
42 698 58. Traxler GS, Richard J, McDonald TE. 1998 *Ichthyophthirius multifiliis* (Ich) Epizootics in  
43 699 Spawning Sockeye Salmon in British Columbia, Canada. *Journal of Aquatic Animal Health*  
44 700 **10**, 143–151. (doi:10.1577/1548-8667(1998)010<0143:IMIEIS>2.0.CO;2)  
45 701 59. Münderle M, Sures B, Taraschewski H. 2004 Influence of *Anguillicola crassus* (Nematoda)  
46 702 and *Ichthyophthirius multifiliis* (Ciliophora) on swimming activity of European eel *Anguilla*  
47 703 *anguilla*. *Diseases of Aquatic Organisms* **60**, 133–139. (doi:10.3354/dao060133)

- 1  
2  
3  
4  
5 704 60. Maceda-Veiga A, Salvadó H, Vinyoles D, Sostoa AD. 2009 Outbreaks of *Ichthyophthirius*  
6 705 *multifiliis* in Redtail Barbs *Barbus haasi* in a Mediterranean Stream during Drought. *Journal*  
7 706 *of Aquatic Animal Health* 21, 189–194. (doi:10.1577/H08-054.1)  
8 707 61. Healy SJ, Hinch SG, Bass AL, Furey NB, Welch DW, Rechisky EL, Eliason EJ, Lotto AG,  
9 708 Miller KM. 2018 Transcriptome profiles relate to migration fate in hatchery steelhead  
10 709 (*Oncorhynchus mykiss*) smolts. *Canadian Journal of Fisheries and Aquatic Sciences*  
11 710 (doi:10.1139/cjfas-2017-0424)  
12 711 62. Teffer AK, Bass AL, Miller KM, Patterson DA, Juanes F, Hinch SG. 2018 Infections,  
13 712 fisheries capture, temperature, and host responses: multistressor influences on survival and  
14 713 behaviour of adult Chinook salmon. *Canadian Journal of Fisheries and Aquatic Sciences*  
15 714 (doi:10.1139/cjfas-2017-0491)  
16 715 63. Bass, A.L., Hinch, S.G., Teffer, A.K., Patterson, D.A. and Miller, K.M., 2019. Fisheries  
17 716 capture and infectious agents are associated with travel rate and survival of Chinook  
18 717 salmon during spawning migration. *Fish. Res.* **209**, 156-166.  
19 718 64. Stevenson CF, Bass AL, Furey NB, Miller KM, Li S, Rechisky EL, Porter AD, Welch  
20 719 DW, Hinch SG. 2019 Infectious agents and gene expression differ between sockeye  
21 720 salmon (*Oncorhynchus nerka*) smolt age classes but do not predict migration survival.  
22 721 *Can. J. Fish. Aquat. Sci.* (doi: 10.1139/cjfas-2019-0113)  
23 722 65. Gunnarsson GS, Karlsbakk E, Blindheim S, Plarre H, Imsland AK, Handeland S, Sveier H,  
24 723 Nylund A. 2017 Temporal changes in infections with some pathogens associated with gill  
25 724 disease in farmed Atlantic salmon (*Salmo salar* L). *Aquaculture* 468, 126–134.  
26 725 (doi:10.1016/j.aquaculture.2016.10.011)  
27 726 66. Bartholomew JL. 1998 Host Resistance to Infection by the Myxosporean Parasite  
28 727 *Ceratomyxa shasta*: A Review. *Journal of Aquatic Animal Health* 10, 112–120.  
29 728 (doi:10.1577/1548-8667(1998)010<0112:HRTIBT>2.0.CO;2)  
30 729 67. Kotob MH, Menanteau-Ledouble S, Kumar G, Abdelzaher M, El-Matbouli M. 2016 The  
31 730 impact of co-infections on fish: a review. *Vet. Res.* **47**, 1–12. (doi:10.1186/s13567-016-  
32 731 0383-4)  
33 732 68. Bordes F, Morand S. 2011 The impact of multiple infections on wild animal hosts: a  
34 733 review. *Infect. Ecol. Epidemiol.* **1**, 7346. (doi:10.3402/iee.v1i0.7346)  
35 734 69. Lello J, Boag B, Fenton A, Stevenson IR, Hudson PJ. 2004 Competition and mutualism  
36 735 among the gut helminths of a mammalian host. *Nature* **428**, 840–844.  
37 736 (doi:10.1038/nature02490)  
38 737 70. Natsopoulou ME, McMahan DP, Doublet V, Bryden J, Paxton RJ. 2015 Interspecific  
39 738 competition in honeybee intracellular gut parasites is asymmetric and favours the spread  
40 739 of an emerging infectious disease. *Proceedings of the Royal Society B: Biological*  
41 740 *Sciences* **282**, 20141896. (doi:10.1098/rspb.2014.1896)  
42 741 71. Telfer S, Lambin X, Birtles R, Beldomenico P, Burthe S, Paterson S, Begon M. 2010  
43 742 Species Interactions in a Parasite Community Drive Infection Risk in a Wildlife  
44 743 Population. *Science* **330**, 243–246. (doi:10.1126/science.1190333)  
45 744 72. Evans AF et al. 2016 Avian Predation on Juvenile Salmonids: Spatial and Temporal Analysis  
46 745 Based on Acoustic and Passive Integrated Transponder Tags. *Trans. Am. Fish. Soc.* 145,  
47 746 860–877. (doi:10.1080/00028487.2016.1150881)  
48 747 73. Wood CC. 1987 Predation of Juvenile Pacific Salmon by the Common Merganser (*Mergus*  
49 748 *merganser*) on Eastern Vancouver Island. I: Predation during the Seaward Migration. *Can.*



- 1  
2  
3  
4  
5 749 *J. Fish. Aquat. Sci.* (doi:10.1139/f87-112)
- 6 750 74. Kekäläinen J, Niva T, Huuskonen H. 2008 Pike predation on hatchery-reared Atlantic salmon  
7 751 smolts in a northern Baltic river. *Ecol. Fresh. Fish* 17, 100–109. (doi:10.1111/j.1600-  
8 752 0633.2007.00263.x)
- 9 753 75. Zimmerman MP, Ward DL. 1999 Index of Predation on Juvenile Salmonids by Northern  
10 754 Pikeminnow in the Lower Columbia River Basin, 1994–1996. *Trans Am. Fish. Soc.* 128,  
11 755 995–1007. (doi:10.1577/1548-8659(1999)128<0995:IOPOJS>2.0.CO;2)
- 12 756 76. Tucker, S., Mark Hipfner, J. and Trudel, M., 2016. Size-and condition-dependent predation:  
13 757 a seabird disproportionately targets substandard individual juvenile salmon. *Ecol.* 97(2), 461-  
14 758 471.
- 15 759 77. LaPatra S, Rohovec J, Fryer J. 1989 Detection of Infectious Hematopoietic Necrosis Virus  
16 760 in fish mucus. *Fish Pathol.* 24, 197–202.
- 17 761 78. Koelz HR. 1992 Gastric acid in vertebrates. *Scand. J. Gastroenterol.* 27(S193): 2–6.  
18 762 doi:10.3109/00365529209095998.
- 19 763 79. Tennant SM, Hartland EL, Phumoonna T, Lyras D, Rood JI, Robins-Browne RM, Van  
20 764 Driel IR. 2008 Influence of gastric acid on susceptibility to infection with ingested bacterial  
21 765 pathogens. *Infect. Immun.* 76, 639–645. (doi:10.1128/IAI.01138-07)
- 22 766 80. Follett JE, Meyers TR, Burton TO, Geesin JL. 1997 Comparative susceptibilities of  
23 767 salmonid species in alaska to infectious hematopoietic necrosis virus (IHNV) and north  
24 768 American viral hemorrhagic septicemia virus (VHSV). *J. Aquat. Anim. Health* 9, 34–40.  
25 769 (doi:10.1577/1548-8667(1997)009<0034:CSOSSI>2.3.CO;2)
- 26 770 81. Nelson MC. 2012 What Happened to Bull Trout in Lake Chelan? An Examination of the  
27 771 Historical Evidence. US Fish and Wildlife Service, Leavenworth, WA, USA. 40 p.
- 28 772 82. Skall, HF, Olesen, NJ, Mellergaard S. 2005 Viral haemorrhagic septicaemia virus in marine  
29 773 fish and its implications for fish farming - A review. *J. Fish Dis.* 28(9): 509–529.  
30 774 doi:10.1111/j.1365-2761.2005.00654.x.
- 31 775 83. Goodwin AE, Peterson JE, Meyers TR, Money DJ. 2004 Transmission of Exotic Fish  
32 776 Viruses: The Relative Risks of Wild and Cultured Bait. *Fisheries* 29(5): 19–23.
- 33 777 84. Sogard, S.M. 1997. Size-selective mortality in the juvenile stage of teleost fishes: A review.  
34 778 *Bull. Mar. Sci.* 60, 1129–1157.
- 35 779 85. Di Cicco, E., Ferguson, H.W., Kaukinen, K.H., Schulze, A.D., Li, S., Tabata, A., Günther,  
36 780 O.P., Mordecai, G., Suttle, C.A., and Miller, K.M. 2018. The same strain of Piscine  
37 781 orthoreovirus (PRV-1) is involved in the development of different, but related, diseases in  
38 782 Atlantic and Pacific Salmon in British Columbia. *FACETS* 3(1): 599–641.  
39 783 doi:10.1139/facets-2018-0008.
- 40 784 86. Pozhitkov AE, Neme R, Domazet-Lošo T, Leroux BG, Soni S, Tautz D, Noble PA. 2017  
41 785 Tracing the dynamics of gene transcripts after organismal death. *Open Biol* 7, 160267.
- 42 786 87. Ferreira PG, Muñoz-Aguirre M, Reverter F, Godinho CPS, Sousa A, Amadoz A, Sodaei R,  
43 787 Hidalgo MR, Pervouchine D, Carbonell-Caballero J, Nurtdinov R. 2018 The effects of  
44 788 death and post-mortem cold ischemia on human tissue transcriptomes. *Nat. Comm.* 9, 490.
- 45 789 88. Lennox, R.J., Gallagher, A.J., Ritchie, E.G. and Cooke, S.J., 2018. Evaluating the efficacy  
46 790 of predator removal in a conflict-prone world. *Biol Cons.* 224, 277-289.
- 47 791 89. Packer C, Holt RD, Hudson PJ, Lafferty KD, Dobson AP. 2003 Keeping the herds healthy  
48 792 and alert: Implications of predator control for infectious disease. *Ecol. Lett.* 6, 797–802.  
49 793 (doi:10.1046/j.1461-0248.2003.00500.x)

- 1  
2  
3  
4  
5 794 90. Karvonen A, Rintamäki P, Jokela J, Valtonen ET. 2010 Increasing water temperature and  
6 795 disease risks in aquatic systems: Climate change increases the risk of some, but not all,  
7 796 diseases. *International Journal for Parasitology* **40**, 1483–1488.  
8 797 (doi:10.1016/j.ijpara.2010.04.015)  
9 798 91. Marcos-López M, Gale P, Oidtmann BC, Peeler EJ. 2010 Assessing the Impact of Climate  
10 799 Change on Disease Emergence in Freshwater Fish in the United Kingdom. *Transboundary*  
11 800 *and Emerging Diseases* **57**, 293–304. (doi:10.1111/j.1865-1682.2010.01150.x)  
12 801 92. Furey NB, Bass AL, Miller KM, Li S, Lotto AG, Healy SJ, Drenner SM, Hinch SG. 2020  
13 802 Electronic Supplementary Materials for: "Infected juvenile salmon can experience increased  
14 803 predation during freshwater migration". Dryad doi:10.5061/dryad.12jm63xw2)  
15 804  
16  
17  
18  
19  
20  
21  
22  
23  
24  
25  
26  
27  
28  
29  
30  
31  
32  
33  
34  
35  
36  
37  
38  
39  
40  
41  
42  
43  
44  
45  
46  
47  
48  
49  
50  
51  
52  
53  
54  
55  
56  
57  
58  
59  
60

## Tables

**Table 1:** List of infectious agents assessed in sockeye salmon smolts using qRT-PCR, the percentage of positives recorded across year-tissue combinations ( $\pm$ SE), and the odds-ratio of each infectious agent being found in a predated smolt over a non-predated smolt are given. Odds ratios in bold and noted with an asterisk(\*) indicate significant Fisher exact test (fdr-corrected  $P < 0.05$ ). Sample sizes are as follows for each year-tissue combination: 2014 predated (n = 32 for gills, n = 31 for livers); 2014 not predated (n = 30 each tissue); 2015 predated (n = 30 each tissue); 2015 not predated (n = 9 each tissue). Prevalence rates assessed from mixed-tissue samples of Chilko sockeye salmon smolts collected via the Strategic Salmon Health Initiative (SSHI) are given for 2012 (n = 54 – 56 smolts for each assay), 2013 (n = 85 – 89), and 2014 (n = 21 – 30) for comparison

| Infectious agent                                              | Assay name | Agent                | Percent positives (predated / not predated) |                                       |                                       |                                       | odds-ratio (predated over not predated) |                       |                      |                       | Prevalence (SSHI samples) |      |      |
|---------------------------------------------------------------|------------|----------------------|---------------------------------------------|---------------------------------------|---------------------------------------|---------------------------------------|-----------------------------------------|-----------------------|----------------------|-----------------------|---------------------------|------|------|
|                                                               |            |                      | 2014 gill positives                         | 2014 liver positives                  | 2015 gill positives                   | 2015 liver positives                  | 2014 gill odds-ratio                    | 2014 liver odds-ratio | 2015 gill odds-ratio | 2015 liver odds-ratio | 2012                      | 2013 | 2014 |
| <i>Candidatus</i><br><i>Branchiomonas</i><br><i>cysticola</i> | c_b_cys    | Bacteria             | 100( $\pm$ 0.0)<br>/100( $\pm$ 0.0)         | 96.8( $\pm$ 3.2)<br>/93.3(4.6 $\pm$ ) | 100( $\pm$ 0.0)<br>/100( $\pm$ 0.0)   | 66.7( $\pm$ 9.1)<br>/100( $\pm$ 0.0)  | 2.1                                     |                       |                      | 0.0                   | 98.2                      | 100  | 100  |
| <i>Ceratomyxa shasta</i>                                      | ce_sha     | Myxozoan             |                                             |                                       |                                       |                                       |                                         |                       |                      |                       | 0.0                       | 0.0  | 0.0  |
| <i>Dermocystidium salmonis</i>                                | de_sal     | Fungus/<br>Protozoan |                                             |                                       |                                       |                                       |                                         |                       |                      |                       | 1.8                       | 0.0  | 0.0  |
| <i>Flavobacterium psychrophilum</i>                           | fl_psy     | Bacteria             | 87.5( $\pm$ 5.8)<br>/70( $\pm$ 8.4)         | 16.1( $\pm$ 6.6)<br>/10( $\pm$ 5.6)   | 76.7( $\pm$ 7.7)<br>/44.4( $\pm$ 5.0) | 14.8( $\pm$ 6.8)<br>/11.1( $\pm$ 6.4) | 2.9                                     | 1.7                   | 3.9                  | 1.4                   | 5.4                       | 6.7  | 17.2 |
| <i>Candidatus</i>                                             | sch        | Bacteria             |                                             |                                       |                                       |                                       |                                         |                       |                      |                       | 0.0                       | 0.0  | 0.0  |

|    |                         |           |            |              |               |               |              |              |              |     |      |      |      |
|----|-------------------------|-----------|------------|--------------|---------------|---------------|--------------|--------------|--------------|-----|------|------|------|
| 1  |                         |           |            |              |               |               |              |              |              |     |      |      |      |
| 2  |                         |           |            |              |               |               |              |              |              |     |      |      |      |
| 3  |                         |           |            |              |               |               |              |              |              |     |      |      |      |
| 4  |                         |           |            |              |               |               |              |              |              |     |      |      |      |
| 5  | Syngnamydia             |           |            |              |               |               |              |              |              |     |      |      |      |
| 6  | salmonis                |           |            |              |               |               |              |              |              |     |      |      |      |
| 7  | <i>Ichthyophthirius</i> | ic_mul    | Ciliate    | 28.1(±7.9    |               | 16.7(±6.8     | 7.4(±5.0)/   | 5.3          |              |     | 3.6  | 20.0 | 23.1 |
| 8  | <i>multifiliis</i>      |           |            | ) / 6.7(±4.6 |               | ) / 0.0(±0.0  | 0.0(±0.0)    |              |              |     |      |      |      |
| 9  |                         |           |            | )            |               | )             |              |              |              |     |      |      |      |
| 10 | Infectious              | ihnv      | Virus      | 87.5(±5.8    | 35.5(±8.6)    |               |              | <b>25.8*</b> | <b>15.3*</b> |     | 0.0  | 0.0  | 3.3  |
| 11 | hematopoietic           |           |            | ) / 20(±7.3  | ) / 3.3(±4.0) |               |              |              |              |     |      |      |      |
| 12 | necrosis virus          |           |            | )            |               |               |              |              |              |     |      |      |      |
| 13 | <i>Loma salmonae</i>    | lo_sal    | Microspori |              |               |               |              |              |              |     | 0.0  | 0.0  | 0.0  |
| 14 | ( <i>Loma Spp</i> )     |           | dium       |              |               |               |              |              |              |     |      |      |      |
| 15 | Pacific salmon          | pspv      | Virus      | 9.4(±5.2)/   | 80.6(±7.1)    | 10(±5.5)/     | 48.1(±9.6    | 2.1          | 0.9          | 3.2 | 78.6 | 96.6 | 93.3 |
| 16 | parvovirus              |           |            | 0.0(±0.0)    | ) / 66.7(±9.2 | ) / 11.1(±5.9 | ) / 22.2(10. |              |              |     |      |      |      |
| 17 |                         |           |            | )            | )             | )             | 4±)          |              |              |     |      |      |      |
| 18 | <i>Paranucleospora</i>  | pa_ther   | Microspori |              |               |               |              |              |              |     | 0.0  | 1.1  | 0.0  |
| 19 | <i>theridion</i>        |           | dium       |              |               |               |              |              |              |     |      |      |      |
| 20 | <i>Parvicapsula</i>     | pa_min    | Myxozoan   |              |               |               | 0.0(±0.0)/   |              |              |     | 0.0  | 1.1  | 0.0  |
| 21 | <i>minibicornis</i>     |           |            |              |               |               | 11.1(±5.9    |              |              |     |      |      |      |
| 22 |                         |           |            |              |               |               | )            |              |              |     |      |      |      |
| 23 | <i>Parvicapsula</i>     | pa_pse    | Myxozoan   |              |               |               |              |              |              |     | 0.0  | 0.0  | 0.0  |
| 24 | <i>pseudobranchic</i>   |           |            |              |               |               |              |              |              |     |      |      |      |
| 25 | <i>ola</i>              |           |            |              |               |               |              |              |              |     |      |      |      |
| 26 | <i>Piscichlamydia</i>   | pch_sal   | Bacteria   | 15.6(±6.4    | 3.2(±3.2)/    |               |              |              |              |     | 0.0  | 0.0  | 0.0  |
| 27 | <i>salmonis</i>         |           |            | ) / 0.0(±0.0 | ) / 0.0(±0.0) |               |              |              |              |     |      |      |      |
| 28 |                         |           |            | )            |               |               |              |              |              |     |      |      |      |
| 29 | Piscine reovirus        | prv       | Virus      |              |               |               |              |              |              |     | 0.0  | 0.0  | 0.0  |
| 30 | <i>Tetracapsuloides</i> | te_bry    | Myxozoan   |              | 6.5(±4.4)/    |               |              |              |              |     | 0.0  | 3.4  | 16.7 |
| 31 | <i>bryosalmonae</i>     |           |            |              | 0.0(±0.0)     |               |              |              |              |     |      |      |      |
| 32 | Ricksettia-like         | rlo       |            | 3.1(±3.1)/   |               |               |              |              |              |     | 0.0  | 1.1  | 0.0  |
| 33 | organism                |           |            | 0.0(±0.0)    |               |               |              |              |              |     |      |      |      |
| 34 | <i>Yersinia ruckeri</i> | ye_ruc_gl | Bacteria   | 9.4(±5.2)/   |               | 13.3(±6.2     |              |              |              |     | 0.0  | 0.0  | 0.0  |
| 35 |                         | nA        |            | 0.0(±0.0)    |               | ) / 0.0(±0.0  |              |              |              |     |      |      |      |
| 36 |                         |           |            |              |               | )             |              |              |              |     |      |      |      |
| 37 |                         |           |            |              |               |               |              |              |              |     |      |      |      |
| 38 |                         |           |            |              |               |               |              |              |              |     |      |      |      |
| 39 |                         |           |            |              |               |               |              |              |              |     |      |      |      |
| 40 |                         |           |            |              |               |               |              |              |              |     |      |      |      |
| 41 |                         |           |            |              |               |               |              |              |              |     |      |      |      |
| 42 |                         |           |            |              |               |               |              |              |              |     |      |      |      |
| 43 |                         |           |            |              |               |               |              |              |              |     |      |      |      |
| 44 |                         |           |            |              |               |               |              |              |              |     |      |      |      |
| 45 |                         |           |            |              |               |               |              |              |              |     |      |      |      |
| 46 |                         |           |            |              |               |               |              |              |              |     |      |      |      |
| 47 |                         |           |            |              |               |               |              |              |              |     |      |      |      |

805 **Table 2:** Summary of generalized linear models (GLMs) describing relationships  
 806 between predation status (binomial) and the presence of infectious agents and fork length  
 807 (FL). Candidate models are ranked by AICc, and only models with  $\Delta\text{AICc} < 3$  are shown.  
 808 The top-ranked model is in bold. First numeric value given for each model is the  
 809 intercept, and coefficients are shown for each explanatory variable. Infectious agents are  
 810 labelled as per their assay name (Table 1). Positive coefficients indicate increased  
 811 probability of predation (negative coefficients associated with reduced predation risk).

| 2014 - Gill                                                |             |                     |  |
|------------------------------------------------------------|-------------|---------------------|--|
| Model                                                      | AICc        | $\Delta\text{AICc}$ |  |
| <b>~ -2.54 + ihnv(+3.64) + ic_mul(+2.20)</b>               | <b>46.6</b> | <b>0</b>            |  |
| ~ -1.75 + ihnv (+4.53) + ic_mul(+2.44) + fl_psy(-1.70)     | 47.4        | 0.8                 |  |
| ~ -2.54 + ihnv(+3.49) + ic_mul(+2.20) + pch_sal(+16.14)    | 47.7        | 1.04                |  |
| ~ -2.56 + ihnv(+3.51) + ic_mul(+2.25) + pspv(+16.61)       | 47.7        | 1.12                |  |
| ~ -2.08 + ihnv(+3.52)                                      | 48.5        | 1.91                |  |
| ~ +1.63 + FL(-0.04) + ihnv(+3.60) + ic_mul(+2.07)          | 48.6        | 1.95                |  |
| ~ -2.08 + ihnv(+3.36) + pch_sal(+16.29)                    | 49.4        | 2.79                |  |
| ~ -1.39 + ihnv(+4.21) + fl_psy(-1.39)                      | 49.6        | 2.94                |  |
| 2014 - Liver                                               |             |                     |  |
| Model                                                      | AICc        | $\Delta\text{AICc}$ |  |
| <b>~ +12.29 + FL(-0.14) + ihnv(+3.56)</b>                  | <b>61.1</b> | <b>0</b>            |  |
| ~ -4.12 + FL(-0.14) + ihnv(+3.50) + cb_cys(+16.64)         | 62          | 0.91                |  |
| ~ +12.22 + FL(-0.14) + ihnv(+3.55) + pspv(+0.16)           | 63.3        | 2.29                |  |
| ~ +12.31 + FL(-0.14) + ihnv(+3.57) + fl_psy(-0.15)         | 63.4        | 2.32                |  |
| 2015 - Gill                                                |             |                     |  |
| Model                                                      | AICc        | $\Delta\text{AICc}$ |  |
| <b>~ +22.21 + FL(-0.27) + ic_mul(+18.63)</b>               | <b>31</b>   | <b>0</b>            |  |
| ~ +22.56 + FL(-0.29) + ic_mul(+17.77) + fl_psy(+1.66)      | 31.2        | 0.19                |  |
| ~ +23.11 + FL(-0.29) + ic_mul(+19.91) + ye_ruc_gIA(+18.88) | 31.3        | 0.35                |  |
| ~ +22.35 + FL(-0.28) + fl_psy(+2.38)                       | 31.4        | 0.39                |  |
| ~ +22.10 + FL(-0.27) + fl_psy(+2.25) + ye_ruc_gIA(+16.74)  | 33          | 2.08                |  |
| ~ +24.52 + FL(-0.31) + fl_psy(+2.66) + pspv(-1.10)         | 33.4        | 2.47                |  |
| ~ +22.36 + FL(-0.28) + ic_mul(18.71) + pspv(+0.43)         | 33.5        | 2.5                 |  |
| 2015 - Liver                                               |             |                     |  |

| Model                                                                              | AICc        | $\Delta$ AICc |
|------------------------------------------------------------------------------------|-------------|---------------|
| $\sim +39.19 + \text{FL}(-0.25) + \text{cb\_cys}(-19.14) + \text{ic\_mul}(+20.09)$ | <b>29.3</b> | <b>0</b>      |
| $\sim +35.77 + \text{FL}(-0.21) + \text{cb\_cys}(-18.84)$                          | 29.8        | 0.57          |
| $\sim +36.07 + \text{FL}(-0.22) + \text{cb\_cys}(-18.61) + \text{pspv}(+1.35)$     | 31.1        | 1.78          |

812

1  
2  
3  
4  
5 814 **Figure Legends**  
6

7 815  
8

9  
10 816 **Figure 1** Shannon diversity index of infectious agents found in gill and liver tissue of  
11  
12 817 sockeye salmon smolts between those predated and not predated by bull trout. Asterisks  
13  
14 818 indicate a significant difference in median pathogen richness between predated and non-  
15  
16 819 predated groups (Mann Whitney U-test,  $\alpha = 0.05$ ).  
17  
18

19 820  
20

21 821 **Figure 2** PCA of gene expression of 13 genes used in diagnosing viral disease  
22  
23 822 development [40] in sockeye salmon smolt samples from 2014 and 2015 and in gill and  
24  
25 823 liver tissues. Circle size symbolizes IHNv loads (represented as the log of the estimated  
26  
27 824 copy number + 1). Red ellipses enclose the same samples (three in liver samples, with an  
28  
29 825 additional fourth in gill samples) that separate via the first PC axis and have high IHNv  
30  
31 826 loads (IHNv+), potentially indicative of an active disease state. Percentages in  
32  
33 827 parentheses indicate the percent variability explained among gene expression by that  
34  
35 828 specific axis.  
36  
37

38 829  
39  
40

41  
42 830 **Figure 3:** Expression levels (via cycle threshold [Ct] values) of three reference genes  
43  
44 831 between years and tissues of juvenile sockeye salmon smolts. “Predated” indicates  
45  
46 832 predated samples, “Not” indicates control, or non-predated, sample. Asterisk (\*) indicates  
47  
48 833 significant difference in Ct score between predated and non-predated samples for a given  
49  
50 834 reference gene (t-test,  $\alpha = 0.05$ ).  
51  
52

53 835  
54

55 836  
56  
57  
58  
59  
60

1  
2  
3 Associate Editor Comments to Author:  
4

5 Given that the authors seem to have tried hard to improve the paper but one of the reviewers still has  
6 some concerns, it is fair to offer the authors a final opportunity to revise, but they should be aware this  
7 is the final opportunity they will have.  
8

9  
10 ***Response: Thank you, and we appreciate that our hard work has been evident. We understand that***  
11 ***this is our final opportunity, and hope the reviewer appreciates the lengths we went to meet their***  
12 ***demands. We also hope the Associate Editor and reviewer can appreciate the value of this story – that***  
13 ***even with a complicated system and limited sample size, we were able to observe this link between***  
14 ***infection and predation. Regardless, we appreciate the efforts of all of the reviewers that have been***  
15 ***involved with this manuscript.***  
16

17  
18 ***All line numbers referred to in our response below correspond to the track-changes document (rather***  
19 ***than the “clean” version).***  
20

21  
22  
23 Reviewer comments to Author:  
24

25 Reviewer: 2

26 Comments to the Author(s)  
27

28  
29 Comment #1: In general, Furey et al. did a good job addressing my comments, especially in the  
30 introduction. I still have some large concerns with the analysis, that I believe the authors can address  
31 relatively quickly, if given the opportunity. I also have some concerns that the authors tend to oversell  
32 their results in the discussion. Specifically, the results show that the only disease that appeared to  
33 increase the susceptibility to predation was IHNv, which was only present in one year. In contrast, other  
34 diseases that appeared to be much more prevalent, did not increase predation rates. However, the  
35 authors did not mention this dichotomy in the discussion at all. I think this is a major oversight that can  
36 have some major implications. I recommend the authors temper their conclusions in the discussion to  
37 better represent that they only found that one disease increased predation rates, while other diseases  
38 appeared to have minimal effect.  
39

40 Perhaps there are differences in these diseases and the way that they influence fish behavior that  
41 influence the fish's susceptibility to predation.  
42

43  
44 ***Response #1: We appreciate the reviewer felt that overall, we did a good job in addressing their***  
45 ***comments. Focusing on IHNv's impacts to us is not “overselling” the results relative to the pathogens***  
46 ***that are not linked to mortality, but rather we focus on this result because it is so striking (and makes***  
47 ***sense, given the literature on this infectious agent). Rather than temper our conclusions, we instead***  
48 ***add text to the Discussion that clearly recognizes that most infectious agents did not result in***  
49 ***increased predation risk, which is expected (L359-367); we agree this is an important addition that we***  
50 ***overlooked. Please note that infection does not equate into disease (all of us, and animals, have***  
51 ***several infectious agents in our systems, but disease is only experienced at specific agent-load levels).***  
52 ***So our results demonstrate that most infections we saw did not result in increased predation risk,***  
53 ***rather than disease. We also add text in the Discussion (L338-358) to place some of the new results***  
54  
55  
56  
57  
58  
59  
60



1  
2  
3 ***(see response to comments below) in context, including increased discussion of other pathogens.***  
4  
5

6 Specific comments:  
7

8  
9 Comment #2: Line 124 – Was using fish in the best digestion condition necessary to prevent degradation  
10 of the disease DNA? Could this have influenced your analysis later where you compared condition of the  
11 consumed and non-consumed fish?

12 ***Response #2: Yes, we wanted to minimize the potential degradation of the infectious agent by***  
13 ***selecting the best digestion individuals. Yes, it is possible that even worse condition individuals could***  
14 ***have experienced further degradation than we observed. We discuss the potential impacts of our***  
15 ***sampling methodology, and potential biases due to degradation, (L388-405 and 458-487).***  
16  
17  
18

19 Comment #3: Line 195-198 – Based on the discussion that we've been having; it is apparent that this is a  
20 complex dataset that requires some careful consideration in how it is analyzed. I appreciate that the  
21 authors put the effort into attempting the mixed effects model, unfortunately without success.

22 However, I still don't believe that individual Fisher's exact test for each tissue and year is the correct way  
23 to analyze these data. The main problem with the GLM that I suggested appeared to be the year effect,  
24 due to the singularity issue. I will list what I think is required at a minimum and then make some  
25 additional recommendations for some added complexity that I think would improve the analysis:

26  
27 1) At a minimum the authors should fit a logistic regression where the response is whether or not a fish  
28 was predated and the covariates are: a) whether or not that fish was infected with the single disease  
29 (e.g. IHNV) the authors want to test, b) fish length, c) the tissue (gill or liver) tested, d) a year effect for  
30 the diseases that occur over multiple years. Fish length needs to be included in this GLM, rather than  
31 using a second t-test later as the authors currently do. Fitting one model to test whether disease  
32 increases predation risk and a second to test if there is an effect of length on predation is inappropriate,  
33 because any results from these tests will give you false precision since you are doing two separate tests  
34 and assuming independence between them. However, it is the same fish getting eaten, so they cannot  
35 be independent. If the authors have further difficulty getting the models to converge, I highly encourage  
36 them to consult with a statistician or quantitative ecologist that can help them through the analysis.  
37  
38 2) It might also be interesting to try to fit a model that includes multiple diseases, but I recommend that  
39 the authors only include the most prevalent diseases (e.g. *Candidatus Branchiomonas cisticola*,  
40 *Flavobacterium psychrophilum*, *Ichthyophthirius multifiliis*, *Infectious hematopoietic necrosis virus*,  
41 *Pacific salmon parvovirus*). That will greatly reduce the number of parameters in your model, since it  
42 appears fairly obvious without using statistics that none of the other diseases will come out as  
43 significant.  
44  
45

46  
47 3) Another option, if you did want to show the effect of all disease on predation risk, would be to fit a  
48 multivariate GLM. But that would be considerably more complex and not necessary for your purposes.

49 ***Response #3: We have conducted additional analyses. However, they are not exactly as prescribed by***  
50 ***the reviewer, for the reasons we discuss below (as well as in the Methods; L119-217, Results L250-263,***  
51 ***and Discussion L338-358 and 426-434. The reviewer requested both a global model including both***  
52 ***years "for diseases that occur over multiple years" but also to "try a model that includes multiple***  
53 ***diseases." Even here, it is unclear how many models the reviewer actually wants presented, and***  
54 ***recognizes the complexity of our data. This also speaks to (as noted in our previous revision and***  
55  
56  
57  
58  
59  
60

1  
2  
3 *response to reviewers, and by the reviewer above) that because some pathogens are only found in one*  
4 *year or the other, it is difficult to assess multiple pathogens simultaneously AND include year as a*  
5 *covariate. It's also unclear what adding year as a covariate would provide beyond our current*  
6 *analyses (the reader can easily assess the relative impacts of an agent on predation risk, and overall*  
7 *prevalence, between both years).*  
8  
9

- 10  
11  
12  
13  
14  
15  
16  
17  
18  
19  
20  
21  
22  
23  
24  
25  
26  
27  
28  
29  
30  
31  
32
- *Including tissue is nonsensical as an explanatory variable for models attempting to explain probability of predation (predation binary as response variable). The coefficients from this value would simply reflect the number of samples taken for each predation group for each tissue. It would not reflect differences in the relationship between predation probability and infectious agents between tissues without including an interaction (agent1 \* tissue), and given our sample size, we cannot include interactions between each agent and tissue.*
  - *Only including the "most prevalent" pathogens is also not a sound a priori modeling decision. The most virulent pathogens generally occur at lower prevalences (because in many cases, except at extremely high host densities, hosts perish rapidly and are unable to pass on the infection). As stated in our paper, there is other work pointing to IHNv affecting survival, with population-level prevalence rates at <15%. In reality, the fact that a given pathogen occurs at high prevalence is a likely indication that it is NOT virulent. Furthermore, it is simply not good science to hand-pick the pathogens to assess, particularly when the reviewer wants a more comprehensive analysis than what we have presented previously.*
  - *Similarly, although adding FL is a good idea to a modeling framework, this only acts to assess the independent impact of fish length on predation risk – understanding how the relationship between predation ~ FL is affected by pathogens would require interaction terms (which due to sample size, we cannot explore) or further post-hoc assessments such as those we provided (size distributions of infection-positive vs infection-negative fish).*

33  
34  
35  
36  
37

*In light of this, while also attempting to provide a more comprehensive analysis as requested by the reviewer, we added the following generalized linear modelling (GLM) framework to our paper (also described in the Methods L 199-217).*

- 38  
39  
40  
41  
42  
43  
44  
45  
46  
47  
48  
49  
50  
51  
52  
53  
54  
55  
56  
57  
58  
59  
60
- *Four global models were constructed, one for each year-tissue combination (so 2014-gill, 2014-liver, 2015-gill, and 2015-liver)*
  - *Predation status was the response variable (as requested)*
  - *Explanatory variables included: FL and presence/absence of infectious agents. Only infectious agents that were detected at least twice in a given tissue-year combination were included (this helped ensure a large enough sample size to have faith in a result in as consistent of a manner as possible). Infectious agents that were found among all samples, predated and not, were not included (as these would thus have no impact on predation risk).*
  - *Another confounding factor in smolt lengths is smolt age. Two age classes emigrate from Chilko Lake, with Age-1 smolts constituting on average ~96% of the migrating population, while age-2 are substantially larger but make up ~4% of the migration. Thus length is confounded by age. Age 2 fish were only sampled in 2014, with 8 of the 32 predated smolts being age-2 (no control fish were age 2). Thus, age-2 smolts were removed from 2014 GLM analyses, as they were only present in the predated group (and thus age and FL were confounded).*

- ***We used all subsets regression to rank candidate models via AICc. But to prevent overfitting due to our small sample sizes, the maximum number of parameters in each candidate model was limited to three (not including the intercept).***

***Overall, these models still identified the main result – that IHNv strongly increased predation risk. However, some other interesting results emerged, including smaller smolts at higher risk of predation, and potential increase in predation risk associated with Ichthyophthirius multifiliis. Please see our new Results (L250-258) and Table 2) and Discussion (L338-358) on these topics. These models do represent an improvement to the paper. However, we feel these analyses work best in addition to, rather than in replacement of, our former results. This is largely due to the inability to include all pathogens within global models (and given this is the broadest published screening of infectious agents in this population to-date, it is important to publish the prevalence rates and odds-ratio associated with predation in a straightforward manner) and that we had to do further subsetting of the data to run the models.***

Comment #4: Lines 220-224: See my recommendation above about testing the effects of length on IHN infection. If the authors want to disentangle the effect of fish length and disease on predation rates, these need to be included in the same model. Currently, the authors are testing the hypothesis that there is no difference in length between IHN infected fish. But, it is still possible that the consumed IHN fish were smaller than all other fish.

***Response #4: Please see our new GLM analyses and response to the broader comment. We do see evidence of size-based selection, but it still appears that this effect is independent of IHNv infection (which is logical, based on the speed at which IHNv causes disease, as described in our paper). Please note that even the reviewer's suggested modelling framework would have not identified if "consumed IHN+ fish were smaller than all other fish" without including an interaction term, which our study sample size simply would not allow.***

Comment #5: Line 275-280: It's unclear to me how these tests differs from the tests the authors describe on lines 220-224.

***Response #5: We are confused by this comment, because lines 220-224 referred to comparisons of fish length, while lines 275-280 referred to comparisons of fish condition. No changes to the text have been made from this comment.***

Comment #6: Lines 302-316: I think somewhere in here you should comment on the differences between IHNv and the other diseases. You observed an increased risk of predation with IHNv, but not with any of the other infections, based on what you know of these diseases, can you formulate some hypotheses about why you observed those results?

***Response #6: In our Discussion, we do have a paragraph describing why IHNv is unique – in terms of its ability to infect, cause disease, and affect mortality of juvenile sockeye salmon. Simply, IHNv has long been known to cause acute disease and mortality, particularly in juvenile salmonids, relative to many of the other infectious agents we screened (L323-327). The infectious agents we screen are quite diverse, and thus should not be expected to behave similarly (some are viruses, others bacteria, others parasites). However, in response to this comment as well as a previous one, we have added text in the Discussion to clearly acknowledge that most infectious agents do not cause an increase in predation***

1  
2  
3 **risk (L359-367).**  
4

5  
6 Comment #7: Lines 330-331: Specifically, you provide evidence that infection with one specific disease  
7 can increase risk to fish in the wild. In fact, two other diseases, that appear to have higher prevalence in  
8 your samples and in the system, didn't have any impact on predation. It seems like you are ignoring that  
9 result to focus on the single positive result that you had. I find it really interesting that there appear to  
10 be some diseases that don't increase the risk of predation. I think that dichotomy, that some diseases do  
11 increase the risk of predation while some may not, should be addressed in the discussion.  
12

13 ***Response #7: It is important to make the clear distinction between an infection and disease (see L55-  
14 58 and L359-360). Infection is simply when a pathogen (something that could cause disease) is  
15 present. Infection can occur without disease (similar to how many with COVID19 are asymptomatic).  
16 Every animal has several infections at any given time, but that does not mean they are diseased.  
17 Disease is when an organism's function is affected by the presence of an infection. Although our use of  
18 VDD genes allows us to identify potential smolts that are experiencing disease, the reviewer here is  
19 focusing our prevalence rates of infections. It is not surprising, rather expected, that infectious agents  
20 can be present without increasing predation risk. Particularly, when infectious agents are at very high  
21 prevalence rates (90+% as we observe in the couple pathogens noted by the reviewer), is highly likely  
22 they do not cause disease in that given host (unless we were witnessing an epidemic before our eyes)  
23 or at least not strong enough disease to impact survival (think of the common cold). We have added  
24 text to recognize that most infectious agents will not increase predation risk (L359-367).***  
25  
26  
27  
28

29  
30 Comment #8: Lines 430: Again, you are overselling your results a little. You didn't find that 'specific  
31 infections can be associated with higher predation risks', but rather that a single infection was  
32 associated with a higher predation risk while multiple others were not.

33 ***Response #8: We do not understand this comment. IHNv is a 'specific infection' – we do not claim that  
34 many or all infections result in increased predation risk. We did not edit the text based on this  
35 comment. In addition, the new models requested by the reviewer suggest at least one other pathogen  
36 could be linked to predation.***  
37  
38

39  
40 Comment #9: Table 1: I appreciate that the authors added the extra information that was requested, but  
41 that generally requires adjusting the table to accommodate the additional information. This table is now  
42 a little difficult to comprehend with the way it is arranged. They should to play around with formatting  
43 to make it easier for the reader to digest.

44 ***Response #9: We have made additional adjustments in Word (changing column widths throughout,  
45 further reducing font size) but indeed a lot of information was asked for. We are hopeful that further  
46 organization can be done at the typesetting phase, if we are fortunate enough to publish.***  
47  
48

49  
50 Comment #10: Table 1: Do you have sample sizes for these other studies? Are there any confidence  
51 intervals for these prevalence rates?

52 ***Response #10: We have decided to replace info from these others studies, that felt awkward, with  
53 results from provincial screening of infectious agents in this population of juvenile sockeye salmon  
54 smolts from mixed tissues (via the Strategic Salmon Health Initiative). We were able to acquire these  
55 data between the previous revision and now, and permission to use here. See amendments to Table 1.  
56 We include ranges of sample sizes in the Table caption. However, due to space constraints (already  
57  
58  
59  
60***

1  
2  
3 ***noted by the reviewer in Comment #9), we did not include confidence intervals of these prevalence***  
4 ***rates (but with proportions these can be calculated from the sample size).***  
5

6  
7 Reviewer: 1

8 Comments to the Author(s)

9  
10 Comment: well done- really enjoy this paper

11  
12 ***Response: We are glad that someone did enjoy the paper. Thank you for your continued support of***  
13 ***this paper and seeing value in it.***  
14  
15  
16  
17  
18  
19  
20  
21  
22  
23  
24  
25  
26  
27  
28  
29  
30  
31  
32  
33  
34  
35  
36  
37  
38  
39  
40  
41  
42  
43  
44  
45  
46  
47  
48  
49  
50  
51  
52  
53  
54  
55  
56  
57  
58  
59  
60

## Appendix D

Associate Editor Comments to Author:

This paper represents something of a tricky call for the editors. On the one hand, it seems clear the authors are doing their best to meet the concerns raised by the referee, but the referee has a number of outstanding concerns regarding the statistical treatment of work. As the authors have had a number of opportunities to revise, and the referee has - likewise - had a number of opportunities to review, it is not clear how productive continued review-revise-review is going to be. Instead, we are going to make the call that the authors should do what they can to address the remaining concerns in a final revision, and this revision will be assessed by the editors alone - if the latter are satisfied that the paper is publishable, it will be accepted for publication: any remaining concerns that the reviewer and the wider community may have at this stage can then be discussed openly with the paper and data accessible to all. The editors thank the reviewers for their support and the authors for their engagement with the process.

***Response: We appreciate the editor reviewing this manuscript one final time. We appreciate the editor acknowledging how much we have done in attempt to assuage the one reviewer with remaining concerns. We have taken efforts to address these final comments by the reviewer, including running GLMs again and using a model averaging approach. All line numbers referred to in our response below correspond to the track-changes document (rather than the "clean" version).***

Reviewer comments to Author:

Reviewer: 2

Comments to the Author(s)

Comment #1: Now that the GLM has been conducted, I don't think the individual Fisher exact tests are needed. I think the results from these tests are repetitive and simply serve to confuse the readers. My guess is that the author's want to include these tests to highlight the odds ratios; however, as I mention in the attached file, odds ratios can be easily calculated by exponentiating the coefficients of a logistic regression.

***Response #1: Although we understand the reviewer's point, we feel strongly that the Fisher exact tests still need to remain in the paper. As described in our previous response (Response #3 to this reviewer on the last revision), we have several reasons for this, that we will expand upon here.***

- ***As recognized by the reviewer, we are unable to include all pathogens within global models (due to not being observed in all tissue-predation status combinations). This includes some of the most prevalent pathogens that we feel strongly are important to report. We also had to subset data further by age for models to conform. Thus the GLMs do not represent all of the samples we assessed. Collectively, these samples represent the broadest screening of pathogens in sockeye salmon smolts to date, and thus including all of these data are important.***

- ***We think presenting both the fisher exact tests and the GLM results actually will act to improve reader confidence in the results (our story is largely the same, regardless of statistical analysis), rather than confuse. Given that our data are low in power, and that subsetting/exclusion was needed for GLMs, it's nice to show that our main effect (IHNv associated with predation) stands out regardless of approach.***
- ***Although the story is largely the same regardless of approach, having both statistical approaches also helps provide some nuance. When including multiple binary explanatory variables in logistic regression (i.e. presence/absence of multiple pathogens), the coefficient for each variable is dependent upon others (what is the relationship of predation and a pathogen when all other pathogens are absent or = 0). In the case of Flavobacterium psychrophilum, this resulted in some negative coefficients in 2014 models, due to small sample size of the agent when IHNv was absent. Providing the total counts (without subsetting for GLMs) and the overall odds ratios make it clear that in general, this pathogen was more prevalent in predated samples, complementing the complexities of the GLM.***
- ***Lastly, we still feel there is value in providing the odds ratios and exact test significance in a straightforward manner for those interested in fish disease ecology. Although GLM coefficients can be used to calculate odds ratios as suggested by the reviewer, it is still another step required of the reader that can result in error. And given that GLM coefficients vary (slightly) among models for the same data (see our responses below), it makes sense to provide an odds ratio this is consistently calculated for each pathogen, independent of other effects (which then the GLM results complement well).***

Comment #2: There were some obvious problems with the coefficients of the top logistic regression models that were presented. Some of the covariates in these models have coefficients over 15, meaning they had odds ratios over 3 million!! This is obviously unrealistic. After doing a little investigating by looking at Table 1, I realized all these covariates with large coefficients either had 0% or 100% predated or not predated. That means there were either no values in the numerator or denominator of the odds ratio (just like you couldn't calculate the odds ratio for those diseases in those tissues in those years). Since the coefficient estimates in the logistic regression of the logs of the odds ratio, the coefficient estimates for these covariates aren't realistic. In other words, for your logistic regression model, you can't include any of the diseases for any of the tissues in any year that you couldn't calculate an odds ratio in table 1.

***Response #2: Indeed, coefficients are difficult to interpret when a pathogen-status, predation status combination contained a zero (which occurred in both rare as well as common pathogens, the latter of which could have zero negatives in either a predated or non-predated group). We were attempting to follow the reviewer's suggestion, of including the most prevalent pathogens. We also were careful in our language of the Results and Discussion to downplay model results for pathogens with unrealistic coefficients. In response this comment, however, we have re-run all of the models (Table 2), and only include pathogens that had at least one sample in each predation status-infection-status combination. The main result is still the same – IHNv presence increases predation risk. However, there are subtle differences, such that we now provide brief discussion on Flavobacterium psychrophilum and Pacific salmon parvovirus (but we caution overinterpreting these results as they are inconsistent). We also removed text on Candidatus Branchiomonas cysticola as this infectious agent no longer is entered in***

***models for assessment. As mentioned in our previous version of the paper, we do not expect this agent to affect survival as it is pretty ubiquitous and in our group's work has never had links to mortality. We have edited the Methods (L211-215) to reflect these changes in the modelling as well as the Results (L260-267) and Discussion (L350-364) as needed.***

Comment #3: The best practice for model selection isn't to just interpret the top model, but to either use model averaging or to pick the most parsimonious model from your top model set. Things may change after you modify which diseases to include in your models, but, currently most of your top models are subsets of one of the top models (i.e., they include all the same covariate plus some some additional ones). If that continues to be the case, you should just use that most parsimonious model as your top model.

***Response #3: In response to this comment, we averaged top-ranked models (those with Delta AICc < 3) and present these in Table 2. We also added to Table 2 the AICc weight, which represents the proportion (probability) that the model is the best among the candidate set to increase interpretability, which helps further interpret models. We have done AICc weight among all models as well as recalculated for models with Delta AICc <3, which were used for model averaging. We have also added additional text to mention some of the other variables that were included in high-ranking models but not the top model for each tissue-year combination (Results L260-267 and Discussion L350-364) to fully acknowledge that there are other variables that could contribute to predation risk beyond those in the top-ranking model.***

***In regards to "picking the most parsimonious model from your top model set" we are a bit confused. We have ranked models based upon a measure of parsimony – AIC – that is an information criterion commonly used to assess model parsimony in ecology and biology (rather than an ad-hoc approach as suggested by the reviewer). We are not familiar with an approach where an information criterion is used to run models, and then subsequently use a separate ad-hoc approach to pick a different "top" model within that subset.***
